# Supplementary material for: Demographic and social correlates and indicators for behavioural compliance with personal protection among Chinese community-dwellers during COVID-19: a cross-sectional study
Source: PubMed Central journal article supplement — BMJ Open. 2021 Jan 6;11(1):e041453. doi: 10.1136/bmjopen-2020-041453 (PMC7789200; doi:10.1136/bmjopen-2020-041453), 2021-01-06
Supplement: bmjopen-2020-041453.draft_revisions.pdf [file bmjopen-2020-041453.draft_revisions.pdf]

# BMJ Open

BMJ Open is committed to open peer review. As part of this commitment we make the peer review history of every article we publish publicly available.

When an article is published we post the peer reviewers' comments and the authors' responses online. We also post the versions of the paper that were used during peer review. These are the versions that the peer review comments apply to.

The versions of the paper that follow are the versions that were submitted during the peer review process. They are not the versions of record or the final published versions. They should not be cited or distributed as the published version of this manuscript.

BMJ Open is an open access journal and the full, final, typeset and author-corrected version of record of the manuscript is available on our site with no access controls, subscription charges or pay-per-view fees (<http://bmjopen.bmj.com>).

If you have any questions on BMJ Open's open peer review process please email [info.bmjopen@bmj.com](mailto:info.bmjopen@bmj.com)

# BMJ Open

## Behavioural Compliance with Personal Protection in Chinese Community-Dwellers During the COVID-19: Correlates and Indicators

|                               |                                                                                                                                                                                                                                                                                                                                                                                                                                                                                   |
|-------------------------------|-----------------------------------------------------------------------------------------------------------------------------------------------------------------------------------------------------------------------------------------------------------------------------------------------------------------------------------------------------------------------------------------------------------------------------------------------------------------------------------|
| Journal:                      | <i>BMJ Open</i>                                                                                                                                                                                                                                                                                                                                                                                                                                                                   |
| Manuscript ID                 | bmjopen-2020-041453                                                                                                                                                                                                                                                                                                                                                                                                                                                               |
| Article Type:                 | Original research                                                                                                                                                                                                                                                                                                                                                                                                                                                                 |
| Date Submitted by the Author: | 09-Jun-2020                                                                                                                                                                                                                                                                                                                                                                                                                                                                       |
| Complete List of Authors:     | Xu, Xin; Zhejiang University School of Public Health; National University Singapore Yong Loo Lin School of Medicine<br>Chew, Kimberly; National University Singapore Yong Loo Lin School of Medicine<br>Wu, Zhihua; Zhejiang University School of Public Health<br>Xiao, Xiaohua; Zhejiang University School of Public Health<br>Yang, Qian; Zhejiang University School of Public Health; Zhejiang University School of Medicine Children's Hospital, Department of Endocrinology |
| Keywords:                     | Public health < INFECTIOUS DISEASES, Demography < TROPICAL MEDICINE, EPIDEMIOLOGY                                                                                                                                                                                                                                                                                                                                                                                                 |
|                               |                                                                                                                                                                                                                                                                                                                                                                                                                                                                                   |

SCHOLARONE™  
Manuscripts

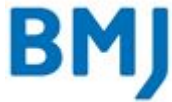

I, the Submitting Author has the right to grant and does grant on behalf of all authors of the Work (as defined in the below author licence), an exclusive licence and/or a non-exclusive licence for contributions from authors who are: i) UK Crown employees; ii) where BMJ has agreed a CC-BY licence shall apply, and/or iii) in accordance with the terms applicable for US Federal Government officers or employees acting as part of their official duties; on a worldwide, perpetual, irrevocable, royalty-free basis to BMJ Publishing Group Ltd ("BMJ") its licensees and where the relevant Journal is co-owned by BMJ to the co-owners of the Journal, to publish the Work in this journal and any other BMJ products and to exploit all rights, as set out in our [licence](#).

The Submitting Author accepts and understands that any supply made under these terms is made by BMJ to the Submitting Author unless you are acting as an employee on behalf of your employer or a postgraduate student of an affiliated institution which is paying any applicable article publishing charge ("APC") for Open Access articles. Where the Submitting Author wishes to make the Work available on an Open Access basis (and intends to pay the relevant APC), the terms of reuse of such Open Access shall be governed by a Creative Commons licence – details of these licences and which [Creative Commons](#) licence will apply to this Work are set out in our licence referred to above.

Other than as permitted in any relevant BMJ Author's Self Archiving Policies, I confirm this Work has not been accepted for publication elsewhere, is not being considered for publication elsewhere and does not duplicate material already published. I confirm all authors consent to publication of this Work and authorise the granting of this licence.

1  
2  
3 Behavioural Compliance with Personal Protection in Chinese Community-Dwellers During the COVID-19:  
4  
5 Correlates and Indicators

6 **Xin Xu<sup>1,2</sup>, PhD, Kimberly Ann Chew<sup>2</sup>, BA (Hons), Wu<sup>1</sup> Zhihua, BA, Xiao<sup>1</sup> Xiaohua, BA, Yang Qian<sup>1,3\*</sup>, PhD**

7  
8 *1. School of Public Health & the 2<sup>nd</sup> Affiliated Hospital of School of Medicine, Zhejiang University, China*

9  
10 *2. Yong Loo Lin School of Medicine, National University of Singapore, Singapore*

11  
12 *3. Department of Endocrinology, the Children's Hospital, Zhejiang University School of Medicine, National Clinical Research*  
13 *Center for Child Health*

14  
15  
16  
17 Corresponding author:

18 Dr. Qian Yang

19  
20 1011 Administrative Building, Zijingang Campus, Zhejiang University, Hangzhou, China, 310058

21  
22 Abstract word count: 219 words

23  
24 Word count: 2452 words

25  
26 Number of figures & tables: 4

27  
28 Key words: covid-19 coronavirus, behavioural compliance, social distancing, personal protective measures

## ABSTRACT

### *Objectives:*

Examine compliance with personal protective measures in communities for the prevention and control of local transmission of the coronavirus (COVID-19), and explore indicators for such behavioral compliance.

### *Design:*

Cross-sectional design. Data collected in February 2020.

### *Setting:*

Community dwellers in China.

### *Participants:*

2956 participants aged 16 and above completed the study and were included in the analysis.

### *Outcome measures:*

Nationwide COVID-19 survey. Demographics and individual compliance with four major personal protective measures—home quarantine, mask-wearing, temperature-taking and hand-sanitizing were collected and recorded. Outbreak severity and timeliness of personal protection order were obtained from the China Centre Disease Control (China CDC) website. Linear and logistic regression models were employed to examine the association between demographic and social indicators and personal behavioral compliance.

### *Results:*

An increasing age ( $\beta$ [95%CI]=2.58[2.38-2.78] and higher regional risk-exposure ( $\beta$ [95%CI]=0.16[0.12-0.20]) were independently associated with higher level of overall behavioural compliance. Male was found the least accordance with home quarantine order, whilst the most compliant with others. Younger adults (<21) abided the least with protective measures, whilst the middle-age group (21-49) was the most compliant group, except for home quarantine order.

### *Conclusion:*

The non-compliance with public health mitigation measures was largely attributed to the male gender, and being in the middle-aged group. In light of ongoing pandemic, public health authorities should tailor the policy implementation to this specific demographic.

### **Strengths and limitations of this study**

- To our knowledge, our study is the first to examine the effect of demographical and social correlates on the compliance of public health mitigation measures, especially social distancing, during the COVID-19 outbreak.
- Extensive data collected during the peak of the COVID-19 outbreak in China.
- Findings provide important insight into the motivations behind the lack of compliance to personal protection measures,

1  
2  
3 especially during the heightened period of the outbreak, which can be used by public health authorities in the  
4 implementation of future mitigation measures.

- 5  
6  
7 - Although the study could examine the effect of age and gender on behavioral compliance, the effect of education and  
8 occupational status was limited due to the lack of data.  
9  
10 - Survey was available online only, hence sample limited to those with access to digital technology and Internet  
11

## 12 13 INTRODUCTION

14  
15  
16  
17 In light of the coronavirus disease 2019 (COVID-19) outbreak that started from December 2019, The Chinese Government has  
18 taken a number of strict mitigation strategies to expedite tracking, testing and treating COVID-19. To prevent and control the  
19 transmission of the virus in local communities, the aggressive social distancing order has been enforced nationwide in China as  
20 early as from January 25, 2020. Through strict compliance of Chinese citizens to the order, social distancing has been proven the  
21 most effective measure to ease the rapid spreading of the virus.<sup>1 2</sup>

22  
23  
24  
25 A nationwide movement restriction order was announced by the Chinese government soon after the lockdown of Wuhan city on  
26 January 23, 2020. The social distancing order then has been introduced and enforced subsequently, requiring all citizens to remain  
27 at home and avoid most forms of face-to-face social contact when outside. The order was implemented with the recommendation  
28 of other personal protective measurements, such as regular hand sanitizing, daily temperature taking, and masking-wearing.<sup>3</sup>

29  
30  
31  
32  
33  
34 The implementation of the social distancing order was challenging. Social distancing means staying away from mass gatherings and  
35 keeping a distance of 6 feet or 2 meters.<sup>1</sup> Due to the Chinese New Year celebration, which took place around the same time  
36 (January 25, 2020) when the outbreak happened, movements among cities and suburban areas, as well as family gatherings were  
37 inevitable and difficult to contain. Voluntary behavioural intervention during an infectious disease outbreak, such as social  
38 distancing, requires not only sufficient realization of the situation severity, but more importantly, determined commitment to  
39 such action from individuals in the community. Compliance with such action is not only determined by the severity of the disease,  
40 but also a number of demographic (e.g., gender) and interpersonal psychosocial factors.<sup>4 5</sup> Interestingly, while previous literature  
41 have demonstrated that older people and females are typically more likely to practice protective behaviors in public health  
42 emergencies such as the severe acute respiratory syndrome (SARS) and H1N1 swine flu, the results are mixed.<sup>6 7</sup> Hence in the  
43 present study, we sought to understand the demographic indicators and correlates of individual's compliance to social distancing  
44 during the COVID-19.  
45  
46  
47  
48  
49  
50  
51  
52  
53  
54  
55  
56  
57  
58  
59  
60

## METHODS

### Study design and sampling

With a cross-sectional study design, two nationwide online surveys on the COVID-19 were carried out during February 14-20, 2020, among Chinese citizens in China. Community dwellers aged 16 and above were enrolled in the survey. To avoid bias in the sample, the study team disseminate the survey questionnaire in multiple provinces with different levels of risk exposure. All participants provided electronic informed consent prior to taking the survey. The study protocol was approved by the Ethics Commission of Zhejiang University prior to the commencement of the study and was in accordance with the Declaration of Helsinki. STROBE cross-sectional reporting guidelines were used.<sup>8</sup>

### Questionnaires

De-identified demographic information (age, gender, current living area) was collected.

*Outbreak Severity*: Severity of the outbreak in each province and regions in all survey areas were sorted into 5 categories according to the confirmed coronavirus cases which was published on the China Center for Disease Control and Prevention (CDC) website on the day of the survey (February 14, 2020): <100 cases, 100-499 cases, 500-999 cases, 1000-1999 cases, >2000 cases.

*Policy Timeliness*: Timeliness of social distancing order implemented by the provincial government was assessed by the length (in days) between the implementation date of the social distancing order to the date of the survey. For those areas where the order was implemented after the survey, the score "0" was granted, e.g. Nei Meng province. Scores were subsequently transformed into fractional rank for analysis purpose.

### Compliance to Mitigation Measures

Individual's compliance with a number of mitigation measures introduced by the local government, including:

1. home quarantine, as defined by leaving residential address for  $\leq 1$  in 3 days' time, as per the Chinese government's regulation;
2. mask-wearing, as defined by wearing a mask when leaving the residential address, as per the Chinese government's regulation;
3. daily temperature taking, as defined by taking one's own temperature at least once every day per the Chinese government's regulation;
4. daily hand sanitizing, as defined by sanitizing one's hands with a sanitizer with >75% alcohols per the Chinese government's regulation.

### Statistical Analysis

Linear regression models were employed to examine the association between compliance to mitigation measures and demographic and social determinants. Logistic regression models were applied to investigate the indicators for accordance with each one of the mitigation measures. All analyses were performed using SPSS version 25 software, and statistical significance

was determined as two-tailed p-value < 0.05.

### Patient and Public Involvement

No patients and none of the public were involved in the study planning, design and interpretation of results. Results from the paper will be disseminated to the general public through online article format.

## RESULTS

A total of 3,000 participants completed the survey, among whom, 7 had incomplete data and 37 had repeated answers and were removed from the dataset, leaving a total of 2,956 in the current analysis. All 2,956 subjects completed all questionnaires in the survey. Sample descriptives are in Table 1.

|                                                                             | Whole Sample | Range |
|-----------------------------------------------------------------------------|--------------|-------|
| <i>Demographics</i>                                                         |              |       |
| Age (mean±SD)                                                               | 28.5±8.6     | 16-72 |
| Gender, female, n (%)                                                       | 1178 (39.9%) |       |
| Current Living Area, n (%)                                                  |              |       |
| Extremely High Risk (≥2000 confirmed cases)                                 | 106 (3.5%)   |       |
| High Risk (1000-1999 confirmed cases)                                       | 667 (22.2%)  |       |
| Moderate-High Risk (500-599 confirmed cases)                                | 770 (25.7%)  |       |
| Moderate Risk (100-499 confirmed cases)                                     | 1290 (43.0%) |       |
| Mild-Moderate Risk (<100 confirmed cases)                                   | 167 (5.6%)   |       |
| The average length of implementation of mitigation measures, days (mean±SD) | 15±5.1       | 0-20  |
| <i>Compliance to Mitigation Measures</i>                                    |              |       |
| Social Distancing, compliant, n (%)                                         | 2234 (75.6%) |       |
| Mask Wearing, compliant, n (%)                                              | 2353 (79.6%) |       |
| Hand Sanitizing, compliant, n (%)                                           | 2257 (76.4%) |       |
| Daily Temperature Taking, compliant, n (%)                                  | 2350 (79.5%) |       |

Table 1. Study sample descriptives



### Overall behavioural compliance

Linear regression analysis was done to examine the indicators for total compliance with mitigation measures. Among all demographics and social indicators, age ( $\beta$ [95%CI]=2.58[2.38-2.78] and regional risk-exposure ( $\beta$ [95%CI]=0.16[0.12-0.20]) were independently associated with an increased level of behavioural compliance.

Interestingly, a trend was noticed in the adverse association between timeliness of social distancing order in the local province ( $\beta$ [95%CI]=-1.31[-0.26-0.02]) and overall behavioural compliance.

### Compliance with individual protective measures

Compliance with social distancing was associated with compliance with hand-sanitizing ( $\chi^2=4.21$ ,  $p=0.023$ ), but not with mask-wearing and temperature-taking ( $p=0.07$  and  $0.08$ , respectively). Compliance with mask-wearing was significantly associated with temperature-taking ( $\chi^2=493.11$ ,  $p<0.001$ ) and hand-sanitizing ( $\chi^2=498.55$ ,  $p<0.001$ ). Compliance with temperature-taking was significantly associated with hand-sanitizing ( $\chi^2=802.16$ ,  $p<0.001$ ).

Logistic regression analysis was employed to investigate the predictors for compliance with each mitigation measures: social, distancing, mask-wearing, temperature-taking and hand-sanitizing.

Results showed that gender (female) was the only significant indicator for accordance with home quarantine order; whilst male gender, higher exposure risk and age were positively associated with compliance with the other 3 measures (Table 2).

|                                      | Compliance vs. Non. Compliance<br>OR (95%CI) |
|--------------------------------------|----------------------------------------------|
| <i>Home Quarantine</i>               |                                              |
| Gender, Female                       | 1.56 (1.31-1.87)                             |
| <i>Mask-Wearing</i>                  |                                              |
| Gender, Male                         | 1.76 (1.47-2.12)                             |
| Regional Risk-exposure               | 1.43 (1.30-1.57)                             |
| Age                                  | 1.03 (1.02-1.04)                             |
| <i>Temperature-taking</i>            |                                              |
| Gender, Male                         | 1.29 (1.07-1.55)                             |
| Age                                  | 1.01 (1.001-1.02)                            |
| Regional Risk-exposure               | 1.02 (1.001-1.04)                            |
| Timeliness for Policy Implementation | 1.018 (1.000-1.036)*                         |

---

|                        |                  |
|------------------------|------------------|
| <i>Hand-sanitizing</i> |                  |
| Age                    | 1.02 (1.01-1.03) |
| Regional Risk-exposure | 1.38 (1.26-1.50) |

---

Table 2. Indicators for compliance with respective mitigation measures

\*. *Trend for significance (p=0.052)*

Gender-specific compliance with each personal protective measure is presented in figure 1. Whilst male was less prone to be compliant with home quarantine order; they were more likely to abide other 3 personal protective measures.

Interestingly, the mid-age group (21-49) was the most non-compliant age group for social-distancing, nevertheless also the most compliant group for other protective behaviors (Figure 2). Further stratified analysis showed that, in the 21-49 age group, those who are aged 31-40 were the least compliant to the social distancing order (OR=1.95, 95% CI=1.47-2.59), twice less likely to stay at home compared to the most compliant age group (<21 years of age), yet the most compliant group for mask-wearing (OR=1.86, 95%CI=1.38-2.52).

## DISCUSSION

To our knowledge, the present study is the first to examine psychosocial indicators and correlates of the general public's compliance to personal protective measures during the COVID-19 outbreak in China. The main findings from the present study is that among all demographic and psychosocial factors, age and gender are the two main indicators for behavioural compliance to the protective measures.

Among all of the mitigation measures various countries have been taking in the COVID-19, social distancing has been the most emphasized measure, and proven the most effective one.<sup>9</sup> China introduced the strict social distancing order in February when the epidemic was spreading at an alarming rate and causing an increasing number of deaths in the nation.<sup>3</sup> The execution of such an order was combined with home quarantine, the shutdown of all public places, including shops, malls, restaurants and entertainment venues, and forbidding of mass gatherings. With such a rigorous combination, the domestic and global spreading speed of the virus showed a significant slowdown from mid-February till mid-March.<sup>10</sup>

In the present study, males were found less likely to be compliant with the social-distancing order (72% vs. 74%), nevertheless more likely to follow other personal protective approaches, such as mask-wearing (83% vs. 74%), temperature taking (81% vs.

1  
2  
3 77%), and hand sanitizing (77% vs. 75%). One plausible explanation for the gender difference in the behavioral compliance is  
4 that males, especially in the mid-age group, are identified to be the pillar in the family hence during a public health emergency  
5 like the COVID-19, males are more expected to carry on with family errands and even go to work. In the present study, 87  
6 reported violation of the home-quarantine order. Among whom, 60 went out for shopping/collection of essential goods (home  
7 supplies and grocery), with 67% of them being male. Apart from this, 24 reported to have left home for work purposes, among  
8 whom 67% were male. Our findings support previous literature that reported males were more likely to partake in riskier  
9 behaviors such as going to crowded places during the early stages of the COVID-19 outbreak in the Hubei Province and other  
10 parts of China.<sup>5</sup> While gender roles have become increasingly blurred in modern-day China, the male breadwinner model still  
11 exists in China's social fabric today.<sup>11</sup> In relation to Confucian culture, the model posits a gender role divide between males and  
12 females where males undertake an 'outside' role and are expected to provide for the family, while females take on the caregiving  
13 role ('inside' role) to tend to household matters.<sup>12-14</sup> Qian and Qian<sup>13</sup> reported greater happiness in males when they are employed  
14 and providing for the family compared to females' employment status. Therefore, nonconformity to expectations of social roles  
15 particularly on the economic aspect may inevitably affect the health and welfare of both males and females. As a result, the  
16 conformity to role expectations in society may explain the non-compliance by males to social distancing measures as they are  
17 expected to continue providing for the family even during a public health crisis. Furthermore, gender only affected social  
18 distancing compliance in people above 21 years old, an age group where most working-class fall into, hence supporting our  
19 findings where more males reported leaving their homes for work purposes. While previous studies have shown that females are  
20 more likely to adhere to more avoidant behaviors such as hand washing and wearing masks,<sup>6 7 15</sup> the present study reported a  
21 higher likelihood for males to comply with those behaviors apart from social distancing. The present study found a higher  
22 percentage of men leaving the house for essential services, amongst which 53% reported moderate levels of anxiety, therefore  
23 demonstrating that levels of anxiety were high enough to encourage males to comply with other protective measures when they  
24 were out of the house or when they were not practicing social distancing.  
25  
26  
27  
28  
29  
30  
31  
32  
33  
34  
35  
36  
37  
38  
39  
40  
41  
42

43 Though gender played an important role in predicting compliance with home-quarantine in people aged 21 years old and above,  
44 it did not make a difference in people under 21 years old. Studies have shown that late adolescents tend not to comply with social  
45 distancing and stay home orders due to their likelihood in engaging in risky behaviors.<sup>5</sup> However, our study found that those  
46 aged between 16-21 were more likely to stay home, unlike people in the mid-age group, especially those between 31-40 years  
47 old. A possible explanation for the reduced social distancing and staying home compliance in the 31-40 age group is that a large  
48 number of these people may belong to the working class and may have to leave the house for work. Previous literature on  
49 pandemics (e.g., SARS) have reported high levels of anxiety in populations worldwide with a correlation between higher levels  
50 of anxiety and greater compliance to public health measures such as social distancing.<sup>4</sup> Perceived social support might play a  
51  
52  
53  
54  
55  
56  
57  
58  
59  
60

1  
2  
3 crucial role in moderating individual's psychological resilience against such a crisis. Furthermore, greater perceived social support  
4 has shown to contribute to a greater sense of belongingness.<sup>16</sup> According to Maslow's hierarchy of needs, a sense of belonging  
5 is an important factor that drives human behavior.<sup>17</sup> Therefore, individuals who have greater perceived social support may be  
6 more likely to display greater social responsibility and comply with rules and recommendations set out to mitigate the COVID-  
7 19 outbreak, specifically through social distancing, because they may feel obligated to adhere to these rules to elicit a sense of  
8 affiliation and belonging as well as protect the vulnerable in their community in these times of uncertainty.  
9

10  
11  
12  
13  
14  
15 The present study has several strengths and weaknesses. To our knowledge, the present study is amongst the first to examine the  
16 effect of demographical and social correlates on the compliance of public health mitigation measures, especially social distancing,  
17 during the COVID-19 outbreak. Furthermore, the study was conducted during the peak of the spread of COVID-19 in China and  
18 gathered nationwide data from participants in China. Therefore, the findings obtained are especially vital in understanding the  
19 motivations behind the lack of compliance with mitigation measures, particularly during the heightened period of the outbreak.  
20 These results help inform public health authorities and political leaders in the way they implement mitigation measures and  
21 administer financial and psychological aid to the community. Notably, the present study lacked important demographic factors  
22 such as education level and occupational status, which could have further informed future mitigation measures. Moreover, as the  
23 study was conducted through an online survey, the sample was limited to those with access to digital technology and Internet.  
24 Therefore, we were unable to determine if this subset of the population complied to mitigation measures as well as the factors  
25 associated with it. Information obtained from this subset is essential as they may be more vulnerable to the virus due to lack of  
26 access to extensive public health awareness and mitigation measures online. While the lack of access to digital technology is a  
27 real limitation, future studies should attempt to reach out to this subset of the population. Retrospective studies could be conducted  
28 to assess their accordance with mitigation measures, specifically social distancing, and the role of psychosocial indicators and  
29 correlates on the compliance. Additionally, it would be interesting to examine the anxiety levels of those in the under 21 group  
30 that had a significant impact on their compliance with social distancing during the outbreak. Access to social media and  
31 overwhelming information provided by the media every day could be a factor that fueled the heightened levels of anxiety.  
32  
33  
34  
35  
36  
37  
38  
39  
40  
41  
42  
43  
44  
45

46 The non-compliance with public health mitigation measures, particularly home quarantine, was largely attributed to the male  
47 gender, and being in the middle-aged group. Our study found that while male in the mid-age group was least compliant with  
48 social distancing, they were most compliant to other measures (i.e., mask-wearing, hand-sanitizing, and temperature-taking),  
49 possibly due to the need to fulfil the role expectation of being the provider and breadwinner of the family. As the COVID-19  
50 outbreak is still ongoing, public health authorities and governments could target this population in their future measures and aid  
51 that are provided during this pandemic.  
52  
53  
54  
55  
56  
57  
58  
59  
60

1  
2  
3  
4  
5  
6  
7 *Acknowledgements:* The authors would like to acknowledge all study participants for their cooperation.

8 *Contributors:* XX and YQ conceptualized and designed the study. XX drafted the manuscript. YQ supervised data analysis and  
9 interpretation of data. XX, WZ and XXH acquired the data. XX and KAC analyzed and interpreted the data. WZ and XXH  
10 revised the manuscript for intellectual content. YQ and KAC critically revised the manuscript for intellectual content.

11  
12  
13 *Disclaimer:* The funders had no role in study design, data analysis and interpretation, and writing of the manuscript.

14  
15 *Funding:* This study is supported by the National Natural Science Foundation of China (71974170), Soft Science Project of  
16 Science Technology Department of Zhejiang Province of China (2019C35025) and Youth Project of the Center for Health Policy  
17 and Hospital Management of Zhejiang University (2019WSZ007).

18  
19  
20 *Competing interests:* None declared.

21  
22 *Patient and public involvement:* No patients and none of the public were involved in the study design, planning and interpretation  
23 of results. Results from the paper will be disseminated to the general public through online article format.

24  
25 *Patient consent for publication:* Not required.

26  
27 *Ethics approval:* This study has been approved by the Ethics Commission of Zhejiang University (ID: ZGL202005-01). Informed  
28 consent was obtained from participants prior to taking part in the study.

29  
30 *Data availability statement:* Data are available upon request. Original data can be requested from the study team  
31 (xuxinsummer@zju.edu.cn).  
32  
33  
34  
35  
36  
37  
38  
39  
40  
41  
42  
43  
44  
45  
46  
47  
48  
49  
50  
51  
52  
53  
54  
55  
56  
57  
58  
59  
60

## REFERENCES

1. World Health Organization. Coronavirus disease (COVID-19) advice for the public. 2020
2. Zhang Y, Jiang B, Yuan J, et al. The impact of social distancing and epicenter lockdown on the COVID-19 epidemic in mainland China: A data-driven SEIQR model study. 2020 doi: 10.1101/2020.03.04.20031187
3. China Centre for Disease Control and Prevention. 新型冠状病毒肺炎 个人防护怎么做. China, 2020.
4. Leung GM, Lam, T-H, Ho, L-M, Ho, S-Y, Chan, B H Y, Wong I O L, Hedley, A J. The impact of community psychological responses on outbreak control for severe acute respiratory syndrome in Hong Kong. *J Epidemiol Community Health* 2003;57(11):857-63. doi: 10.1136/jech.57.11.857
5. Zhong BL, Luo W, Li HM, et al. Knowledge, attitudes, and practices towards COVID-19 among Chinese residents during the rapid rise period of the COVID-19 outbreak: a quick online cross-sectional survey. *Int J Biol Sci* 2020;16(10):1745-52. doi: 10.7150/ijbs.45221 [published Online First: 2020/04/01]
6. Moran KR, Del Valle SY. A Meta-Analysis of the Association between Gender and Protective Behaviors in Response to Respiratory Epidemics and Pandemics. *PLoS One* 2016;11(10):e0164541. doi: 10.1371/journal.pone.0164541 [published Online First: 2016/10/22]
7. Bish AM, S. Demographic and attitudinal determinants of protective behaviours during a pandemic: A review. *Br J Health Psychol* 2010;15:797-824. doi: 10.1348/135910710X485826
8. von Elm E, Altman, DG, Egger, M et al. The Strengthening the Reporting of Observational Studies in Epidemiology (STROBE) Statement: Guidelines for Reporting Observational Studies. *Epidemiology* 2007;18(6):800-04. doi: 10.1097/EDE.0b013e3181577654
9. Kakodkar P, Kaka N, Baig MN. A Comprehensive Literature Review on the Clinical Presentation, and Management of the Pandemic Coronavirus Disease 2019 (COVID-19). *Cureus* 2020;12(4):e7560. doi: 10.7759/cureus.7560 [published Online First: 2020/04/10]
10. Hao K. China's travel lockdown sharply slowed the global spread of Covid-19. *MIT Technology Review*, 2020.
11. Attané I. Being a Woman in China Today: A Demography of Gender. *China Perspectives* 2012;4:5-15.
12. Lebra TS. Confucian gender role and personal fulfillment for Japanese women. Albany, NY: State University of New York Press. 1998:209–227.
13. Qian Y, Qian Z. Work, Family, and Gendered Happiness Among Married People in Urban China. *Soc Indic Res* 2014;121(1):61-74. doi: 10.1007/s11205-014-0623-9
14. Zuo J. From Revolutionary Comrades to Gendered Partners: Marital Construction of Breadwinning in Post-Mao Urban China. *J Fam Issues* 2003;24:314-37. doi: 10.1177/0192513X02250888
15. de la Vega R, Barquin, R. R., Boros, S., & Szabo, A. Could Attitudes Toward COVID-19 in Spain Render Men More

1  
2  
3 Vulnerable Than Women? 2020, April 2 doi: 10.31234/osf.io/dyxqn.

4  
5 16. Hagerty BM, Williams, R. A., Coyne, J. C., Early, M. R. Sense of belonging and indicators of social and psychological  
6 functioning. Arch of Psychiat Nurs 1996;10:235-44. doi: 10.1016/S0883-9417(96)80029-X

7  
8 17. Maslow AH. Toward a psychology of being. 2nd ed. New York, NY.: Viking 1962.  
9  
10  
11  
12  
13  
14  
15  
16  
17  
18  
19  
20  
21  
22  
23  
24  
25  
26  
27  
28  
29  
30  
31  
32  
33  
34  
35  
36  
37  
38  
39  
40  
41  
42  
43  
44  
45  
46  
47  
48  
49  
50  
51  
52  
53  
54  
55  
56  
57  
58  
59  
60

For peer review only

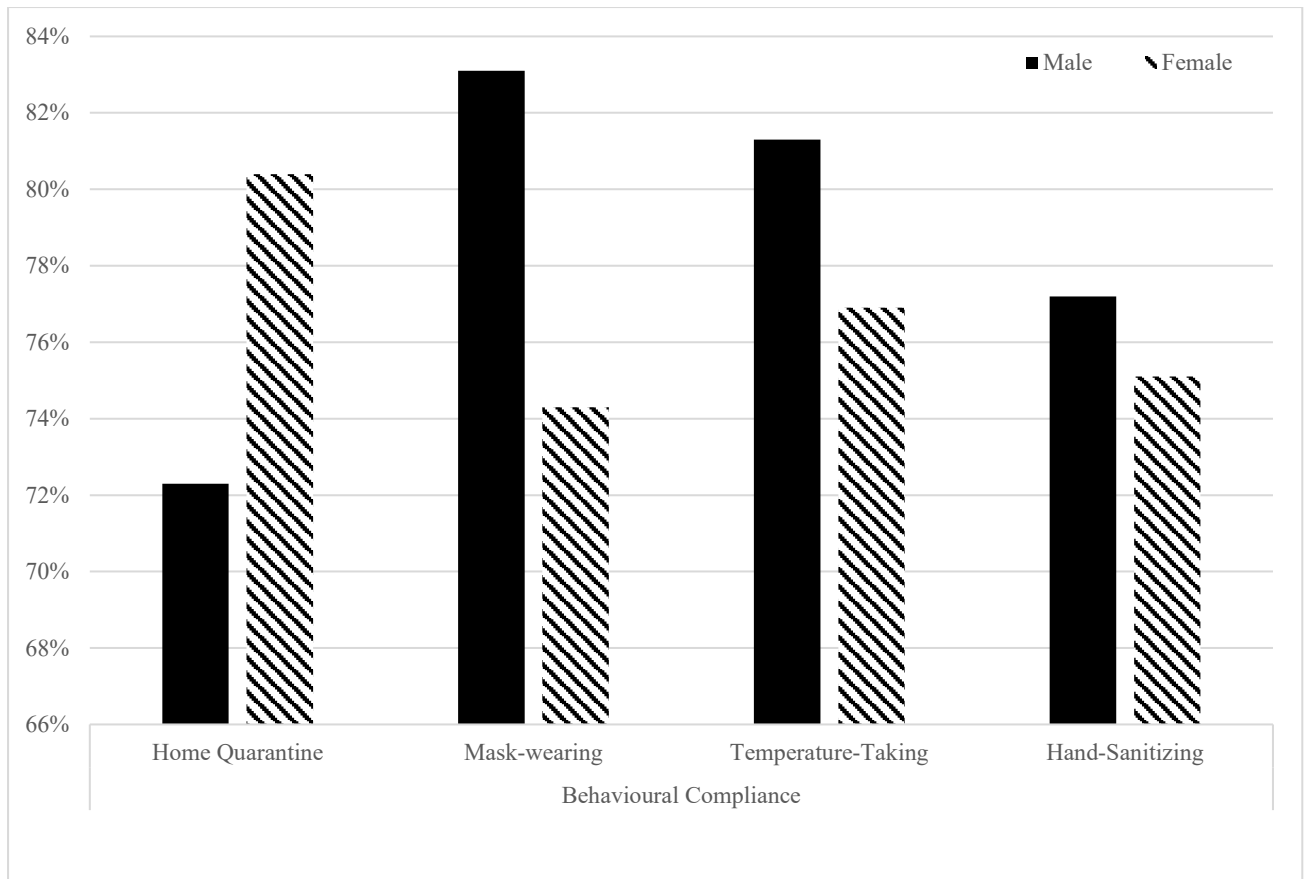

Figure 1. Gender-specific percentages for behavioural compliance



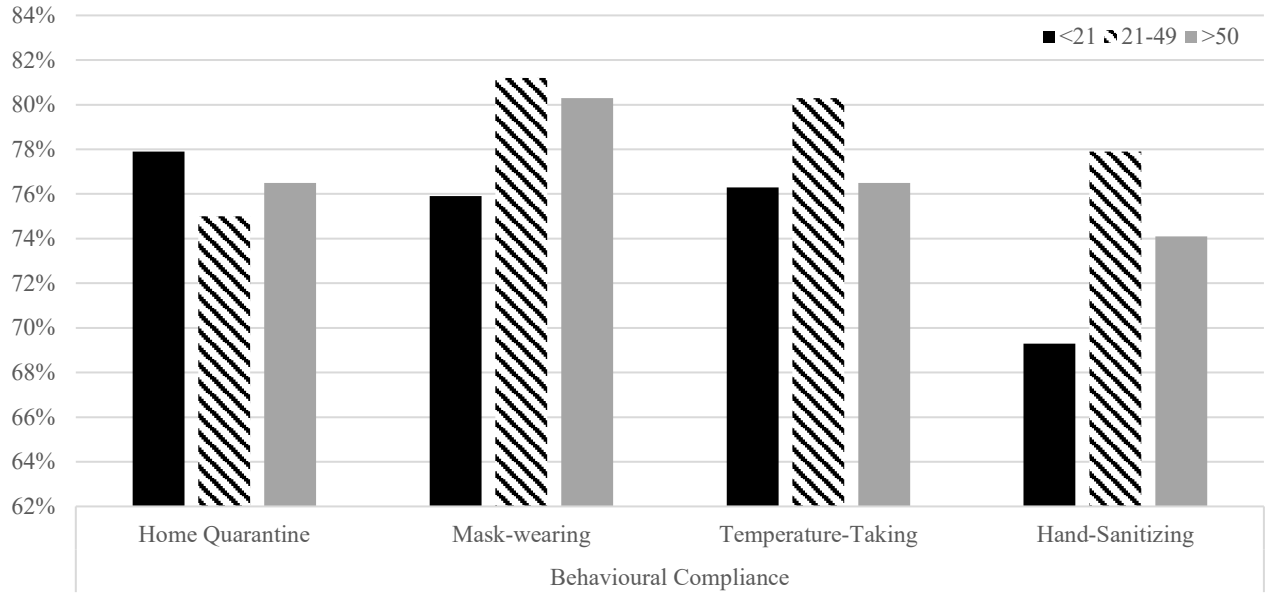

Figure 2. Age-specific percentages for behavioural compliance

# 新型冠状病毒（2019-nCoV）肺炎

## 应急科研专项

# 申请书

课题名称：公共卫生科普宣传干预对稳定民众心理的大数据研究

申请者：杨 芊

申请单位：浙江大学医学院公共卫生学系

联系手机：18758181126

申请日期：2020年2月1日

浙江大学教育基金会

二〇二〇年制

## 一、承担单位

| 第一申请单位 |                |     |             |    |
|--------|----------------|-----|-------------|----|
| 单位名称   | 浙江大学医学院公共卫生学系  |     |             |    |
| 通讯地址   | 紫金港小区医学院综合楼    | 邮编  | 310058      |    |
| 联系电话   | 0571-8820 8099 | 联系人 | 曾玉航         |    |
| 合作单位   |                |     |             |    |
| 序号     | 单位名称           | 联系人 | 联系电话        | 职责 |
| 1      | 北京大学           | 王垒  | 13601022301 |    |
| 2      |                |     |             |    |
| 3      |                |     |             |    |

## 二、项目组成员

| 项目负责人  |               |          |       |                    |                       |
|--------|---------------|----------|-------|--------------------|-----------------------|
| 姓名     | 杨芊            |          | 身份证号  | 42282219830514002X |                       |
| 出身年月   | 1983年5月       |          | 手机    | 18758181126        |                       |
| 职务     | 副教授           |          | 专业    | 社会心理学              |                       |
| 学历     | 研究生           |          | 学位    | 博士                 |                       |
| 工作单位   | 浙江大学医学院公共卫生学系 |          |       |                    |                       |
| 项目参与成员 |               |          |       |                    |                       |
| 序号     | 姓名            | 出生年月     | 职称    | 工作单位               | 项目分工                  |
| 1      | 吴息凤           | 1963年4月  | 教授    | 浙江大学医学院公共卫生学系      | 项目规划, 资源协调            |
| 2      | 王垒            | 1968年5月  | 教授    | 北京大学心理与认知科学学院      | 问卷设计指导, 数据嵌入收集        |
| 3      | 徐欣            | 1988年1月  | 研究员   | 浙江大学医学院公共卫生学系      | 项目规划, 问卷设计, 数据分析及论文写作 |
| 4      | 张克俊           | 1979年4月  | 副教授   | 浙江大学计算机科学与技术学院     | 数据挖掘, 云计算, 机器情感分析     |
| 5      | 叶元庆           | 1977年1月  | 研究员   | 浙江大学医学院公共卫生学系      | 大数据计算, 模型建立           |
| 6      | 吴健            | 1975年10月 | 教授    | 浙江大学医学院公共卫生学系      | 大数据分析, 技术指导           |
| 7      | 宋海东           | 1970年4月  | 副主任医师 | 杭州市第七人民医院          | 心理健康干预和评估             |

|   |     |         |    |             |              |
|---|-----|---------|----|-------------|--------------|
| 8 | 张川霞 | 1983年5月 | 中级 | 浙江大学党委宣传部   | 宣传渠道管理, 数据获取 |
| 9 | 张紫徽 | 1975年9月 | 无  | 浙江大学信息与技术中心 | 平台沟通协作, 数据获取 |

For peer review only

## 项目名称：公共卫生科普宣传干预对稳定民众心理的大数据研究

### 摘要：

**正文：**参照以下提纲撰写，要求内容翔实、清晰，层次分明，标题突出。

#### （一）立项依据与研究内容：

##### 1. 项目的立项依据：

2019年12月中旬以来，中国湖北省武汉市短期内出现了以发热、咳嗽、乏力，呼吸不畅为主要症状的不明原因肺炎病例。各级政府、卫生健康行政主管部门高度重视，快速组织疾控机构、医疗机构和科研院所展开调查、救治和协作攻关，迅速确定这类病例的病原为新型冠状病毒，世界卫生组织（WHO）确认并命名为2019-nCoV，该病原感染所致的肺炎称为新型冠状病毒感染引起的肺炎。

公共卫生是“通过社会的有组织努力来预防疾病，延长寿命和促进健康的艺术和科学”。其工作范围包括环境卫生、控制传染病、进行个体健康教育、组织医护人员对疾病进行早期诊断和治疗，发展社会体制，保证每个人都享有足以维持健康的生活水平和实现其健康地出生和长寿。在传染病的防治中，公共卫生专家的角色必不可少。在此次肺炎疫情，公共卫生的贡献不仅仅是病毒检测，2019-nCoV的特点是毒性弱而传染性强，未表现出症状的潜伏期感染者也具有传染性，且2019-nCoV作为烈性传染病，其特效药和疫苗的开发具有相对长的周期，这决定了防控工作的重点放在了科学地识别、上报和隔离上。

因此，这次疫情防控的希望是切断传播，所以要谨防恐慌，号召居家隔离、在有效利用医疗资源的前提下促进健康行为。近期有很多网络评论地方政府失能造成事件升级，但对于政府在疫情这种突发性公共卫生事件的情景下，明确多少程度的真相披露老百姓是可以承受的，不会引起恐慌，但足以引起重视；以及对不同人群采取合适的宣传途径和方式，对政府采取合理的公卫宣传措施、增进公信力、维护社会稳定和促进防控工作是非常有指导意义的。

新型冠状病毒（以下简称为新冠病毒）感染的肺炎给人民健康带来了严重威胁。为了增进大众以及有关专业人员对新冠病毒的认识和

理解, 指导个人防护, 降低传播风险, 从 2020 年 1 月 25 日起, 以浙江大学公共卫生学院为首开始了一些列针对公众的科普宣传, 为疫情防控贡献了很多力量。这些宣传内容包括考虑专门针对负面情绪和认知功能下降的小视频、专门针对本次疫情细节的《50 个防控关键问题》问答宣传、大众自我居家防护行为、学在浙大平台的疫情知识网络课程、杭州电视台的疫情解读及预测系列访谈等等。

本项目希望能评估公卫科普宣传的效果, 包括不同宣传途径和平台, 比如媒, 手机 (微信朋友圈、QQ、各大网络平台), 电脑, 电视, 或者河南乡下那种敲锣打鼓的公卫宣传, 对疫情的健康行为信息起到的接受和依从效果 (normless behavior), 以及心理健康反应 (恐慌, 应激和创伤后成长)。

拟通过建立突发公共卫生事件中的心理行为社会学模型, 为不同年龄、受教育程度、居住地、感染状态的人群设立最合适的公卫宣传教育途径, 最大化信息接收效果、促进健康行为的依从、防止社会恐慌、促进创伤后成长、保护医务人员、增加政府公信力、为政府谏言最合理的公卫宣传社会治理方式。

## 2. 项目的研究内容 (包括研究方案、可行性分析, 以及拟解决的关键科学问题)

### 2.1 研究模块:

本项目的研究主要包括以下几个模块:

**模块一 公共卫生科普宣传的信息接受渠道和防控效果的大数据调查。**拟利用大数据的分析方法, 探究占主流地位的公共卫生宣传的信息接受渠道并建立与不同等级疫区活动匹配的大数据模型。

**模块二 公共卫生科普宣传渠道和疫情人群匹配的大数据模型建立。**拟评估公卫科普宣传在心理健康、健康知识信念和公信力提升方面的效果。

**模块三 基于阿里大数据平台的公卫宣传模型的防控效果研究。**基于阿里集团的支付和便民平台, 针对不同疫区和感染状态的民众活动精准推送公卫宣传科普信息, 并验证防控效果

### 2.2 拟解决的关键科学问题



本课题主要拟解决以下关键科学问题：

2.3.1 不同信息传播渠道或途径中民众的接受程度分别如何？不同疫情地区、不同角色和不同感染状况的人群分别偏好哪一种或哪几种途径的公卫宣传途径？

2.3.2 不同公卫科普宣传的传播途径在不同疫情地区、不同角色和不同感染状况的人群中的传播效果有何差异？组合的选项有哪些？对于心理健康、行为健康知识信念和公信力的效果促进是最好的？

2.3.3 本项目所提出的公共卫生宣传的大数据模型，在阿里的支付和便民平台上推广后，是否能收获好的防控治理效果？需要做哪些优化与完善？

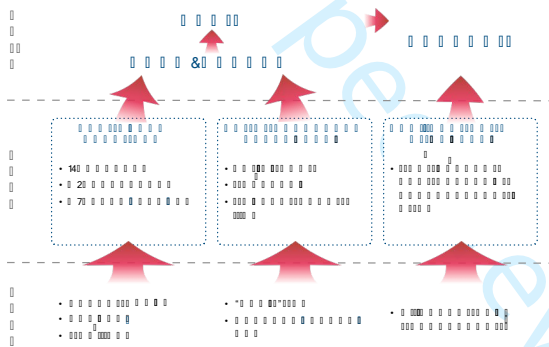

图 1 研究流程技术路线图

### 3. 本项目的特色与创新之处；

3.1. 立项基础深厚扎实--本项目是基于目前浙大公卫学院在本次疫情防控工作中宣传工作的标杆作用，继续深度展开。浙大公卫在本次疫情防控工作中火速响应、全心投入，为大众科普防控知识、减轻大众心情压力、提倡积极行为与健康生活方式作出了大量贡献。

3.2. 研究内容独具特色--该项目不仅仅是对大众心理健康的调查，更是突破表层心理反应，去深究大众媒体以及大众获得信息渠道的差异对心理的影响。充分体现了时代的特征。

针对大众心理健康及心理疏导的很多。各大高校和科研机构都已开展了疫情防控的心理学调查。然而，除考虑疫情本身对心理的影响外，在当下的海量信息时代，疫情信息的带来的心理健康问题也不容忽视。信息的来源、内容的真伪、信息传播的途径等关键因素都会影



响大众对疫情发展和国家防控工作效率的判断。而这些判断，则会进一步影响大众的心理健康。

3.3. 研究团队交叉多样化—本项目齐聚多专业，多领域的专家，充分体现了交叉学科的优势。本项目由公卫学院牵头，计算机学院、传媒学院、宣传部、信息技术部鼎力支持，还有北京大学的科研团队配合。在科研实力、实践操作和数据平台方面具有优势。这为项目的转化提供了支撑，方便指导今后公卫突发事件的科普精准宣传和心理疏导工作。

#### 4. 进度安排及预期研究结果。

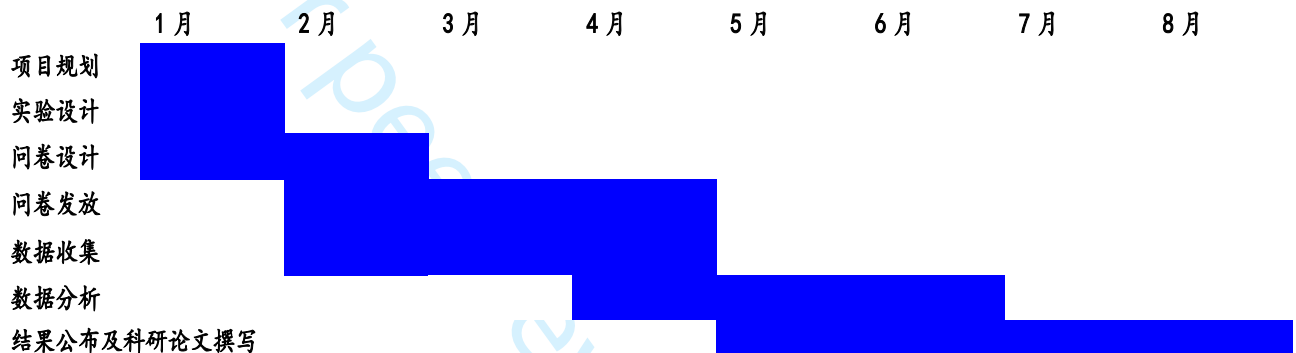

#### (二) 研究基础与工作条件

1. 已取得的研究工作基础积累及水平，包括创新性研究成果、在国内外同行中的水平及优势；

##### 1.1. 在国内外同行中的水平及优势

项目申请人目前身处湖北疫区，对此次危机，尤其是宣传带来的心理健康和行为模式影响有深刻的切身体会。虽然不少高校的研究团队受疫情互联网传播的启发，开展相关研究，但浙江大学公共卫生学院行动最为迅捷、宣传力度最大，不仅在自己的疫情防控平台上进行了科普宣传，还通过浙江大学官方微博和钱江财经频道、人民网、科学网等等新媒体平台发布了一系列针对疫情的公共卫生宣传，甚至建立了自己的疫情平台，本项目的核心成员均担任浙大疫情宣传的核心策划与制作人。

表 1 浙江大学公共卫生学院已发布的疫情相关宣传科普信息

| 信息类型 | 标题                 | 主创/嘉宾      | 日期       |
|------|--------------------|------------|----------|
| 视频   | 新型冠状病毒感染的肺炎疫情防控小知识 | 杨芊         | 1.2<br>7 |
| 文章   | 50个防控关键问题          | 朱益民        | 2.1      |
| 视频   | 这些居家小细节，祝您远离病毒     | 徐欣、吴息凤     | 2.2      |
| 电视直播 | 众志成城，防控疫情          | 吴息凤、宋海东等   | 2.2      |
| 视频   | “终于来了！轮到我宅家立功了！”   | 杨芊、吴息凤、张克俊 | 2.3      |
| 视频   | 疫情面前显担当            | 赵灿、吴息凤     | 2.4      |
| 视频   | 隔离在家不知所措，浙大家齐来帮你   | 杨芊、吴息凤、张克俊 | 2.5      |
| 视频   | 心理疏导有干货，浙大家齐来教你    | 杨芊、吴息凤、张克俊 | 2.5      |
| 视频   | 预防新冠肺炎饮食须知         | 杨敏         | 2.6      |

申请人及课题组核心成员有浙江大学流行病学和大数据研究的重量级专家教授和百人研究员，也有来自北京大学心理学院自非典以后就主持国家级公共卫生应急项目的心理学专家教授，还有两位具有计算机科学技术专业背景，擅长数据挖掘、云计算、情感分析的教授和专家。研究团队长期从事公共卫生心理健康、健康行为、公共卫生应急管理、大数据的理论和实证研究，并且在这些领域有着较为丰富的学术成果（见 1.3 创新性研究成果部分）。

## 1.2. 已取得的研究工作基础累积及水平

### 1.2.1 面向公众的公共卫生科普宣传途径和效果的大数据研究

以政府宣传手册和《第44次中国互联网发展统计报告》等官方材料为依据,项目组已对常见的面向公众的公共卫生科普宣传途径进行科学分类,开发针对信息接受渠道的问题,并完成了疫情相关的大数据调查,覆盖全国所有省份,第一轮回收网络平台有效问卷2000多。

本项目合作方北京大学心理与行为科学院的研究团队从1月31日开始收集基线数据,开展为期14天的问卷跟踪研究。而浙江大学从数据收集的第2天开始在浙江大学官方微博、人民网、科学网等主流媒体陆续上线本团队策划的针对本次疫情的公共卫生科普宣传视频、文章,并与杭州文广集团合作电视节目等科普信息。

同时,本项目已从跟踪研究的第7天开始,嵌入面向公众的公共卫生科普宣传途径和效果有关信息接受渠道的问题。并另外采取滚雪球的问卷发放方法收集信息渠道和与防控效果有关的问卷数据,包括抑郁和焦虑的权威性心理健康标准化量表、社会支持标准化量表、甄别谣言和科学行为健康信息的判断题和有关政府公信力和医院关系的问题。

相关数据将与模块二的数据进行交叉分析,为建立公共卫生科普宣传的信息接受渠道与不同等级疫区活动匹配的大数据模型提供依据。

### 1.2.2 基于高校网课平台的公共卫生科普课程和防控效果研究

疫情期间,很多学校都推迟了开学,然而科研和学习不应该中断。浙江大学信息技术中心面对目前师生居家不便外出的特殊情况,为在做好线上防疫工作、时刻保障师生返校前后激增的信息化需求,在“学在浙大”网络平台上上线了一些列有防疫期特色的网络课程,其中,包括项目申请人主讲的《新型冠状病毒肺炎科普》,利用学在浙大平台覆盖全校师生用户的传播力,已设计好将模块一所涉及到的变量调查放在学在浙大平台进行施测,并进行课前课后比较和上过课 vs 没上过课的匹配对照比较,提供不同学科、不同年龄、不同隔离状况和疫区的学生的心理、行为、思想等防控数据,为模块一的模型构建提

供补充。

### 1.2.3 基于阿里集团的支付和便民平台的大数据科普投放研究

阿里集团旗下有支付宝、淘宝等支付平台和医疗、健康等便民平台，这些数据为我们精准区分不同疫情地区、不同角色和不同感染状况的人的活动空间、时间和重要生活活动提供了支撑。基于上述两项研究中构建的模型，在进行公共卫生科普宣传时，本项目会根据不同疫情地区、不同角色和不同感染状况的人针对性地筛选和制作科普材料和宣传方案，以此来获得心理健康、行为健康和稳定民心的综合防控效果。

### 1.3. 创新性研究成果

本团队共计主持省级以上基础研究计划项目数百项，合计经费超过1亿美金，篇幅所限每位参与者仅列与项目最相关的3项。

#### 杨芊主持的项目：

- 1) 国家自然科学基金面上项目，71974170，医患关系中“替罪羊”效应的消减与社会心理治理研究，2020/01-2023/12，48.5万元。
- 2) 国家自然科学基金青年科学基金项目，71603233，“替罪羊”理论对社会转型时期患方医暴倾向心理机制的解释和干预研究，2017/01-2019/12，17万元。
- 3) The International Union Against Tuberculosis and Lung Disease, China-RI1-15, Tobacco Control Courses in Smoke-free Universities with Public Health Faculties, 2010/01-2011/12, \$199,855。

#### 吴息凤主持的项目：

- 1) Principal Investigator, Molecular Pathways Linking Obesity and RCC Tumorigenesis (PQ1), R01 CA170298, NIH/NCI, 9/1/2012-6/30/2018, ~\$2,800,000
- 2) Multiple Principal Investigator, Transdisciplinary Research in Cancer of the Lung (TRICL), U19 CA148127, NIH/NCI, 7/9/2010-6/30/2014, ~\$4,559,755

- 3) Principal Investigator, Genome-Wide Association Analysis of Bladder Cancer, U01 CA127615, NIH/NCI, 4/1/2008–3/31/2015, ~\$4,803,014

**王垒主持的代表性项目：**

- 1) 国家自然科学基金重大研究计划集成项目“非常规突发事件应急项目”子课题
- 2) Co-PI: 国家自然科学基金重大项目, 91224008, 非常规突发事件应急管理基础科学问题与“情景-应对”型总集成升华平台研究, 2013/01–2016/12, 1500 万元。
- 3) Co-PI: 国家自然科学基金重大项目, 91324201, 非常规突发事件下社会群体心理与行为变化规律和机制, 2014/01–2016/12, 200 万元。

**吴健主持的项目：**

- 1) PI: 国家自然科学基金面上项目, 61672453, 移动互联网环境下的 API 发现与聚合研究, 2017/01–2020/12, 63 万元。
- 2) National Science and Technology Supporting Program of China, 2015BAH18F02 (国家科技支撑计划资助项目基金)
- 3) National Key Science and Technology Research Program of China, 2013AA01A604 (国家科技攻关计划)

**叶元庆主持的项目：**

- 1) PI: Next generation sequencing to identify novel colorectal cancer genes, R01 CA177935, NIH/NCI, PI - Multiple PI mechanism with Yuanqing Ye as contact PI and Chad Huff as co-PI, 2014/06–2019/04, \$3,314,158.
- 2) PI: Predicting the risk of developing lung cancer: A multigenic statistical approach to microRNA, Duncan Family Institute - Seed Funding Research Program Grant, Duncan Family Institute for Cancer Prevention and Risk Assessment, 2010/03–2012/02,



\$100,000

- 3) PI: A pilot study of global serum metabolomic profiling and lung cancer risk, P50 CA070907, UT SPORE in Lung Cancer Development Award, 2011/11-2012/04, \$23,750

#### 张克俊主持的项目

- 1) 2019-2022 浙江省重点自然科学基金，多模态数据驱动的音乐积极情感反馈与生成模型研究，负责人 2014-2018 中国工程科技知识中心，创新设计知识服务系统，子课题负责人
- 2) 2016-2019 国家重点研发计划课题，大数据驱动的气溶胶光学物理属性统计与分析，负责人
- 3) 2014-2016 国家自然科学基金，基于云模型的音乐情感表示与识别研究，负责人

#### 徐欣主持的项目：

- 1) PI: NUS-Cambridge Seed Funding, 2017 (SGD 30,000)
- 2) Co-PI: NUS Centre For Healthy Ageing Funding, 2018 (SGD 500,000)

#### 2. 工作条件；

• 本项目合作方北京大学心理与行为科学院的研究团队从 1 月 31 日开始收集基线数据，开展为期 14 天的问卷跟踪研究，为项目的成果开展提供了基线数据、问卷嫁接平台和对比机会。

• 本项目的三位主要参与者都具有计算机科学背景，并与阿里集团签署了数据合作协议，在数据挖掘、云计算、情感分析等方面有坚实的理论、技术和实践基础。为达到精准投放公卫宣传效果最好的信息，并通过阿里的数据平台收集阅读、点赞、使用、评论等用户数据，验证模型的推广使用效果提供了切实的保证。

• 本项目的参与者来自浙江大学宣传部和浙江大学信息技术中心，对于研究对象——公共卫生宣传科普材料——的制作、发行和网络问卷的嵌入和网络行为的跟踪提供了完美的支持。其中，宣传

部将会对接转发的各大媒体平台，信息技术中心旗下的“学在浙大”网课平台将会设计课后练习、计算机学院将会解决微信官网的代码插入，跟踪朋友圈阅读、转发等数据以及网络评论的分析计算等。

• 杭州第七医院在精神卫生和心理健康工作方面有丰富的经验，而且拥有隔离病房。其它团队成员具有良好的科研素质和相关领域的项目经验、研究成果。梯队构成合理，团队的科研实力能够保证课题的有效开展和顺利完成。

### (三) 资金需求与预算

资金预算合计 38 万元，说明如下：

1. 设备费 9 万元，用于模型计算和数据存储的服务器购买。
2. 材料费 1.5 万元，主要用于购买与项目相关的纸质和电子书籍、文献等材料。其中 0.5 万元拨付给合作单位，用于调查相关开支。
3. 差旅费 0.5 万元，用于调研人员在市内调研时产生的出行费用，如出租车和其他公共交通的支出。
4. 出版/文献/信息传播/知识产权事务费 10 万元：用于论文发表的期刊版面费，以及利用问卷星、阿里、浙大的网络平台收集数据。
5. 劳务费 12 万元：本课题主要依赖宣传材料的制作与干预。因此，其中 10 万元用于发放给包括宣传材料制作的策划、文案、配音、拍摄、后期制作。项目研究过程中支付给项目组成员中没有工资性收入的在校研究生、访问学者和临时聘用人员的劳务费用，以及临时聘用人员的社会保险补助费用。另外 2 万元拨给合作单位用于收集数据。
6. 专家咨询费 2 万元：用于德向全球著名市场研究公司购买市场调研服务支持以及新媒体数据监测报告。此次项目中，如向尼尔森和华数传媒购买直播节目中的观众数据库以及基于机顶盒的数据分析以家庭为单位的用户特征分析报告约 2 万元。
7. 其他支出 3 万元：通过问卷星平台充值到问卷中，以微信红包的形式发放给问卷填写者作为填写的报酬，约 3 万元。

1  
2  
3  
4 8. 合作单位拨款 2.5 万：其中材料费 0.5 万元，劳务费 2 万元。  
5  
6  
7  
8  
9  
10  
11  
12  
13  
14  
15  
16  
17  
18  
19  
20  
21  
22  
23  
24  
25  
26  
27  
28  
29  
30  
31  
32  
33  
34  
35  
36  
37  
38  
39  
40  
41  
42  
43  
44  
45  
46  
47  
48  
49  
50  
51  
52  
53  
54  
55  
56  
57  
58  
59  
60

For peer review only



# Reporting checklist for cross sectional study.

Based on the STROBE cross sectional guidelines.

## Instructions to authors

Complete this checklist by entering the page numbers from your manuscript where readers will find each of the items listed below.

Your article may not currently address all the items on the checklist. Please modify your text to include the missing information. If you are certain that an item does not apply, please write "n/a" and provide a short explanation.

Upload your completed checklist as an extra file when you submit to a journal.

In your methods section, say that you used the STROBE cross sectional reporting guidelines, and cite them as:

von Elm E, Altman DG, Egger M, Pocock SJ, Gotsche PC, Vandenbroucke JP. The Strengthening the Reporting of Observational Studies in Epidemiology (STROBE) Statement: guidelines for reporting observational studies.

|                           |                                                                                                        | Page   |
|---------------------------|--------------------------------------------------------------------------------------------------------|--------|
|                           | Reporting Item                                                                                         | Number |
| <b>Title and abstract</b> |                                                                                                        |        |
| Title                     | <a href="#">#1a</a> Indicate the study's design with a commonly used term in the title or the abstract | 1      |

|    |                      |                     |                                                                 |     |
|----|----------------------|---------------------|-----------------------------------------------------------------|-----|
| 1  | Abstract             | <a href="#">#1b</a> | Provide in the abstract an informative and balanced summary     | 2   |
| 2  |                      |                     | of what was done and what was found                             |     |
| 3  |                      |                     |                                                                 |     |
| 4  |                      |                     |                                                                 |     |
| 5  |                      |                     |                                                                 |     |
| 6  | <b>Introduction</b>  |                     |                                                                 |     |
| 7  |                      |                     |                                                                 |     |
| 8  |                      |                     |                                                                 |     |
| 9  |                      |                     |                                                                 |     |
| 10 | Background /         | <a href="#">#2</a>  | Explain the scientific background and rationale for the         | 3   |
| 11 | rationale            |                     | investigation being reported                                    |     |
| 12 |                      |                     |                                                                 |     |
| 13 |                      |                     |                                                                 |     |
| 14 |                      |                     |                                                                 |     |
| 15 | Objectives           | <a href="#">#3</a>  | State specific objectives, including any prespecified           | 3   |
| 16 |                      |                     | hypotheses                                                      |     |
| 17 |                      |                     |                                                                 |     |
| 18 |                      |                     |                                                                 |     |
| 19 |                      |                     |                                                                 |     |
| 20 | <b>Methods</b>       |                     |                                                                 |     |
| 21 |                      |                     |                                                                 |     |
| 22 |                      |                     |                                                                 |     |
| 23 | Study design         | <a href="#">#4</a>  | Present key elements of study design early in the paper         | 4   |
| 24 |                      |                     |                                                                 |     |
| 25 |                      |                     |                                                                 |     |
| 26 | Setting              | <a href="#">#5</a>  | Describe the setting, locations, and relevant dates, including  | 4   |
| 27 |                      |                     | periods of recruitment, exposure, follow-up, and data           |     |
| 28 |                      |                     | collection                                                      |     |
| 29 |                      |                     |                                                                 |     |
| 30 |                      |                     |                                                                 |     |
| 31 |                      |                     |                                                                 |     |
| 32 |                      |                     |                                                                 |     |
| 33 |                      |                     |                                                                 |     |
| 34 | Eligibility criteria | <a href="#">#6a</a> | Give the eligibility criteria, and the sources and methods of   | 4   |
| 35 |                      |                     | selection of participants.                                      |     |
| 36 |                      |                     |                                                                 |     |
| 37 |                      |                     |                                                                 |     |
| 38 |                      |                     |                                                                 |     |
| 39 |                      |                     |                                                                 |     |
| 40 |                      | <a href="#">#7</a>  | Clearly define all outcomes, exposures, predictors, potential   | n/a |
| 41 |                      |                     | confounders, and effect modifiers. Give diagnostic criteria, if |     |
| 42 |                      |                     | applicable                                                      |     |
| 43 |                      |                     |                                                                 |     |
| 44 |                      |                     |                                                                 |     |
| 45 |                      |                     |                                                                 |     |
| 46 |                      |                     |                                                                 |     |
| 47 | Data sources /       | <a href="#">#8</a>  | For each variable of interest give sources of data and details  | 4   |
| 48 | measurement          |                     | of methods of assessment (measurement). Describe                |     |
| 49 |                      |                     | comparability of assessment methods if there is more than       |     |
| 50 |                      |                     | one group. Give information separately for for exposed and      |     |
| 51 |                      |                     | unexposed groups if applicable.                                 |     |
| 52 |                      |                     |                                                                 |     |
| 53 |                      |                     |                                                                 |     |
| 54 |                      |                     |                                                                 |     |
| 55 |                      |                     |                                                                 |     |
| 56 |                      |                     |                                                                 |     |
| 57 |                      |                     |                                                                 |     |
| 58 |                      |                     |                                                                 |     |
| 59 |                      |                     |                                                                 |     |
| 60 |                      |                     |                                                                 |     |

|    |                |                      |                                                               |     |
|----|----------------|----------------------|---------------------------------------------------------------|-----|
| 1  | Bias           | <a href="#">#9</a>   | Describe any efforts to address potential sources of bias     | 4   |
| 2  |                |                      |                                                               |     |
| 3  |                |                      |                                                               |     |
| 4  | Study size     | <a href="#">#10</a>  | Explain how the study size was arrived at                     | 5   |
| 5  |                |                      |                                                               |     |
| 6  |                |                      |                                                               |     |
| 7  | Quantitative   | <a href="#">#11</a>  | Explain how quantitative variables were handled in the        | 5   |
| 8  | variables      |                      | analyses. If applicable, describe which groupings were        |     |
| 9  |                |                      | chosen, and why                                               |     |
| 10 |                |                      |                                                               |     |
| 11 |                |                      |                                                               |     |
| 12 |                |                      |                                                               |     |
| 13 |                |                      |                                                               |     |
| 14 |                |                      |                                                               |     |
| 15 | Statistical    | <a href="#">#12a</a> | Describe all statistical methods, including those used to     | 4   |
| 16 | methods        |                      | control for confounding                                       |     |
| 17 |                |                      |                                                               |     |
| 18 |                |                      |                                                               |     |
| 19 |                |                      |                                                               |     |
| 20 | Statistical    | <a href="#">#12b</a> | Describe any methods used to examine subgroups and            | 5   |
| 21 | methods        |                      | interactions                                                  |     |
| 22 |                |                      |                                                               |     |
| 23 |                |                      |                                                               |     |
| 24 |                |                      |                                                               |     |
| 25 |                |                      |                                                               |     |
| 26 | Statistical    | <a href="#">#12c</a> | Explain how missing data were addressed                       | 5   |
| 27 | methods        |                      |                                                               |     |
| 28 |                |                      |                                                               |     |
| 29 |                |                      |                                                               |     |
| 30 |                |                      |                                                               |     |
| 31 | Statistical    | <a href="#">#12d</a> | If applicable, describe analytical methods taking account of  | n/a |
| 32 | methods        |                      | sampling strategy                                             |     |
| 33 |                |                      |                                                               |     |
| 34 |                |                      |                                                               |     |
| 35 |                |                      |                                                               |     |
| 36 | Statistical    | <a href="#">#12e</a> | Describe any sensitivity analyses                             | n/a |
| 37 | methods        |                      |                                                               |     |
| 38 |                |                      |                                                               |     |
| 39 |                |                      |                                                               |     |
| 40 |                |                      |                                                               |     |
| 41 |                |                      |                                                               |     |
| 42 | <b>Results</b> |                      |                                                               |     |
| 43 |                |                      |                                                               |     |
| 44 |                |                      |                                                               |     |
| 45 | Participants   | <a href="#">#13a</a> | Report numbers of individuals at each stage of study—eg       | 5   |
| 46 |                |                      | numbers potentially eligible, examined for eligibility,       |     |
| 47 |                |                      | confirmed eligible, included in the study, completing follow- |     |
| 48 |                |                      | up, and analysed. Give information separately for for         |     |
| 49 |                |                      | exposed and unexposed groups if applicable.                   |     |
| 50 |                |                      |                                                               |     |
| 51 |                |                      |                                                               |     |
| 52 |                |                      |                                                               |     |
| 53 |                |                      |                                                               |     |
| 54 |                |                      |                                                               |     |
| 55 |                |                      |                                                               |     |
| 56 |                |                      |                                                               |     |
| 57 | Participants   | <a href="#">#13b</a> | Give reasons for non-participation at each stage              | 5   |
| 58 |                |                      |                                                               |     |
| 59 |                |                      |                                                               |     |
| 60 |                |                      |                                                               |     |

|    |                   |                      |                                                                   |     |
|----|-------------------|----------------------|-------------------------------------------------------------------|-----|
| 1  | Participants      | <a href="#">#13c</a> | Consider use of a flow diagram                                    | n/a |
| 2  |                   |                      |                                                                   |     |
| 3  |                   |                      |                                                                   |     |
| 4  | Descriptive data  | <a href="#">#14a</a> | Give characteristics of study participants (eg demographic,       | 5   |
| 5  |                   |                      | clinical, social) and information on exposures and potential      |     |
| 6  |                   |                      | confounders. Give information separately for exposed and          |     |
| 7  |                   |                      | unexposed groups if applicable.                                   |     |
| 8  |                   |                      |                                                                   |     |
| 9  |                   |                      |                                                                   |     |
| 10 |                   |                      |                                                                   |     |
| 11 |                   |                      |                                                                   |     |
| 12 |                   |                      |                                                                   |     |
| 13 |                   |                      |                                                                   |     |
| 14 | Descriptive data  | <a href="#">#14b</a> | Indicate number of participants with missing data for each        | 5   |
| 15 |                   |                      | variable of interest                                              |     |
| 16 |                   |                      |                                                                   |     |
| 17 |                   |                      |                                                                   |     |
| 18 |                   |                      |                                                                   |     |
| 19 | Outcome data      | <a href="#">#15</a>  | Report numbers of outcome events or summary measures.             | 4   |
| 20 |                   |                      | Give information separately for exposed and unexposed             |     |
| 21 |                   |                      | groups if applicable.                                             |     |
| 22 |                   |                      |                                                                   |     |
| 23 |                   |                      |                                                                   |     |
| 24 |                   |                      |                                                                   |     |
| 25 |                   |                      |                                                                   |     |
| 26 |                   |                      |                                                                   |     |
| 27 | Main results      | <a href="#">#16a</a> | Give unadjusted estimates and, if applicable, confounder-         | 6   |
| 28 |                   |                      | adjusted estimates and their precision (eg, 95% confidence        |     |
| 29 |                   |                      | interval). Make clear which confounders were adjusted for         |     |
| 30 |                   |                      | and why they were included                                        |     |
| 31 |                   |                      |                                                                   |     |
| 32 |                   |                      |                                                                   |     |
| 33 |                   |                      |                                                                   |     |
| 34 |                   |                      |                                                                   |     |
| 35 |                   |                      |                                                                   |     |
| 36 |                   |                      |                                                                   |     |
| 37 | Main results      | <a href="#">#16b</a> | Report category boundaries when continuous variables were         | 6   |
| 38 |                   |                      | categorized                                                       |     |
| 39 |                   |                      |                                                                   |     |
| 40 |                   |                      |                                                                   |     |
| 41 |                   |                      |                                                                   |     |
| 42 | Main results      | <a href="#">#16c</a> | If relevant, consider translating estimates of relative risk into | n/a |
| 43 |                   |                      | absolute risk for a meaningful time period                        |     |
| 44 |                   |                      |                                                                   |     |
| 45 |                   |                      |                                                                   |     |
| 46 |                   |                      |                                                                   |     |
| 47 |                   |                      |                                                                   |     |
| 48 | Other analyses    | <a href="#">#17</a>  | Report other analyses done—e.g., analyses of subgroups            | 6   |
| 49 |                   |                      | and interactions, and sensitivity analyses                        |     |
| 50 |                   |                      |                                                                   |     |
| 51 |                   |                      |                                                                   |     |
| 52 |                   |                      |                                                                   |     |
| 53 | <b>Discussion</b> |                      |                                                                   |     |
| 54 |                   |                      |                                                                   |     |
| 55 |                   |                      |                                                                   |     |
| 56 | Key results       | <a href="#">#18</a>  | Summarise key results with reference to study objectives          | 7   |
| 57 |                   |                      |                                                                   |     |
| 58 |                   |                      |                                                                   |     |
| 59 |                   |                      |                                                                   |     |
| 60 |                   |                      |                                                                   |     |

|    |                          |                     |                                                                |     |
|----|--------------------------|---------------------|----------------------------------------------------------------|-----|
| 1  | Limitations              | <a href="#">#19</a> | Discuss limitations of the study, taking into account sources  | 9   |
| 2  |                          |                     | of potential bias or imprecision. Discuss both direction and   |     |
| 3  |                          |                     | magnitude of any potential bias.                               |     |
| 4  |                          |                     |                                                                |     |
| 5  |                          |                     |                                                                |     |
| 6  |                          |                     |                                                                |     |
| 7  |                          |                     |                                                                |     |
| 8  |                          |                     |                                                                |     |
| 9  | Interpretation           | <a href="#">#20</a> | Give a cautious overall interpretation considering objectives, | 7-9 |
| 10 |                          |                     | limitations, multiplicity of analyses, results from similar    |     |
| 11 |                          |                     | studies, and other relevant evidence.                          |     |
| 12 |                          |                     |                                                                |     |
| 13 |                          |                     |                                                                |     |
| 14 |                          |                     |                                                                |     |
| 15 |                          |                     |                                                                |     |
| 16 | Generalisability         | <a href="#">#21</a> | Discuss the generalisability (external validity) of the study  | 9   |
| 17 |                          |                     | results.                                                       |     |
| 18 |                          |                     |                                                                |     |
| 19 |                          |                     |                                                                |     |
| 20 |                          |                     |                                                                |     |
| 21 |                          |                     |                                                                |     |
| 22 | <b>Other Information</b> |                     |                                                                |     |
| 23 |                          |                     |                                                                |     |
| 24 |                          |                     |                                                                |     |
| 25 | Funding                  | <a href="#">#22</a> | Give the source of funding and the role of the funders for the | 10  |
| 26 |                          |                     | present study and, if applicable, for the original study on    |     |
| 27 |                          |                     | which the present article is based                             |     |
| 28 |                          |                     |                                                                |     |
| 29 |                          |                     |                                                                |     |
| 30 |                          |                     |                                                                |     |
| 31 |                          |                     |                                                                |     |
| 32 |                          |                     |                                                                |     |

33 None The STROBE checklist is distributed under the terms of the Creative Commons Attribution  
34 License CC-BY. This checklist can be completed online using <https://www.goodreports.org/>, a tool  
35 made by the [EQUATOR Network](#) in collaboration with [Penelope.ai](#)  
36  
37  
38  
39  
40  
41  
42  
43  
44  
45  
46  
47  
48  
49  
50  
51  
52  
53  
54  
55  
56  
57  
58  
59  
60

# BMJ Open

## Behavioural Compliance with Personal Protection Among Chinese Community-Dwellers During COVID-19: Correlates and Indicators

|                                 |                                                                                                                                                                                                                                                                                                                                                                                                                                                                                   |
|---------------------------------|-----------------------------------------------------------------------------------------------------------------------------------------------------------------------------------------------------------------------------------------------------------------------------------------------------------------------------------------------------------------------------------------------------------------------------------------------------------------------------------|
| Journal:                        | <i>BMJ Open</i>                                                                                                                                                                                                                                                                                                                                                                                                                                                                   |
| Manuscript ID                   | bmjopen-2020-041453.R1                                                                                                                                                                                                                                                                                                                                                                                                                                                            |
| Article Type:                   | Original research                                                                                                                                                                                                                                                                                                                                                                                                                                                                 |
| Date Submitted by the Author:   | 09-Sep-2020                                                                                                                                                                                                                                                                                                                                                                                                                                                                       |
| Complete List of Authors:       | Xu, Xin; Zhejiang University School of Public Health; National University Singapore Yong Loo Lin School of Medicine<br>Chew, Kimberly; National University Singapore Yong Loo Lin School of Medicine<br>Wu, Zhihua; Zhejiang University School of Public Health<br>Xiao, Xiaohua; Zhejiang University School of Public Health<br>Yang, Qian; Zhejiang University School of Public Health; Zhejiang University School of Medicine Children's Hospital, Department of Endocrinology |
| <b>Primary Subject Heading</b>: | Public health                                                                                                                                                                                                                                                                                                                                                                                                                                                                     |
| Secondary Subject Heading:      | Infectious diseases, Global health                                                                                                                                                                                                                                                                                                                                                                                                                                                |
| Keywords:                       | Public health < INFECTIOUS DISEASES, Demography < TROPICAL MEDICINE, EPIDEMIOLOGY                                                                                                                                                                                                                                                                                                                                                                                                 |
|                                 |                                                                                                                                                                                                                                                                                                                                                                                                                                                                                   |

SCHOLARONE™  
Manuscripts



I, the Submitting Author has the right to grant and does grant on behalf of all authors of the Work (as defined in the below author licence), an exclusive licence and/or a non-exclusive licence for contributions from authors who are: i) UK Crown employees; ii) where BMJ has agreed a CC-BY licence shall apply, and/or iii) in accordance with the terms applicable for US Federal Government officers or employees acting as part of their official duties; on a worldwide, perpetual, irrevocable, royalty-free basis to BMJ Publishing Group Ltd ("BMJ") its licensees and where the relevant Journal is co-owned by BMJ to the co-owners of the Journal, to publish the Work in this journal and any other BMJ products and to exploit all rights, as set out in our [licence](#).

The Submitting Author accepts and understands that any supply made under these terms is made by BMJ to the Submitting Author unless you are acting as an employee on behalf of your employer or a postgraduate student of an affiliated institution which is paying any applicable article publishing charge ("APC") for Open Access articles. Where the Submitting Author wishes to make the Work available on an Open Access basis (and intends to pay the relevant APC), the terms of reuse of such Open Access shall be governed by a Creative Commons licence – details of these licences and which [Creative Commons](#) licence will apply to this Work are set out in our licence referred to above.

Other than as permitted in any relevant BMJ Author's Self Archiving Policies, I confirm this Work has not been accepted for publication elsewhere, is not being considered for publication elsewhere and does not duplicate material already published. I confirm all authors consent to publication of this Work and authorise the granting of this licence.

1  
2  
3 Behavioural Compliance with Personal Protection Among Chinese Community-Dwellers  
4 During COVID-19: Correlates and Indicators  
5  
6

7 **Xu Xin<sup>1,2</sup>, PhD, Kimberly Ann Chew<sup>2</sup>, BA (Hons), Wu Zhihua<sup>1</sup>, BA, Xiao Xiaohua<sup>1</sup>, BA,**  
8 **Yang Qian<sup>1,3\*</sup>, PhD**  
9

10  
11 *<sup>1</sup>School of Public Health & the 2nd Affiliated Hospital of School of Medicine, Zhejiang*  
12 *University, China*  
13  
14

15 *<sup>2</sup>Yong Loo Lin School of Medicine, National University of Singapore, Singapore*  
16  
17

18 *<sup>3</sup>Department of Endocrinology, the Children's Hospital, Zhejiang University School of*  
19 *Medicine, National Clinical Research Center for Child Health*  
20  
21

22  
23  
24 Corresponding author:  
25

26  
27 Dr. Qian Yang  
28

29 1011 Administrative Building, Zijingang Campus, Zhejiang University, Hangzhou, China,  
30 310058, chianyoung@zju.edu.cn  
31

32  
33 Abstract word count: 220 words  
34

35  
36 Word count: 3109 words  
37

38  
39 Number of figures & tables: 5  
40

41  
42 Key words: covid-19 coronavirus, behavioural compliance, social distancing, personal  
43 protective measures  
44  
45  
46  
47  
48  
49  
50  
51  
52  
53  
54  
55  
56  
57  
58  
59  
60



## ABSTRACT

### *Objectives:*

Examine compliance with personal protective measures in communities for the prevention and control of local transmission of the coronavirus (COVID-19), and explore indicators for such behavioural compliance.

### *Design:*

Cross-sectional design. Data collected in February 2020.

### *Setting:*

Community dwellers in China.

### *Participants:*

2956 participants aged 16 and above completed the study and were included in the analysis.

### *Outcome measures:*

Nationwide COVID-19 survey. Demographics and compliance with four individual major personal protective measures—home quarantine, mask-wearing, temperature-taking and hand-sanitising were collected and recorded. Outbreak severity and timeliness of personal protection order were obtained from the China Centre Disease Control (China CDC) website. Linear and logistic regression models were employed to examine the association between demographic and social indicators and personal behavioural compliance.

### *Results:*

An increasing age ( $\beta$ [95%CI]=0.059[0.003-0.012] and higher regional risk-exposure ( $\beta$  [95%CI]=0.155[0.131-0.209]) were independently associated with higher level of overall behavioural compliance. Males were found the least accordant with home quarantine order, whilst the most compliant with others. Younger adults (<21) abided the least with protective measures, whilst the middle-age group (21-49) was the most compliant group, except for home quarantine order.

### *Conclusion:*

The non-compliance with public health mitigation measures was largely attributed to the male gender, and being in the middle-aged group. In light of ongoing pandemic, public health authorities should tailor the policy implementation to this specific demographic.

### Strengths and limitations of this study

- Extensive data collected during the peak of the COVID-19 outbreak in China ( $n_{\text{completed}} = 2956$ ).
- Data was collected from multiple provinces with various levels of risk exposure to avoid bias in the sample (categorised using the number of confirmed cases reported by China CDC).
- The effect of other demographical variables (e.g., education, occupational status) was limited due to the lack of data.
- Survey was available online only, hence sample was limited to those with access to digital technology and Internet.
- More mental health-related questionnaires (e.g., depression, anxiety) should be collected and analysed as potential indicators for behavioural compliance.

### INTRODUCTION

In light of the coronavirus disease 2019 (COVID-19) outbreak that started in December 2019, the Chinese Government has taken a number of strict mitigation strategies to expedite the tracking, testing and treatment of COVID-19. To prevent and control the transmission of the virus in local communities, the aggressive social distancing order has been enforced nationwide in China as early as from January 25, 2020. Notably, prevention and control measures were implemented in three phases: 1) suspension of intra-city and intercity transportation, and strict control of importation and exportation of COVID-19 cases from Wuhan and other provinces, 2) delaying the severity and rise in cases through several safety measures, 3) decreasing clusters, using standardised protocols and execution of “scientific evidence-based policy”. Examples of such measures include the closure of wet markets, contact tracing, temperature-taking, health declarations, quarantine, disallowing large gatherings, and implementation of strict travel restrictions.<sup>1 2</sup> Through strict compliance of Chinese citizens to the order, social distancing has been proven the most effective measure to ease the rapid spreading of the virus.<sup>3 4</sup>

Among all prevention and control measures, a nationwide movement restriction order was announced by the Chinese government soon after the lockdown of Wuhan city on January 23, 2020. This social distancing order was introduced and enforced subsequently, requiring all citizens to remain at home and avoid most forms of face-to-face social contact when outside.

1  
2  
3 The order was implemented with the recommendation of other personal protective  
4 measurements, such as regular hand sanitising, daily temperature-taking, and mask-wearing.<sup>5</sup>

7 The implementation of the personal protection order was challenging. Social distancing  
8 means staying away from mass gatherings and keeping a distance of 6 feet or 2 meters.<sup>3</sup> Due  
9 to the Chinese New Year celebration, which took place around the same time (January 25,  
10 2020) when the outbreak happened, movements among cities and suburban areas, as well as  
11 family gatherings were inevitable and difficult to contain. Voluntary behavioural intervention  
12 during an infectious disease outbreak, such as social distancing, requires not only sufficient  
13 realisation of the situation severity, but more importantly, determined commitment to such  
14 action from individuals in the community.  
15

21 Hence prior to the enforcement of the nationwide home quarantine order, the Chinese  
22 government announced a series of precautionary regulations, including 1) refusal of entry  
23 into public places without wearing a mask and obtaining a normal body temperature; 2) set-  
24 up of a detailed individual purchase record of fever/cough/flu-related medications in local  
25 pharmacies; 3) screening and a detailed registry of suspected cases with high fever in the  
26 community. The entire enforcement was accompanied by thorough public health education  
27 and promotion which started as early as late January. Violation of the above-mentioned  
28 regulations could result in further investigation or even legal liability.<sup>6</sup>  
29

36 After the implementation of the four personal protective behaviours, including home  
37 quarantine, mask-wearing, temperature-taking, and hand-sanitising, non-compliance would  
38 lead to strict education and immediate correction from various levels of management, ranging  
39 from the street and community, to district and city levels of local authority.  
40

43 The implementation of these personal protective behaviours is necessary. However,  
44 compliance to these actions is not only determined by the severity of the disease, but also a  
45 number of demographic (e.g., gender, age) and interpersonal psychosocial factors.<sup>7 8</sup>  
46 Interestingly, while previous literature have demonstrated that older people and females are  
47 typically more likely to practice protective behaviours in public health emergencies such as  
48 the severe acute respiratory syndrome (SARS) and H1N1 swine flu, the results are mixed.<sup>9 10</sup>  
49 Hence in the present study, we sought to understand the demographic indicators and  
50 correlates of individuals' compliance to social distancing during COVID-19.  
51  
52  
53  
54  
55  
56  
57  
58  
59  
60

## METHODS

### Study design and sampling

With a cross-sectional study design, a nationwide online survey on behavioural compliance during COVID-19 was carried out during February 14-17, 2020, among Chinese citizens in China. Community dwellers aged 16 and above were enrolled in the survey. To avoid bias in the sample, the study team disseminated the survey questionnaire in multiple provinces with different levels of risk exposure. All participants provided electronic informed consent prior to taking the survey. The study protocol was approved by the Ethics Commission of Zhejiang University prior to the commencement of the study and was in accordance with the Declaration of Helsinki. STROBE cross-sectional reporting guidelines were used.<sup>11</sup>

### Questionnaires

De-identified demographic information (age, gender, current living area) was collected.

Outbreak Severity: Severity of the outbreak in each province and regions in all survey areas were sorted into 5 categories according to the confirmed coronavirus cases published on the China Center for Disease Control and Prevention (CDC) website on the day of the survey (February 14, 2020): <100 cases, 100-499 cases, 500-999 cases, 1000-1999 cases, >2000 cases.

Policy Timeliness: Timeliness of the social distancing order implemented by the provincial government was assessed by the length (in days) between the implementation date of the social distancing order to the date of the survey. For those areas where the order was implemented after the survey, the score "0" was granted, e.g. Nei Meng province. Scores were subsequently transformed into fractional rank for analysis purposes.

### Compliance to Mitigation Measures

An individual's compliance with a number of mitigation measures introduced by the local government was defined as:

1. home quarantine, as defined by leaving residential address for  $\leq 1$  in 3 days' time, as per the Chinese government's regulation;
2. mask-wearing, as defined by wearing a mask when leaving the residential address, as per the Chinese government's regulation;

3. daily temperature-taking, as defined by taking one's own temperature at least once every day per the Chinese government's regulation;
4. daily hand-sanitising, as defined by sanitising one's hands with a sanitiser with >75% alcohol per the Chinese government's regulation.

Overall compliance is defined as the sum of compliance score on 4 protective behaviours, rated at 0 (none), 1 (compliant with 1 behaviour), 2 (compliant with 2 behaviours), 3 (compliant with 3 behaviours), and 4 (compliant with all 4 behaviours).

### Statistical Analysis

Linear regression models were employed to examine the association between overall compliance to 4 mitigation measures and demographics, including age as a continuous variable, and gender, as well as social determinants such as regional risk exposure and days to regional implementation of mitigation measures. Logistic regression models were applied to investigate the indicators for accordance with each individual mitigation measure. All analyses were performed using SPSS version 25 software, and statistical significance was determined as two-tailed  $p$ -value  $< 0.05$ . Bonferroni correction was employed to obtain an adjusted significance level for each protective behaviour:  $\approx 0.05/4 = 0.0125$ .

### Patient and Public Involvement

No patients and none of the public were involved in the study planning, design and interpretation of results. Results from the paper will be disseminated to the general public through online article format.

## RESULTS

A total of 3,000 participants completed the survey, among whom, 7 had incomplete data and 37 had repeated answers and were removed from the dataset, leaving a total of 2,956 in the current analysis. All 2,956 subjects completed all questionnaires in the survey. Sample descriptives are in Table 1.

Table 1. Study sample descriptives

|                                                                         | Whole Sample | Range |
|-------------------------------------------------------------------------|--------------|-------|
| <i>Demographics</i>                                                     |              |       |
| Age (mean±SD)                                                           | 28.5±8.6     | 16-72 |
| Gender, female, n (%)                                                   | 1178 (39.9%) |       |
| Current Living Area, n (%)                                              |              |       |
| Extremely High Risk (≥2000 confirmed cases)                             | 106 (3.5%)   |       |
| High Risk (1000-1999 confirmed cases)                                   | 667 (22.2%)  |       |
| Moderate-High Risk (500-599 confirmed cases)                            | 770 (25.7%)  |       |
| Moderate Risk (100-499 confirmed cases)                                 | 1290 (43.0%) |       |
| Mild-Moderate Risk (<100 confirmed cases)                               | 167 (5.6%)   |       |
| Average length of implementation of mitigation measures, days (mean±SD) | 15±5.1       | 0-20  |
| <i>Compliance to Mitigation Measures</i>                                |              |       |
| Social Distancing, compliant, n (%)                                     | 2234 (75.6%) |       |
| Mask-Wearing, compliant, n (%)                                          | 2353 (79.6%) |       |
| Hand-Sanitising, compliant, n (%)                                       | 2257 (76.4%) |       |
| Daily Temperature-Taking, compliant, n (%)                              | 2350 (79.5%) |       |

### Overall behavioural compliance

Linear regression analysis was done to examine the indicators for total compliance with mitigation measures. Among all demographics and social indicators, age ( $\beta$ [95%CI]=0.06[0.003-0.012]) and regional risk-exposure ( $\beta$  [95%CI]=0.155[0.131-0.209]) were independently associated with an increased level of behavioural compliance (Table 2).

Table 2. Indicators of overall behavioural compliance levels

|                                      | Beta (95% CI)              |
|--------------------------------------|----------------------------|
| <b>Age</b>                           | <b>0.06 (0.003, 0.012)</b> |
| Gender (female)                      | -0.07 (-0.15, 0.01)        |
| <b>Regional Risk-exposure</b>        | <b>0.16 (0.13, 0.21)</b>   |
| Timeliness for Policy Implementation | 0.02 (-0.003, 0.01)        |

**Boldface indicates p<0.05**

### Compliance with individual protective measures

Compliance with social distancing was positively associated with compliance with hand-sanitising ( $\chi^2=4.21$ ,  $p=0.023$ ), but not with mask-wearing and temperature-taking ( $p=0.07$  and  $0.08$ , respectively). Compliance with mask-wearing was positively associated with

temperature-taking ( $\chi^2=493.11$ ,  $p<0.001$ ) and hand-sanitising ( $\chi^2=498.55$ ,  $p<0.001$ ). Compliance with temperature-taking was positively associated with hand-sanitising ( $\chi^2=802.16$ ,  $p<0.001$ ).

Logistic regression analysis was employed to investigate the predictors for compliance with each mitigation measure: social distancing, mask-wearing, temperature-taking and hand-sanitising.

Results showed that higher risk-exposure was positively associated with compliance with all measures except home quarantine. Advanced age was also borderline associated with higher compliance with all measures ( $p<0.05$ ) except home quarantine (inverse association). Interestingly, whilst the female gender was associated with higher compliance with home quarantine order, it was found inversely associated with mask-wearing and temperature-taking behaviours (Table 3).

Table 3. Indicators for compliance with respective mitigation measures

|                                      | Compliance vs. Non. Compliance<br>OR (95%CI) |
|--------------------------------------|----------------------------------------------|
| <i>Home Quarantine</i>               |                                              |
| <b>Gender, Female</b>                | <b>1.66 (1.38-1.97)</b>                      |
| Age                                  | 0.99 (0.98-0.999)*                           |
| Regional Risk-exposure               | 0.99 (0.90-1.08)                             |
| Timeliness for Policy Implementation | 1.003 (0.99-1.02)                            |
| <i>Mask-Wearing</i>                  |                                              |
| <b>Gender, Female</b>                | <b>0.56 (0.46-0.67)</b>                      |
| Age                                  | 1.03 (1.02-1.04)*                            |
| <b>Regional Risk-exposure</b>        | <b>1.41 (1.28-1.54)</b>                      |
| Timeliness for Policy Implementation | 0.99 (0.98-1.01)                             |
| <i>Temperature-taking</i>            |                                              |
| <b>Gender, Female</b>                | <b>0.79 (0.66-0.95)</b>                      |
| Age                                  | 1.005 (0.995-1.02)*                          |
| <b>Regional Risk-exposure</b>        | <b>1.40 (1.28-1.54)</b>                      |



|                                      |                         |
|--------------------------------------|-------------------------|
| Timeliness for Policy Implementation | 1.016 (0.998 -1.035)*   |
| <i>Hand-sanitising</i>               |                         |
| Gender, Female                       | 0.88 (0.74-1.05)        |
| Age                                  | 1.02 (1.01-1.04)*       |
| <b>Regional Risk-exposure</b>        | <b>1.39 (1.27-1.52)</b> |
| Timeliness for Policy Implementation | 1.01 (0.995-1.03)       |

**Boldface indicates significance,  $p < 0.0125$**

\*. *Trend to significance ( $0.0125 < p < 0.05$ )*

Gender-specific compliance with each personal protective measure is presented in Figure 1. Whilst males were less prone to be compliant with home quarantine order, they were more likely to abide by the other 3 personal protective measures.

Interestingly, the mid-age group (21-50) was the most non-compliant age group for social-distancing, nevertheless also the most compliant group for other protective behaviours (Figure 2). Further stratified analysis showed that, in the mid-age group, those aged 31-40 were the least compliant to the social distancing order (OR=4.17, 95% CI=3.07-5.66), four times as low to stay at home compared to the most compliant age group (<21 years of age). Yet they were the most compliant group for mask-wearing (OR=1.96, 95%CI=1.46-2.64), hand-sanitising (OR=2.24, 95% CI=1.70-2.96), and temperature-taking (OR=1.65, 95% CI=1.23-2.21). In addition, the 41-50 age group was found more compliant for mask-wearing (OR=1.88, 95% CI=1.24-2.87), whilst the 21-30 age group was found more compliant for hand-sanitising (OR=1.43, 95% CI=1.13-1.80), as compared to the younger adult group.

## DISCUSSION

To our knowledge, the present study is amongst the first to examine psychosocial indicators and correlates of the general public's compliance to personal protective measures during the COVID-19 outbreak in China. The main findings from the present study is that among all demographic and psychosocial factors, age and gender are the two main indicators for behavioural compliance to the protective measures.



1  
2  
3 Among all of the mitigation measures various countries have implemented during COVID-  
4 19, social distancing has been the most emphasised measure, and proven the most effective  
5 one.<sup>12</sup> China introduced the strict social distancing order in February when the epidemic was  
6 spreading at an alarming rate and causing an increasing number of deaths in the nation.<sup>5</sup> The  
7 execution of such an order was combined with home quarantine, the shutdown of all public  
8 places, including shops, malls, restaurants and entertainment venues, and forbidding of mass  
9 gatherings. With such a rigorous combination, the domestic and global spreading speed of  
10 the virus showed a significant slowdown from mid-February till mid-March.<sup>13</sup>  
11

12  
13  
14  
15  
16  
17 In the present study, males were found less likely to be compliant with the social-distancing  
18 order (72% vs. 74%), nevertheless more likely to follow other personal protective  
19 approaches, such as mask-wearing (83% vs. 74%), temperature-taking (81% vs. 77%), and  
20 hand-sanitising (77% vs. 75%). One plausible explanation for the gender difference in the  
21 behavioural compliance is that males, especially in the mid-age group, are identified to be the  
22 pillar of the family. Hence during a public health emergency like COVID-19, males are more  
23 expected to carry on with family errands and even go to work. In the present study, 87  
24 reported violation of the home quarantine order. Among whom, 60 went out for  
25 shopping/collection of essential goods (home supplies and grocery), with 67% of them being  
26 male. Apart from this, 24 reported to have left home for work purposes, among whom 67%  
27 were male. Our findings support previous literature that reported males were more likely to  
28 leave their homes during the early stages of the COVID-19 outbreak in the Hubei Province  
29 and other parts of China.<sup>8</sup> Interestingly, recent studies investigating behavioural compliance  
30 to safety measures (including mask-wearing, isolation) outside of China during COVID-19  
31 have mixed results.<sup>14-18</sup> Nonetheless, explanations for non-compliance to safety measures  
32 centres around the level of knowledge and perception of the COVID-19 pandemic. Similarly,  
33 past pandemic research have shown that females are more likely to adhere to more avoidant  
34 behaviours such as wearing masks.<sup>8-10</sup> Conversely, we found that males are more likely to  
35 comply with these avoidant behaviours apart from social distancing. Our findings may be  
36 explained by the male breadwinner model that still exists in China's social fabric today  
37 despite the increasingly blurred gender roles in modern-day China.<sup>20</sup> In relation to Confucian  
38 culture, the over 2000-year old model posits a gender role divide between males and females  
39 where males undertake an 'outside' role and are expected to provide for the family, while  
40 females take on the caregiving role ('inside' role) to tend to household matters.<sup>21-24</sup>  
41  
42  
43  
44  
45  
46  
47  
48  
49  
50  
51  
52  
53  
54  
55  
56  
57  
58  
59 Furthermore, a strong emphasis is placed on filial piety, where providing and caring for one's  
60

1  
2  
3 elderly parents is an esteemed and obligatory duty.<sup>25</sup> Qian and Qian<sup>22</sup> reported greater  
4 happiness in males when they are employed and providing for the family compared to  
5 females' employment status. Therefore, nonconformity to expectations of social roles  
6 particularly in the economic aspect may inevitably affect the health and welfare of both males  
7 and females. As a result, the conformity to role expectations in Chinese society may explain  
8 the non-compliance by males to social distancing measures as they are expected to continue  
9 providing and caring for the family, including their parents, even during a public health crisis.  
10 Additionally, gender only affected social distancing compliance in people above 21 years old,  
11 an age group where most working-class fall into, hence supporting our findings where more  
12 males reported leaving their homes for work purposes. Our study lends some support to  
13 Zhong and colleagues' findings that males were more likely to leave the house to go to  
14 crowded places during the outbreak in China,<sup>8</sup> but contradict in mask-wearing compliance.  
15 Higher likelihood of risk-taking behaviour in males was noted as an explanation for their  
16 non-compliance. On the contrary, we found that males were compliant to other preventive  
17 measures to mitigate risk. Notably, Zhong and colleagues gathered their data between  
18 January 27 and February 1 2020,<sup>8</sup> a week after the lockdown in China, three weeks earlier  
19 than when our data were collected. Therefore, strict restrictions and public health education  
20 by authorities during the three weeks may have been effective and enabled males to engage in  
21 more preventive measures even though they were still leaving home for work. Moreover, in a  
22 separate survey conducted as part of the large project, we found a higher percentage of men  
23 leaving the house for essential services, amongst which 53% reported moderate levels of  
24 anxiety, therefore demonstrating that levels of anxiety were high enough to encourage males  
25 to comply with other protective measures when they were out of the house or when they were  
26 not practising social distancing. Thus, all these coupled with the importance of filial piety and  
27 the male breadwinner role in Confucianism may explain why males were more non-  
28 compliant to social distancing orders during the outbreak.

29  
30  
31  
32  
33  
34  
35  
36  
37  
38  
39  
40  
41  
42  
43  
44  
45  
46  
47  
48  
49  
50  
51  
52  
53  
54  
55  
56  
57  
58  
59  
60  
Though gender played an important role in predicting compliance with home-quarantine in  
people aged 21 years old and above, it did not make a difference in people under 21 years  
old. Studies have shown that late adolescents tend not to comply with social distancing and  
stay home orders due to their likelihood in engaging in risky behaviors.<sup>8 26</sup> However, our  
study found that those aged between 16-21 were more likely to stay home, unlike people in  
the mid-age group, especially those between 31-40 years old. A possible explanation for the  
reduced social distancing and staying home compliance in the 31-40 age group is that a large

1  
2  
3 number of these people may belong to the working class and may have to leave the house for  
4 work. Previous literature on pandemics (e.g., SARS) have reported high levels of anxiety in  
5 populations worldwide with a correlation between higher levels of anxiety and greater  
6 compliance to public health measures such as social distancing.<sup>7</sup> Perceived social support  
7 might play a crucial role in moderating an individual's psychological resilience against such a  
8 crisis. Furthermore, greater perceived social support has shown to contribute to a greater  
9 sense of belongingness.<sup>27</sup> According to the belongingness hypothesis posited by Baumeister  
10 and Leary, a sense of belonging is a fundamental human need that ultimately motivates and  
11 drives human behavior.<sup>28</sup> Therefore, individuals who have greater perceived social support  
12 may be more likely to display greater social responsibility and comply with rules and  
13 recommendations set out to mitigate the COVID-19 outbreak, specifically through social  
14 distancing. This is because they may feel obligated to adhere to these rules to elicit a sense of  
15 affiliation and belonging as well as protect the vulnerable in their community in these times  
16 of uncertainty.

17  
18 The present study has several strengths and weaknesses. To our knowledge, the present study  
19 is amongst the first to examine the effect of demographical and social correlates on the  
20 compliance of public health mitigation measures, especially social distancing, during the  
21 COVID-19 outbreak. Furthermore, the study was conducted during the peak of the spread of  
22 COVID-19 in China and gathered nationwide data from participants in China. Therefore, the  
23 findings obtained are especially vital in understanding the motivations behind the lack of  
24 compliance with mitigation measures, particularly during the heightened period of the  
25 outbreak. We observed a difference in adherence to safety measures (e.g., mask-wearing) by  
26 males between two timeframes of the pandemic in China,<sup>8</sup> suggesting that public health  
27 education and strict restrictions may have impacted the public's perception and compliance.  
28 Hence, these results help further inform public health authorities and political leaders in the  
29 way they implement mitigation measures and administer financial and psychological aid to  
30 the community. Notably, the present study lacked important demographic factors such as  
31 education level and occupational status, which could have further informed future mitigation  
32 measures. Moreover, as the study was conducted through an online survey, the sample was  
33 limited to those with access to digital technology and Internet. Therefore, we were unable to  
34 determine if this subset of the population complied to mitigation measures as well as the  
35 factors associated with it. Information obtained from this subset is essential as they may be  
36 more vulnerable to the virus due to lack of access to extensive public health awareness and  
37  
38  
39  
40  
41  
42  
43  
44  
45  
46  
47  
48  
49  
50  
51  
52  
53  
54  
55  
56  
57  
58  
59  
60

1  
2  
3 mitigation measures online. While the lack of access to digital technology is a real limitation,  
4 future studies should attempt to reach out to this subset of the population. Retrospective  
5 studies could be conducted to assess their accordance with mitigation measures, specifically  
6 social distancing, and the role of psychosocial indicators and correlates on the compliance.  
7  
8 Additionally, it would be interesting to examine the anxiety levels of those in the under 21  
9 group that had a significant impact on their compliance with social distancing during the  
10 outbreak. Access to social media and overwhelming information provided by the media every  
11 day could be a factor that fuelled the heightened levels of anxiety.  
12  
13  
14  
15  
16

17 The non-compliance with public health mitigation measures, particularly home quarantine,  
18 was largely attributed to the male gender, and being in the middle-aged group. Our study  
19 found that while males in the mid-age group were least compliant with social distancing, they  
20 were most compliant to other measures (i.e., mask-wearing and temperature-taking), possibly  
21 due to the need to fulfil the role expectation of being the provider and breadwinner of the  
22 family. As the COVID-19 outbreak is still ongoing, public health authorities and  
23 governments could target this population in their future measures and aid that are provided  
24 during this pandemic.  
25  
26  
27  
28  
29  
30  
31  
32  
33  
34

### 35 **Figure Legends:**

36  
37 Figure 1. Gender-specific percentages for behavioural compliance

38  
39 Figure 2. Age-specific percentages for behavioural compliance  
40  
41  
42  
43

44 *Acknowledgements:* The authors would like to acknowledge all study participants for their  
45 cooperation.  
46  
47

48 *Contributors:* XX and YQ conceptualized and designed the study. XX drafted the  
49 manuscript. YQ supervised data analysis and interpretation of data. XX, WZ and XXH  
50 acquired the data. XX and KAC analyzed and interpreted the data. WZ and XXH revised the  
51 manuscript for intellectual content. YQ and KAC critically revised the manuscript for  
52 intellectual content.  
53  
54  
55  
56

57 *Disclaimer:* The funders had no role in study design, data analysis and interpretation, and  
58 writing of the manuscript.  
59  
60

1  
2  
3 *Funding:* This study is supported by the National Natural Science Foundation of China  
4 (71974170), Soft Science Project of Science Technology Department of Zhejiang Province of  
5 China (2019C35025) and Youth Project of the Center for Health Policy and Hospital  
6 Management of Zhejiang University (2019WSZ007).  
7  
8  
9

10 *Competing interests:* None declared.  
11  
12

13 *Patient consent for publication:* Not required.  
14

15 *Ethics approval:* This study has been approved by the Ethics Commission of Zhejiang  
16 University (ID: ZGL202005-01). Informed consent was obtained from participants prior to  
17 taking part in the study.  
18  
19

20 *Data availability statement:* Data are available upon request. Original data can be requested  
21 from the study team (xuxinsummer@zju.edu.cn).  
22  
23  
24  
25  
26  
27  
28  
29  
30  
31  
32  
33  
34  
35  
36  
37  
38  
39  
40  
41  
42  
43  
44  
45  
46  
47  
48  
49  
50  
51  
52  
53  
54  
55  
56  
57  
58  
59  
60

## REFERENCES

1. WHO-China Joint Mission. Report of the WHO-China Joint Mission on Coronavirus Disease 2019 (COVID-19): World Health Organization, 2020.
2. General Office of the People's Government of Hubei Province. Announcement of the People's Government of Hubei Province on Strengthening the Prevention and Control of Pneumonia Caused by New Coronavirus Infection. 2020a. Retrieved from [http://www.hubei.gov.cn/xxgk/gsgg/202001/t20200122\\_2013895.shtml](http://www.hubei.gov.cn/xxgk/gsgg/202001/t20200122_2013895.shtml)
3. World Health Organisation. Coronavirus disease (COVID-19) advice for the public. 2020
4. Zhang Y, Jiang B, Yuan J, et al. The impact of social distancing and epicenter lockdown on the COVID-19 epidemic in mainland China: A data-driven SEIQR model study. 2020 doi: 10.1101/2020.03.04.20031187
5. China Centre for Disease Control and Prevention. 新型冠状病毒肺炎 个人防护怎么做. China, 2020.
6. General Office of the People's Government of Hubei Province. Interim Measures for the Prevention and Control of Pneumonia Outbreak of Novel Coronavirus Infection in Wuhan. 2020b. Retrieved from [http://www.hubei.gov.cn/zhuanti/2020/gzxxgzbd/zxtb/202001/t20200130\\_2016578.shtml](http://www.hubei.gov.cn/zhuanti/2020/gzxxgzbd/zxtb/202001/t20200130_2016578.shtml)
7. Leung GM, Lam, T-H, Ho, L-M, Ho, S-Y, Chan, B H Y, Wong I O L, Hedley, A J. The impact of community psychological responses on outbreak control for severe acute respiratory syndrome in Hong Kong. *J Epidemiol Community Health* 2003;57(11):857-63. doi: 10.1136/jech.57.11.857
8. Zhong BL, Luo W, Li HM, et al. Knowledge, attitudes, and practices towards COVID-19 among Chinese residents during the rapid rise period of the COVID-19 outbreak: a quick online cross-sectional survey. *Int J Biol Sci* 2020;16(10):1745-52. doi: 10.7150/ijbs.45221 [published Online First: 2020/04/01]
9. Moran KR, Del Valle SY. A Meta-Analysis of the Association between Gender and Protective Behaviors in Response to Respiratory Epidemics and Pandemics. *PLoS One* 2016;11(10):e0164541. doi: 10.1371/journal.pone.0164541 [published Online First: 2016/10/22]

- 1  
2  
3 10. Bish AM, S. Demographic and attitudinal determinants of protective behaviours during a  
4 pandemic: A review. *British Journal of Health Psychology* 2010;15:797-824. doi:  
5  
6 10.1348/135910710X485826  
7  
8  
9 11. von Elm E, Altman, DG, Egger, M et al. The Strengthening the Reporting of  
10 Observational Studies in Epidemiology (STROBE) Statement: Guidelines for Reporting  
11 Observational Studies. *Epidemiology* 2007;18(6):800-04. doi:  
12  
13 10.1097/EDE.0b013e3181577654  
14  
15  
16 12. Kakodkar P, Kaka N, Baig MN. A Comprehensive Literature Review on the Clinical  
17 Presentation, and Management of the Pandemic Coronavirus Disease 2019 (COVID-19).  
18 *Cureus* 2020;12(4):e7560. doi: 10.7759/cureus.7560 [published Online First: 2020/04/10]  
19  
20  
21 13. Hao K. China's travel lockdown sharply slowed the global spread of Covid-19. *MIT*  
22 *Technology Review*, 2020.  
23  
24  
25 14. Afzal M, Khan, A, Qureshi, UUR, ..., Ahmed, H. Community-Based Assessment of  
26 Knowledge, Attitude, Practices and Risk Factors Regarding COVID-19 Among Pakistanis  
27 Residents During a Recent Outbreak: A Cross-Sectional Survey. *Journal of Community*  
28 *Health* 2020;13:1-11. doi: 10.1007/s10900-020-00875-z  
29  
30  
31 15. Meier K, Glatz, T, Guijt, MC, ..., COVID-19 Survey Study Group. Public perspectives on  
32 protective measures during the COVID-19 pandemic in the Netherlands, Germany and Italy:  
33 A survey study. *PLoS One* 2020;15:1-17. doi: 10.1371/journal.pone.0236917  
34  
35  
36 16. Mansuri F, Zalat, MM, Khan, AA, Alsaedi, EQ & Ibrahim, HM. Estimating the public  
37 response to mitigation measures and selfperceived behaviours towards the COVID-19  
38 pandemic. *Journal of Taibah University Medical Sciences* 2020;July 4:1-6. doi:  
39 10.1016/j.jtumed.2020.06.003  
40  
41  
42 17. de Bruine WB, D. Relationships Between Initial COVID-19 Risk Perceptions and  
43 Protective Health Behaviors: A National Survey. *American Journal of Preventive Medicine*  
44 2020;59(2):157-67. doi: 10.1016/j.amepre.2020.05.001  
45  
46  
47 18. Honarvar B, Lankarani, KB, Kharmandar, A, ..., Zare, M. Knowledge, attitudes, risk  
48 perceptions, and practices of adults toward COVID-19: a population and field-based study  
49 from Iran. *International Journal of Public Health* 2020;Jun 24:1-9. doi: 10.1007/s00038-020-  
50 01406-2  
51  
52  
53  
54  
55  
56  
57  
58  
59  
60



19. de la Vega R, Barquin, R. R., Boros, S., & Szabo, A. Could Attitudes Toward COVID-19 in Spain Render Men More Vulnerable Than Women? 2020, April 2 doi: 10.31234/osf.io/dyxqn.
20. Attane' I. Being a Woman in China Today: A Demography of Gender. *China Perspectives* 2012;4:5-15.
21. Lebra TS. Confucian gender role and personal fulfillment for Japanese women. Albany, NY: State University of New York Press. 1998:209–227.
22. Qian Y, Qian Z. Work, Family, and Gendered Happiness Among Married People in Urban China. *Social Indicators Research* 2014;121(1):61-74. doi: 10.1007/s11205-014-0623-9
23. Zuo J. From Revolutionary Comrades to Gendered Partners: Marital Construction of Breadwinning in Post-Mao Urban China. *Journal of Family Issues* 2003;24:314-37. doi: 10.1177/0192513X02250888
24. W-M T. Confucius and Confucianism. In: Vos WHSGAD, ed. *Confucianism and the Family*. Albany, New York: State University of New York Press 1998:3-36.
25. Stafford C. *The roads of Chinese childhood: Learning and Identification in Angang*. Cambridge, UK: Cambridge University Press 1995.
26. Duell N, Steinberg, L, Icenogle, G, ..., Chang, L. Age Patterns in Risk Taking Across the World. *J Youth Adolescence* 2018;47:1052–72. doi: 10.1007/s10964-017-0752-y
27. Hagerty BM, Williams, R. A., Coyne, J. C., Early, M. R. Sense of belonging and indicators of social and psychological functioning. *Archives of Psychiatric Nursing* 1996;10:235-44. doi: 10.1016/S0883-9417(96)80029-X
28. Baumeister RL, MR. The Need to Belong: Desire for Interpersonal Attachments as a Fundamental Human Motivation. *Psychological Bulletin* 1995;117(3):497-529.



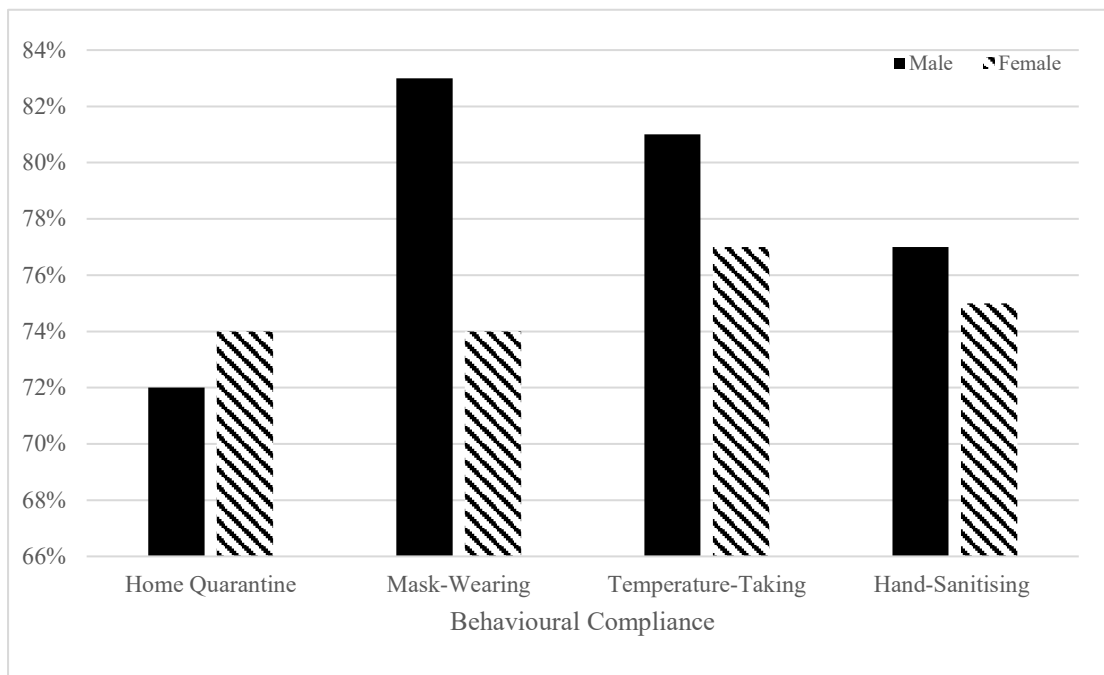

Figure 1. Gender-specific percentages for behavioural compliance

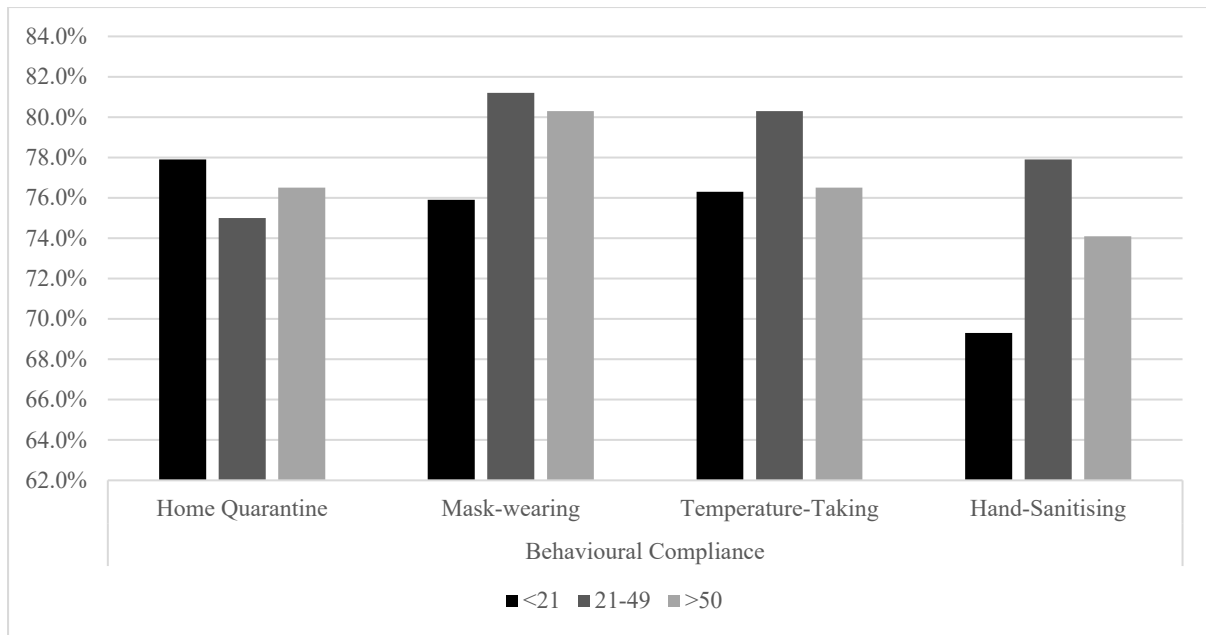

Figure 2. Age-specific percentages for behavioural compliance

# Reporting checklist for cross sectional study.

Based on the STROBE cross sectional guidelines.

## Instructions to authors

Complete this checklist by entering the page numbers from your manuscript where readers will find each of the items listed below.

Your article may not currently address all the items on the checklist. Please modify your text to include the missing information. If you are certain that an item does not apply, please write "n/a" and provide a short explanation.

Upload your completed checklist as an extra file when you submit to a journal.

In your methods section, say that you used the STROBE cross sectional reporting guidelines, and cite them as:

von Elm E, Altman DG, Egger M, Pocock SJ, Gotsche PC, Vandembroucke JP. The Strengthening the Reporting of Observational Studies in Epidemiology (STROBE) Statement: guidelines for reporting observational studies.

|                           |                                                                                                        | Page   |
|---------------------------|--------------------------------------------------------------------------------------------------------|--------|
|                           | Reporting Item                                                                                         | Number |
| <b>Title and abstract</b> |                                                                                                        |        |
| Title                     | <a href="#">#1a</a> Indicate the study's design with a commonly used term in the title or the abstract | 1      |

|    |                      |                     |                                                                 |     |
|----|----------------------|---------------------|-----------------------------------------------------------------|-----|
| 1  | Abstract             | <a href="#">#1b</a> | Provide in the abstract an informative and balanced summary     | 2   |
| 2  |                      |                     | of what was done and what was found                             |     |
| 3  |                      |                     |                                                                 |     |
| 4  |                      |                     |                                                                 |     |
| 5  |                      |                     |                                                                 |     |
| 6  | <b>Introduction</b>  |                     |                                                                 |     |
| 7  |                      |                     |                                                                 |     |
| 8  |                      |                     |                                                                 |     |
| 9  |                      |                     |                                                                 |     |
| 10 | Background /         | <a href="#">#2</a>  | Explain the scientific background and rationale for the         | 3   |
| 11 | rationale            |                     | investigation being reported                                    |     |
| 12 |                      |                     |                                                                 |     |
| 13 |                      |                     |                                                                 |     |
| 14 |                      |                     |                                                                 |     |
| 15 | Objectives           | <a href="#">#3</a>  | State specific objectives, including any prespecified           | 3   |
| 16 |                      |                     | hypotheses                                                      |     |
| 17 |                      |                     |                                                                 |     |
| 18 |                      |                     |                                                                 |     |
| 19 |                      |                     |                                                                 |     |
| 20 | <b>Methods</b>       |                     |                                                                 |     |
| 21 |                      |                     |                                                                 |     |
| 22 |                      |                     |                                                                 |     |
| 23 | Study design         | <a href="#">#4</a>  | Present key elements of study design early in the paper         | 4   |
| 24 |                      |                     |                                                                 |     |
| 25 |                      |                     |                                                                 |     |
| 26 | Setting              | <a href="#">#5</a>  | Describe the setting, locations, and relevant dates, including  | 4   |
| 27 |                      |                     | periods of recruitment, exposure, follow-up, and data           |     |
| 28 |                      |                     | collection                                                      |     |
| 29 |                      |                     |                                                                 |     |
| 30 |                      |                     |                                                                 |     |
| 31 |                      |                     |                                                                 |     |
| 32 |                      |                     |                                                                 |     |
| 33 |                      |                     |                                                                 |     |
| 34 | Eligibility criteria | <a href="#">#6a</a> | Give the eligibility criteria, and the sources and methods of   | 4   |
| 35 |                      |                     | selection of participants.                                      |     |
| 36 |                      |                     |                                                                 |     |
| 37 |                      |                     |                                                                 |     |
| 38 |                      |                     |                                                                 |     |
| 39 |                      |                     |                                                                 |     |
| 40 |                      | <a href="#">#7</a>  | Clearly define all outcomes, exposures, predictors, potential   | n/a |
| 41 |                      |                     | confounders, and effect modifiers. Give diagnostic criteria, if |     |
| 42 |                      |                     | applicable                                                      |     |
| 43 |                      |                     |                                                                 |     |
| 44 |                      |                     |                                                                 |     |
| 45 |                      |                     |                                                                 |     |
| 46 |                      |                     |                                                                 |     |
| 47 | Data sources /       | <a href="#">#8</a>  | For each variable of interest give sources of data and details  | 4   |
| 48 | measurement          |                     | of methods of assessment (measurement). Describe                |     |
| 49 |                      |                     | comparability of assessment methods if there is more than       |     |
| 50 |                      |                     | one group. Give information separately for for exposed and      |     |
| 51 |                      |                     | unexposed groups if applicable.                                 |     |
| 52 |                      |                     |                                                                 |     |
| 53 |                      |                     |                                                                 |     |
| 54 |                      |                     |                                                                 |     |
| 55 |                      |                     |                                                                 |     |
| 56 |                      |                     |                                                                 |     |
| 57 |                      |                     |                                                                 |     |
| 58 |                      |                     |                                                                 |     |
| 59 |                      |                     |                                                                 |     |
| 60 |                      |                     |                                                                 |     |

|    |                |                      |                                                               |     |
|----|----------------|----------------------|---------------------------------------------------------------|-----|
| 1  | Bias           | <a href="#">#9</a>   | Describe any efforts to address potential sources of bias     | 4   |
| 2  |                |                      |                                                               |     |
| 3  |                |                      |                                                               |     |
| 4  | Study size     | <a href="#">#10</a>  | Explain how the study size was arrived at                     | 5   |
| 5  |                |                      |                                                               |     |
| 6  |                |                      |                                                               |     |
| 7  | Quantitative   | <a href="#">#11</a>  | Explain how quantitative variables were handled in the        | 5   |
| 8  | variables      |                      | analyses. If applicable, describe which groupings were        |     |
| 9  |                |                      | chosen, and why                                               |     |
| 10 |                |                      |                                                               |     |
| 11 |                |                      |                                                               |     |
| 12 |                |                      |                                                               |     |
| 13 |                |                      |                                                               |     |
| 14 |                |                      |                                                               |     |
| 15 | Statistical    | <a href="#">#12a</a> | Describe all statistical methods, including those used to     | 4   |
| 16 | methods        |                      | control for confounding                                       |     |
| 17 |                |                      |                                                               |     |
| 18 |                |                      |                                                               |     |
| 19 |                |                      |                                                               |     |
| 20 | Statistical    | <a href="#">#12b</a> | Describe any methods used to examine subgroups and            | 5   |
| 21 | methods        |                      | interactions                                                  |     |
| 22 |                |                      |                                                               |     |
| 23 |                |                      |                                                               |     |
| 24 |                |                      |                                                               |     |
| 25 |                |                      |                                                               |     |
| 26 | Statistical    | <a href="#">#12c</a> | Explain how missing data were addressed                       | 5   |
| 27 | methods        |                      |                                                               |     |
| 28 |                |                      |                                                               |     |
| 29 |                |                      |                                                               |     |
| 30 |                |                      |                                                               |     |
| 31 | Statistical    | <a href="#">#12d</a> | If applicable, describe analytical methods taking account of  | n/a |
| 32 | methods        |                      | sampling strategy                                             |     |
| 33 |                |                      |                                                               |     |
| 34 |                |                      |                                                               |     |
| 35 |                |                      |                                                               |     |
| 36 | Statistical    | <a href="#">#12e</a> | Describe any sensitivity analyses                             | n/a |
| 37 | methods        |                      |                                                               |     |
| 38 |                |                      |                                                               |     |
| 39 |                |                      |                                                               |     |
| 40 |                |                      |                                                               |     |
| 41 |                |                      |                                                               |     |
| 42 | <b>Results</b> |                      |                                                               |     |
| 43 |                |                      |                                                               |     |
| 44 |                |                      |                                                               |     |
| 45 | Participants   | <a href="#">#13a</a> | Report numbers of individuals at each stage of study—eg       | 5   |
| 46 |                |                      | numbers potentially eligible, examined for eligibility,       |     |
| 47 |                |                      | confirmed eligible, included in the study, completing follow- |     |
| 48 |                |                      | up, and analysed. Give information separately for for         |     |
| 49 |                |                      | exposed and unexposed groups if applicable.                   |     |
| 50 |                |                      |                                                               |     |
| 51 |                |                      |                                                               |     |
| 52 |                |                      |                                                               |     |
| 53 |                |                      |                                                               |     |
| 54 |                |                      |                                                               |     |
| 55 |                |                      |                                                               |     |
| 56 |                |                      |                                                               |     |
| 57 | Participants   | <a href="#">#13b</a> | Give reasons for non-participation at each stage              | 5   |
| 58 |                |                      |                                                               |     |
| 59 |                |                      |                                                               |     |
| 60 |                |                      |                                                               |     |

|    |                   |                      |                                                                   |     |
|----|-------------------|----------------------|-------------------------------------------------------------------|-----|
| 1  | Participants      | <a href="#">#13c</a> | Consider use of a flow diagram                                    | n/a |
| 2  |                   |                      |                                                                   |     |
| 3  |                   |                      |                                                                   |     |
| 4  | Descriptive data  | <a href="#">#14a</a> | Give characteristics of study participants (eg demographic,       | 5   |
| 5  |                   |                      | clinical, social) and information on exposures and potential      |     |
| 6  |                   |                      | confounders. Give information separately for exposed and          |     |
| 7  |                   |                      | unexposed groups if applicable.                                   |     |
| 8  |                   |                      |                                                                   |     |
| 9  |                   |                      |                                                                   |     |
| 10 |                   |                      |                                                                   |     |
| 11 |                   |                      |                                                                   |     |
| 12 |                   |                      |                                                                   |     |
| 13 |                   |                      |                                                                   |     |
| 14 | Descriptive data  | <a href="#">#14b</a> | Indicate number of participants with missing data for each        | 5   |
| 15 |                   |                      | variable of interest                                              |     |
| 16 |                   |                      |                                                                   |     |
| 17 |                   |                      |                                                                   |     |
| 18 |                   |                      |                                                                   |     |
| 19 | Outcome data      | <a href="#">#15</a>  | Report numbers of outcome events or summary measures.             | 4   |
| 20 |                   |                      | Give information separately for exposed and unexposed             |     |
| 21 |                   |                      | groups if applicable.                                             |     |
| 22 |                   |                      |                                                                   |     |
| 23 |                   |                      |                                                                   |     |
| 24 |                   |                      |                                                                   |     |
| 25 |                   |                      |                                                                   |     |
| 26 |                   |                      |                                                                   |     |
| 27 | Main results      | <a href="#">#16a</a> | Give unadjusted estimates and, if applicable, confounder-         | 6   |
| 28 |                   |                      | adjusted estimates and their precision (eg, 95% confidence        |     |
| 29 |                   |                      | interval). Make clear which confounders were adjusted for         |     |
| 30 |                   |                      | and why they were included                                        |     |
| 31 |                   |                      |                                                                   |     |
| 32 |                   |                      |                                                                   |     |
| 33 |                   |                      |                                                                   |     |
| 34 |                   |                      |                                                                   |     |
| 35 |                   |                      |                                                                   |     |
| 36 |                   |                      |                                                                   |     |
| 37 | Main results      | <a href="#">#16b</a> | Report category boundaries when continuous variables were         | 6   |
| 38 |                   |                      | categorized                                                       |     |
| 39 |                   |                      |                                                                   |     |
| 40 |                   |                      |                                                                   |     |
| 41 |                   |                      |                                                                   |     |
| 42 | Main results      | <a href="#">#16c</a> | If relevant, consider translating estimates of relative risk into | n/a |
| 43 |                   |                      | absolute risk for a meaningful time period                        |     |
| 44 |                   |                      |                                                                   |     |
| 45 |                   |                      |                                                                   |     |
| 46 |                   |                      |                                                                   |     |
| 47 |                   |                      |                                                                   |     |
| 48 | Other analyses    | <a href="#">#17</a>  | Report other analyses done—e.g., analyses of subgroups            | 6   |
| 49 |                   |                      | and interactions, and sensitivity analyses                        |     |
| 50 |                   |                      |                                                                   |     |
| 51 |                   |                      |                                                                   |     |
| 52 |                   |                      |                                                                   |     |
| 53 | <b>Discussion</b> |                      |                                                                   |     |
| 54 |                   |                      |                                                                   |     |
| 55 |                   |                      |                                                                   |     |
| 56 | Key results       | <a href="#">#18</a>  | Summarise key results with reference to study objectives          | 7   |
| 57 |                   |                      |                                                                   |     |
| 58 |                   |                      |                                                                   |     |
| 59 |                   |                      |                                                                   |     |
| 60 |                   |                      |                                                                   |     |

|    |                          |                     |                                                                |     |
|----|--------------------------|---------------------|----------------------------------------------------------------|-----|
| 1  | Limitations              | <a href="#">#19</a> | Discuss limitations of the study, taking into account sources  | 9   |
| 2  |                          |                     | of potential bias or imprecision. Discuss both direction and   |     |
| 3  |                          |                     | magnitude of any potential bias.                               |     |
| 4  |                          |                     |                                                                |     |
| 5  |                          |                     |                                                                |     |
| 6  |                          |                     |                                                                |     |
| 7  |                          |                     |                                                                |     |
| 8  |                          |                     |                                                                |     |
| 9  | Interpretation           | <a href="#">#20</a> | Give a cautious overall interpretation considering objectives, | 7-9 |
| 10 |                          |                     | limitations, multiplicity of analyses, results from similar    |     |
| 11 |                          |                     | studies, and other relevant evidence.                          |     |
| 12 |                          |                     |                                                                |     |
| 13 |                          |                     |                                                                |     |
| 14 |                          |                     |                                                                |     |
| 15 |                          |                     |                                                                |     |
| 16 | Generalisability         | <a href="#">#21</a> | Discuss the generalisability (external validity) of the study  | 9   |
| 17 |                          |                     | results.                                                       |     |
| 18 |                          |                     |                                                                |     |
| 19 |                          |                     |                                                                |     |
| 20 |                          |                     |                                                                |     |
| 21 |                          |                     |                                                                |     |
| 22 | <b>Other Information</b> |                     |                                                                |     |
| 23 |                          |                     |                                                                |     |
| 24 |                          |                     |                                                                |     |
| 25 | Funding                  | <a href="#">#22</a> | Give the source of funding and the role of the funders for the | 10  |
| 26 |                          |                     | present study and, if applicable, for the original study on    |     |
| 27 |                          |                     | which the present article is based                             |     |
| 28 |                          |                     |                                                                |     |
| 29 |                          |                     |                                                                |     |
| 30 |                          |                     |                                                                |     |
| 31 |                          |                     |                                                                |     |
| 32 |                          |                     |                                                                |     |

33 None The STROBE checklist is distributed under the terms of the Creative Commons Attribution  
34 License CC-BY. This checklist can be completed online using <https://www.goodreports.org/>, a tool  
35 made by the [EQUATOR Network](#) in collaboration with [Penelope.ai](#)  
36  
37  
38  
39  
40  
41  
42  
43  
44  
45  
46  
47  
48  
49  
50  
51  
52  
53  
54  
55  
56  
57  
58  
59  
60

# BMJ Open

## Demographic and Social Correlates and Indicators for Behavioural Compliance with Personal Protection Among Chinese Community-Dwellers During COVID-19: A Cross-sectional Study

|                                 |                                                                                                                                                                                                                                                                                                                                                                                                                                                                                                                                               |
|---------------------------------|-----------------------------------------------------------------------------------------------------------------------------------------------------------------------------------------------------------------------------------------------------------------------------------------------------------------------------------------------------------------------------------------------------------------------------------------------------------------------------------------------------------------------------------------------|
| Journal:                        | <i>BMJ Open</i>                                                                                                                                                                                                                                                                                                                                                                                                                                                                                                                               |
| Manuscript ID                   | bmjopen-2020-041453.R2                                                                                                                                                                                                                                                                                                                                                                                                                                                                                                                        |
| Article Type:                   | Original research                                                                                                                                                                                                                                                                                                                                                                                                                                                                                                                             |
| Date Submitted by the Author:   | 29-Oct-2020                                                                                                                                                                                                                                                                                                                                                                                                                                                                                                                                   |
| Complete List of Authors:       | Xu, Xin; Zhejiang University School of Public Health; National University Singapore Yong Loo Lin School of Medicine<br>Chew, Kimberly; National University Singapore Yong Loo Lin School of Medicine<br>Xu, Xiaolin; Zhejiang University School of Public Health<br>Wu, Zhihua; Zhejiang University School of Public Health<br>Xiao, Xiaohua; Zhejiang University School of Public Health<br>Yang, Qian; Zhejiang University School of Public Health; Zhejiang University School of Medicine Children's Hospital, Department of Endocrinology |
| <b>Primary Subject Heading</b>: | Public health                                                                                                                                                                                                                                                                                                                                                                                                                                                                                                                                 |
| Secondary Subject Heading:      | Infectious diseases, Global health                                                                                                                                                                                                                                                                                                                                                                                                                                                                                                            |
| Keywords:                       | Public health < INFECTIOUS DISEASES, Demography < TROPICAL MEDICINE, EPIDEMIOLOGY                                                                                                                                                                                                                                                                                                                                                                                                                                                             |
|                                 |                                                                                                                                                                                                                                                                                                                                                                                                                                                                                                                                               |

SCHOLARONE™  
Manuscripts





I, the Submitting Author has the right to grant and does grant on behalf of all authors of the Work (as defined in the below author licence), an exclusive licence and/or a non-exclusive licence for contributions from authors who are: i) UK Crown employees; ii) where BMJ has agreed a CC-BY licence shall apply, and/or iii) in accordance with the terms applicable for US Federal Government officers or employees acting as part of their official duties; on a worldwide, perpetual, irrevocable, royalty-free basis to BMJ Publishing Group Ltd ("BMJ") its licensees and where the relevant Journal is co-owned by BMJ to the co-owners of the Journal, to publish the Work in this journal and any other BMJ products and to exploit all rights, as set out in our [licence](#).

The Submitting Author accepts and understands that any supply made under these terms is made by BMJ to the Submitting Author unless you are acting as an employee on behalf of your employer or a postgraduate student of an affiliated institution which is paying any applicable article publishing charge ("APC") for Open Access articles. Where the Submitting Author wishes to make the Work available on an Open Access basis (and intends to pay the relevant APC), the terms of reuse of such Open Access shall be governed by a Creative Commons licence – details of these licences and which [Creative Commons](#) licence will apply to this Work are set out in our licence referred to above.

Other than as permitted in any relevant BMJ Author's Self Archiving Policies, I confirm this Work has not been accepted for publication elsewhere, is not being considered for publication elsewhere and does not duplicate material already published. I confirm all authors consent to publication of this Work and authorise the granting of this licence.

1  
2  
3 Demographic and Social Correlates and Indicators for Behavioural Compliance with Personal  
4 Protection Among Chinese Community-Dwellers During COVID-19: A Cross-sectional  
5  
6  
7 Study

8 **Xu Xin<sup>1,2</sup>, PhD, Kimberly Ann Chew<sup>2</sup>, BA (Hons), Xu Xiaolin (PhD)<sup>1</sup>, Wu Zhihua<sup>1</sup>, BA,**  
9 **Xiao Xiaohua<sup>1</sup>, BA, Yang Qian<sup>1,3\*</sup>, PhD**

10  
11 *<sup>1</sup>School of Public Health & the 2<sup>nd</sup> Affiliated Hospital of School of Medicine, Zhejiang*  
12 *University, China*

13  
14 *<sup>2</sup>Yong Loo Lin School of Medicine, National University of Singapore, Singapore*

15  
16 *<sup>3</sup>Department of Endocrinology, the Children's Hospital, Zhejiang University School of*  
17 *Medicine, National Clinical Research Center for Child Health*

18  
19  
20 Corresponding author:

21  
22 Dr. Qian Yang

23  
24 1011 Administrative Building, Zijingang Campus, Zhejiang University, Hangzhou, China,  
25 310058, chianyoung@zju.edu.cn

26  
27 Abstract word count: 244 words

28  
29 Word count: 2990 words

30  
31 Number of figures & tables: 5

32  
33 Key words: COVID-19 coronavirus, behavioural compliance, social distancing, personal  
34 protective measures

## ABSTRACT

### *Objectives:*

Examine compliance with personal protective measures in communities for the prevention and control of local transmission of the coronavirus (COVID-19), and explore indicators for such behavioural compliance.

### *Design:*

Cross-sectional design with a self-selecting sample. Data collected in February 2020.

### *Setting:*

Community dwellers in China.

### *Participants:*

2956 participants aged 16 and above completed the study and were included in the analysis.

### *Outcome measures:*

Nationwide COVID-19 survey. Demographics and self-reported compliance with four individual major personal protective measures—home quarantine, mask-wearing, temperature-taking and hand-sanitising were collected and recorded. Outbreak severity and timeliness of personal protection order were obtained from the China Centre Disease Control (China CDC) website. Logistic regression models were employed to examine the association between demographic and social indicators and personal behavioural compliance.

### *Results:*

Compliance with home quarantine was only associated with gender (male, OR=0.61[0.51-0.73], inverse association) but no other indicators. In contrast, male had higher compliance with mask-wearing (OR=1.79[1.49-2.16]) and temperature taking (OR=1.27[1.05-1.53]). Compared to younger adults ( $\leq 20$  years), the middle-age groups (31-40 and 41-50 years of age) were more compliant with all protective behaviours, except for home quarantine (OR=0.71[0.54-0.93] and 0.67[0.46-0.97], respectively).

### *Conclusion:*

Male gender was associated with lower compliance with home quarantine yet higher compliance with mask-wearing and temperature-taking. The middle-age participants (31-50 years of age) had lower compliance with home quarantine order but higher with other measures. In light of the ongoing COVID-19 pandemic, public health authorities should tailor policy implementation to disparities in demographic and social indicators.

### Strengths and limitations of this study

- Extensive data collected during the peak of the COVID-19 outbreak in China ( $n_{\text{completed}} = 2956$ ).
- Data was collected from multiple provinces with various levels of risk exposure to avoid bias in the sample (categorised using the number of confirmed cases reported by China CDC).
- The effect of other demographical variables (e.g., education, occupational status) was limited due to the lack of data.
- Survey was available online only, hence sample was limited to those with access to digital technology and Internet.
- More mental health-related questionnaires (e.g., depression, anxiety) should be collected and analysed as potential indicators for behavioural compliance.

### INTRODUCTION

In light of the coronavirus disease 2019 (COVID-19) outbreak that started in December 2019, the Chinese Government has taken a number of strict mitigation strategies to expedite the tracking, testing and treatment of COVID-19. To prevent and control the transmission of the virus in local communities, the aggressive social distancing order has been enforced nationwide in China as early as from January 25, 2020. Notably, prevention and control measures have been implemented in three phases: 1) suspension of intra-city and intercity transportation, and strict control of importation and exportation of COVID-19 cases from Wuhan and other provinces, 2) delaying the severity and rise in cases through several safety measures, 3) decreasing clusters, using standardised protocols and execution of “scientific evidence-based policy”. Examples of such measures include the closure of wet markets, contact tracing, temperature-taking, health declarations, quarantine, disallowing large gatherings, and implementation of strict travel restrictions.<sup>1 2</sup> Through strict compliance of Chinese citizens to the order, social distancing has been proven the most effective measure to ease the rapid spreading of the virus.<sup>3 4</sup>

Among all prevention and control measures, a nationwide movement restriction order was announced by the Chinese government soon after the lockdown of Wuhan city on January 23, 2020. This social distancing order was introduced and enforced subsequently, requiring all citizens to remain at home and avoid most forms of face-to-face social contact when outside. The order was implemented with the recommendation of other personal protective

1  
2  
3 measurements, such as regular hand sanitising, daily temperature-taking, and mask-wearing.<sup>5</sup>  
4  
5 The implementation of the personal protection order was challenging. Social distancing means  
6 staying away from mass gatherings and keeping a distance of 6 feet or 2 meters.<sup>3</sup> Due to the  
7 Chinese New Year celebration, which took place around the same time (January 25, 2020)  
8 when the outbreak happened, movements among cities and suburban areas, as well as family  
9 gatherings were inevitable and difficult to contain. Voluntary behavioural intervention during  
10 an infectious disease outbreak, such as social distancing, requires not only sufficient realisation  
11 of the situation severity, but more importantly, determined commitment to such action from  
12 individuals in the community.  
13  
14  
15  
16  
17  
18  
19

20 Hence prior to the enforcement of the nationwide home quarantine order, the Chinese  
21 government announced a series of precautionary regulations, including 1) refusal of entry into  
22 public places without wearing a mask and obtaining a normal body temperature; 2) set-up of a  
23 detailed individual purchase record of fever/cough/flu-related medications in local pharmacies;  
24 3) screening and a detailed registry of suspected cases with high fever in the community. The  
25 entire enforcement was accompanied by thorough public health education and promotion  
26 which started as early as late January. Violation of the above-mentioned regulations could  
27 result in further investigation or even legal liability.<sup>6</sup>  
28  
29  
30  
31  
32  
33  
34  
35

36 After the implementation of the four personal protective behaviours, including home  
37 quarantine, mask-wearing, temperature-taking, and hand-sanitising, non-compliance would  
38 lead to strict education and immediate correction from various levels of management, ranging  
39 from the street and community, to district and city levels of local authority.  
40  
41  
42  
43  
44

45 The implementation of these personal protective behaviours is necessary. However,  
46 compliance to these actions is not only determined by the severity of the disease, but also a  
47 number of demographic (e.g., gender, age) and social factors.<sup>7 8</sup> Interestingly, while previous  
48 literature have demonstrated that older people and females are typically more likely to practice  
49 protective behaviours in public health emergencies such as the severe acute respiratory  
50 syndrome (SARS) and H1N1 swine flu, the results are mixed.<sup>9 10</sup> Hence in the present study,  
51 we sought to understand the demographic indicators and correlates of individuals' compliance  
52 to preventive measures during COVID-19.  
53  
54  
55  
56  
57  
58  
59  
60

## METHODS

## Study design and sampling

With a cross-sectional study design, a nationwide online survey on behavioural compliance during COVID-19 was carried out during February 14-17, 2020, among Chinese citizens in China. Community dwellers aged 16 and above were enrolled in the survey. To avoid bias in the sample, the study team disseminated the survey questionnaire nationwide in all 31 provinces and regions in China with different levels of risk exposure. Study description and questionnaires were posted through various social media platforms, such as Wechat and Weibo, with a notice and invitation on these platforms for better visibility. All participants from this self-selecting sample provided electronic informed consent prior to taking the survey (Supplemental Material). The study protocol was approved by the Ethics Commission of Zhejiang University prior to the commencement of the study and was in accordance with the Declaration of Helsinki. STROBE cross-sectional reporting guidelines were used.<sup>11</sup>

## Questionnaires

De-identified demographic information (age, gender, current living area) was collected.

*Outbreak Severity:* Severity of the outbreak in each province and region in all survey areas were sorted into 5 categories according to the confirmed coronavirus cases published on the China Center for Disease Control and Prevention (CDC) website on the day of the survey (February 14, 2020): <100 cases, 100-499 cases, 500-999 cases, 1000-1999 cases, >2000 cases.

*Policy Timeliness:* Timeliness of the social distancing order implemented by the provincial government was assessed by the length (in days) between the implementation date of the social distancing order to the date of the survey. For those areas where the order was implemented after the survey, the score "0" was granted, e.g. Nei Meng province. Scores were subsequently transformed into fractional rank for analysis purposes.

## Compliance to Mitigation Measures

An individual's compliance with a number of mitigation measures introduced by the local government was defined as:

1. home quarantine, as defined by leaving residential address for  $\leq 1$  in 3 days' time, as per the Chinese government's regulation;
2. mask-wearing, as defined by wearing a mask when leaving the residential address, as per the Chinese government's regulation;
3. daily temperature-taking, as defined by taking one's own temperature at least once every day per the Chinese government's regulation;
4. daily hand-sanitising, as defined by sanitising one's hands with a sanitiser with >75% alcohol per the Chinese government's regulation.

Overall compliance is defined as the sum of compliance score on 4 protective behaviours, rated at 0 (none), 1 (compliant with 1 behaviour), 2 (compliant with 2 behaviours), 3 (compliant with 3 behaviours), and 4 (compliant with all 4 behaviours).

### Statistical Analysis

Associations among 4 individual protective behaviours were examined using Chi-square. Logistic regression models were applied to investigate the indicators for accordance with each individual mitigation measure. All analyses were performed using SPSS version 25 and SAS version 9.4. Statistical significance was determined as two-tailed p-value < 0.05. Bonferroni correction was employed to obtain an adjusted significance level for each protective behaviour:  $\approx 0.05/4=0.0125$ .

### Patient and Public Involvement

No patients and none of the public were involved in the study planning, design and interpretation of results. Results from the paper will be disseminated to the general public through online article format.

## RESULTS

A total of 3,000 participants completed the survey, among whom, 7 had incomplete data and 37 had repeated answers and were removed from the dataset, leaving a total of 2,956 in the current analysis. All 2,956 subjects completed all questionnaires in the survey. Sample descriptives are in Table 1.

Table 1. Study sample descriptives

|                                                                         | Whole Sample | Range |
|-------------------------------------------------------------------------|--------------|-------|
| <i>Demographics</i>                                                     |              |       |
| Age (mean±SD)                                                           | 28.5±8.6     | 16-72 |
| Gender, female, n (%)                                                   | 1178 (39.9%) |       |
| Current Living Area, n (%)                                              |              |       |
| Extremely High Risk (≥2000 confirmed cases)                             | 106 (3.5%)   |       |
| High Risk (1000-1999 confirmed cases)                                   | 667 (22.2%)  |       |
| Moderate-High Risk (500-599 confirmed cases)                            | 770 (25.7%)  |       |
| Moderate Risk (100-499 confirmed cases)                                 | 1290 (43.0%) |       |
| Mild-Moderate Risk (<100 confirmed cases)                               | 167 (5.6%)   |       |
| Average length of implementation of mitigation measures, days (mean±SD) | 15±5.1       | 0-20  |
| <i>Compliance to Mitigation Measures</i>                                |              |       |



|                                      |              |
|--------------------------------------|--------------|
| Home Quarantine, compliant, n (%)    | 2234 (75.6%) |
| Mask-wearing, compliant, n (%)       | 2353 (79.6%) |
| Temperature-taking, compliant, n (%) | 2350 (79.5%) |
| Hand-sanitising, compliant, n (%)    | 2257 (76.4%) |

### Compliance with individual protective measures

Compliance with home quarantine was positively associated with compliance with hand-sanitising ( $\chi^2=4.21$ ,  $p=0.023$ ), but not with mask-wearing and temperature-taking ( $p=0.07$  and  $0.08$ , respectively). Compliance with mask-wearing was positively associated with temperature-taking ( $\chi^2=493.11$ ,  $p<0.001$ ) and hand-sanitising ( $\chi^2=498.55$ ,  $p<0.001$ ). Compliance with temperature-taking was positively associated with hand-sanitising ( $\chi^2=802.16$ ,  $p<0.001$ ).

Logistic regression analysis was employed to investigate the predictors for compliance with each mitigation measure: home quarantine, mask-wearing, temperature-taking and hand-sanitising. Results showed that higher risk-exposure was positively associated with compliance with all measures except home quarantine. Age was positively associated with higher compliance with masking-wearing and hand-sanitising ( $p<0.0125$ ), yet inversely associated with home quarantine. Interestingly, whilst the male gender was associated with lower compliance with home quarantine order, it was found positively associated with mask-wearing and temperature-taking behaviours (Table 2).

Table 2. Indicators for compliance with respective mitigation measures

|                                      | Compliance vs. Non. Compliance<br>OR (95%CI) |
|--------------------------------------|----------------------------------------------|
| <i>Home Quarantine</i>               |                                              |
| <b>Gender, Male</b>                  | <b>0.61 (0.51-0.73)</b>                      |
| Age                                  | 0.99 (0.98-0.999)*                           |
| Regional Risk-exposure               | 0.99 (0.90-1.08)                             |
| Timeliness for Policy Implementation | 1.003 (0.99-1.02)                            |
| <i>Mask-Wearing</i>                  |                                              |
| <b>Gender, Male</b>                  | <b>1.79 (1.49-2.16)</b>                      |
| <b>Age</b>                           | <b>1.03 (1.02-1.04)</b>                      |
| <b>Regional Risk-exposure</b>        | <b>1.41 (1.28-1.54)</b>                      |
| Timeliness for Policy Implementation | 0.99 (0.98-1.01)                             |
| <i>Temperature-taking</i>            |                                              |
| <b>Gender, Male</b>                  | <b>1.27 (1.05-1.53)</b>                      |
| Age                                  | 1.005 (0.995-1.02)                           |



|                                      |                         |
|--------------------------------------|-------------------------|
| <b>Regional Risk-exposure</b>        | <b>1.40 (1.28-1.54)</b> |
| Timeliness for Policy Implementation | 1.016 (0.998 -1.035)    |
| <i>Hand-sanitising</i>               |                         |
| Gender, Male                         | 1.14 (0.95-1.36)        |
| <b>Age</b>                           | <b>1.02 (1.01-1.04)</b> |
| <b>Regional Risk-exposure</b>        | <b>1.39 (1.27-1.52)</b> |
| Timeliness for Policy Implementation | 1.01 (0.995-1.03)       |

**Boldface indicates significance,  $p < 0.0125$**

\*. *Trend to significance ( $0.0125 < p < 0.05$ )*

Gender-specific compliance with each personal protective measure is presented in Figure 1.

Whilst males were less prone to be compliant with home quarantine order, they were more likely to abide by the other 3 personal protective measures.

Interestingly, from the distribution graph, the mid-age groups (31-40 and 41-50) was the most non-compliant age group for home quarantine order, nevertheless also the most compliant for other protective behaviours (Figure 2).

Further analysis showed that, the 31-40 age group was less compliant to the home quarantine order (OR=0.71 [0.54-0.93]), compared to the reference group ( $\leq 20$ ; Figure 3). Yet they were compliant to mask-wearing (OR=1.96, 95%CI=1.46-2.64), hand-sanitising (OR=2.24, 95% CI=1.70-2.96), and temperature-taking (OR=1.65, 95% CI=1.23-2.21). A similar pattern for compliance was also observed in the 41-50 age group, where they were less compliant to home quarantine (OR=0.67 [0.46-0.97]), nonetheless more compliant to mask-wearing (OR=1.88[1.24-2.87]) and hand-sanitising (OR=1.51[1.03-2.19]).

## DISCUSSION

To our knowledge, the present study is amongst the first to examine demographic and social indicators and correlates of the general public's compliance to personal protective measures during the COVID-19 outbreak in China. The main findings from the present study is that among all demographic and social factors, age, gender and risk of exposure are the three main indicators for behavioural compliance to the protective measures.

Among all of the mitigation measures various countries have implemented during COVID-19, social distancing has been the most emphasised measure, and proven the most effective one.<sup>12</sup>

1  
2  
3 China introduced the strict social distancing order in February when the epidemic was  
4 spreading at an alarming rate and causing an increasing number of deaths in the nation.<sup>5</sup> The  
5 execution of such an order was combined with home quarantine, the shutdown of all public  
6 places, including shops, malls, restaurants and entertainment venues, and forbidding of mass  
7 gatherings. With such a rigorous combination, the domestic and global spreading speed of the  
8 virus showed a significant slowdown from mid-February till mid-March.<sup>13</sup>  
9

10  
11  
12  
13  
14  
15 In the present study, males were found less likely to be compliant with the social-distancing  
16 order (72% vs. 74%), nevertheless more likely to follow other personal protective approaches,  
17 such as mask-wearing (83% vs. 74%), temperature-taking (81% vs. 77%), and hand-sanitising  
18 (77% vs. 75%). One plausible explanation for the gender difference in the behavioural  
19 compliance is that males, especially in the mid-age group, are identified to be the pillar of the  
20 family. Hence during a public health emergency like COVID-19, males are more expected to  
21 carry on with family errands and even go to work. In the present study, 87 reported violation  
22 of the home quarantine order. Among whom, 60 went out for shopping/collection of essential  
23 goods (home supplies and grocery), with 67% of them being male. Apart from this, 24 reported  
24 to have left home for work purposes, among whom 67% were male. Our findings support  
25 previous literature that reported males were more likely to leave their homes during the early  
26 stages of the COVID-19 outbreak in the Hubei Province and other parts of China.<sup>8</sup> Interestingly,  
27 recent studies investigating behavioural compliance to safety measures (including mask-  
28 wearing, isolation) outside of China during COVID-19 have mixed results.<sup>14-18</sup> Nonetheless,  
29 explanations for non-compliance to safety measures centres around the level of knowledge and  
30 perception of the COVID-19 pandemic. Similarly, past pandemic research have shown that  
31 females are more likely to adhere to more avoidant behaviors such as hand washing and  
32 wearing masks.<sup>8-10</sup> <sup>19</sup> Conversely, we found that males are more likely to comply with these  
33 avoidance behaviours apart from social distancing. Our findings thus demonstrate that the  
34 impact of economic conditions alongside the desire to remain safe may be the predominant  
35 drivers for the disparities in behavioural compliance. However, behind such a potential driving  
36 force lies cultural expectations that adult males are subjected to in Chinese society. From a  
37 cultural standpoint, the male breadwinner model still exists in China's social fabric today  
38 despite the increasingly blurred gender roles in modern-day China.<sup>20</sup> The over 2000-year old  
39 Confucian model posits a gender role divide between males and females where males undertake  
40 an 'outside' role and are expected to provide for the family, while females take on the  
41 caregiving role ('inside' role) to tend to household matters.<sup>21-24</sup> A strong emphasis is also  
42  
43  
44  
45  
46  
47  
48  
49  
50  
51  
52  
53  
54  
55  
56  
57  
58  
59  
60

1  
2  
3 placed on filial piety, where providing and caring for one's elderly parents is an esteemed and  
4 obligatory duty.<sup>25</sup> As a result, the conformity to role expectations in Chinese society may  
5 explain the non-compliance by males to social distancing measures as they feel more obligated  
6 to meet their economic responsibilities to continue providing for the family, even during a  
7 public health crisis. Our results challenge several work on COVID-19 preventive behaviours  
8 that view behavioural compliance singularly as the result of partisanship, perceptions  
9 surrounding its effectiveness and the infection risks.<sup>17 26</sup> Our study lends some support to Zhong  
10 and colleagues' findings that males were more likely to leave the house to go to crowded places  
11 during the outbreak in China,<sup>8</sup> but contradict in mask-wearing compliance. Higher likelihood  
12 of risk-taking behaviour in males was noted as an explanation for their non-compliance. On  
13 the contrary, we found that males were compliant to other preventive measures to mitigate risk.  
14 Notably, Zhong and colleagues gathered their data between January 27 and February 1 2020,<sup>8</sup>  
15 a week after the lockdown in China, three weeks earlier than when our data were collected.  
16 Therefore, strict restrictions and public health education by authorities during the three weeks  
17 may have been effective and enabled males to engage in more preventive measures even though  
18 they were still leaving home for work.  
19  
20  
21  
22  
23  
24  
25  
26  
27  
28  
29  
30  
31

32  
33 Though gender played an important role in predicting compliance with home quarantine in  
34 people aged 21 years old and above, it did not make a difference in people under 21 years old.  
35 Studies have shown that late adolescents tend not to comply with social distancing and stay  
36 home orders due to their likelihood in engaging in risky behaviors.<sup>8 27</sup> However, our study  
37 found that people in the mid-age group, especially those between 31-40 and 41-50 years old  
38 (Figure 2) were driving this significance of lower compliance with home quarantine order, as  
39 compared to younger adults <21 years of age. Notably, those above 50 years old had a higher  
40 likelihood of staying home similar to those below 21. A plausible explanation for the reduced  
41 social distancing compliance in the 31-50 age group is that a large number of these people may  
42 be salarymen and have to leave home for work. On the other hand, those above 50 may be  
43 aware of the risks involved and have fewer reasons to leave the house. Furthermore, people in  
44 the >50 age group may have reduced mobility function.<sup>28</sup> Hence, those between 31 to 50 years  
45 old have lesser compliance to home quarantine due to economic reasons where they have to go  
46 out to work compared to those under 21 where majority of them were likely to be high school  
47 or university students, hence could not access campus due to temporary shutdown of all schools  
48 nationwide during the epidemic.<sup>29</sup>  
49  
50  
51  
52  
53  
54  
55  
56  
57  
58  
59  
60

1  
2  
3 The present study has several strengths and weaknesses. To our knowledge, the present study  
4 is amongst the first to examine the effect of demographical and social correlates on the  
5 compliance of public health mitigation measures, especially social distancing, during the  
6 COVID-19 outbreak. Furthermore, the study was conducted during the peak of the spread of  
7 COVID-19 in China and gathered nationwide data from participants in China. Therefore, the  
8 findings obtained are especially vital in understanding the motivations behind the lack of  
9 compliance with mitigation measures, particularly during the heightened period of the outbreak.  
10 We observed a difference in adherence to safety measures (e.g., mask-wearing) by males  
11 between two timeframes of the pandemic in China<sup>8</sup>, suggesting that public health education  
12 and strict restrictions may have impacted the public's perception and compliance. Hence, these  
13 results help further inform public health authorities and political leaders in the way they  
14 implement mitigation measures and administer financial and psychological aid to the  
15 community. Notably, the present study lacked important demographic factors such as education  
16 level and occupational status, which could have further informed future mitigation measures.  
17 A non-probability sample was used in this study, thus rendering the effect of p-values and  
18 confidence intervals not strictly valid, or valid only under the assumption that the sample is  
19 comparable to a random sample. The study's outcome variables were also self-reported  
20 compliance instead of actual compliance, suggesting the potential impact of social desirability  
21 bias in under- or over-reporting compliance to safety measures.<sup>30</sup> However, the online mode of  
22 data collection and the anonymity of the survey may have mitigated such potential biases.  
23 Moreover, as the study was conducted through an online survey, the sample was limited to  
24 those with access to digital technology and Internet. Therefore, we were unable to determine if  
25 this subset of the population complied to mitigation measures as well as the factors associated  
26 with it. Information obtained from this subset is essential as they may be more vulnerable to  
27 the virus due to lack of access to extensive public health awareness and mitigation measures  
28 online. While the lack of access to digital technology is a real limitation, future studies should  
29 attempt to reach out to this subset of the population. Retrospective studies could be conducted  
30 to assess their accordance with mitigation measures, specifically social distancing, and the role  
31 of psychosocial indicators and correlates on the compliance. Additionally, it would be  
32 interesting to examine the anxiety levels of those in the under 21 group that had a significant  
33 impact on their compliance with social distancing during the outbreak. Access to social media  
34 and overwhelming information provided by the media every day could be a factor that fuelled  
35 the heightened levels of anxiety.  
36  
37  
38  
39  
40  
41  
42  
43  
44  
45  
46  
47  
48  
49  
50  
51  
52  
53  
54  
55  
56  
57  
58  
59  
60

1  
2  
3 The non-compliance with public health mitigation measures, particularly home quarantine, was  
4 largely attributed to the male gender, and being in the middle-aged group. Our study found that  
5 while males in the mid-age group were least compliant with social distancing, they were most  
6 compliant to other measures (i.e., mask-wearing, hand-sanitising, and temperature-taking),  
7 possibly due to their economic responsibilities and need to fulfil the breadwinner role  
8 expectation. As the COVID-19 outbreak is still ongoing, public health authorities and  
9 governments could target this population in their future measures and aid that are provided  
10 during this pandemic.  
11  
12  
13  
14  
15  
16  
17  
18

### 19 **Figure Legends:**

20 Figure 1. Gender-specific percentages for behavioural compliance

21 Figure 2. Age-specific percentages for compliance with individual protective behaviours

22 Figure 3. Adjusted ORs and 95% CI of different age-blocks for compliance with individual  
23 protective behaviours. Analysis controlled for gender, days to policy implementation and risk  
24 exposure  
25  
26  
27  
28  
29

30  
31 *Acknowledgements:* The authors would like to acknowledge all study participants for their  
32 cooperation.  
33

34 *Contributors:* XX\* and YQ conceptualized and designed the study. XX\* drafted the  
35 manuscript. YQ supervised data analysis and interpretation of data. XX\*, WZ and XXH  
36 acquired the data. XX\* and KAC analyzed and interpreted the data. XX, WZ and XXH revised  
37 the manuscript for intellectual content. YQ and KAC critically revised the manuscript for  
38 intellectual content.  
39  
40  
41  
42

43 \*Xu Xin

44  
45 *Disclaimer:* The funders had no role in study design, data analysis and interpretation, and  
46 writing of the manuscript.  
47

48 *Funding:* This study is supported by the National Natural Science Foundation of China  
49 (71974170), Soft Science Project of Science Technology Department of Zhejiang Province of  
50 China (2019C35025) and Youth Project of the Center for Health Policy and Hospital  
51 Management of Zhejiang University (2019WSZ007).  
52  
53

54 *Competing interests:* None declared.  
55

56 *Patient consent for publication:* Not required.  
57

58 *Ethics approval:* This study has been approved by the Ethics Commission of Zhejiang  
59 University (ID: ZGL202005-01). Informed consent was obtained from participants prior to  
60

1  
2  
3 taking part in the study.  
4

5 *Data availability statement:* Data are available upon request. Original data can be requested  
6 from the study team ([xuxinsummer@zju.edu.cn](mailto:xuxinsummer@zju.edu.cn) and [chianyoung@zju.edu.cn](mailto:chianyoung@zju.edu.cn)).  
7  
8  
9  
10  
11  
12  
13  
14  
15  
16  
17  
18  
19  
20  
21  
22  
23  
24  
25  
26  
27  
28  
29  
30  
31  
32  
33  
34  
35  
36  
37  
38  
39  
40  
41  
42  
43  
44  
45  
46  
47  
48  
49  
50  
51  
52  
53  
54  
55  
56  
57  
58  
59  
60

For peer review only

**REFERENCES**

1. WHO-China Joint Mission. Report of the WHO-China Joint Mission on Coronavirus Disease 2019 (COVID-19): World Health Organization, 2020.
2. General Office of the People's Government of Hubei Province. Announcement of the People's Government of Hubei Province on Strengthening the Prevention and Control of Pneumonia Caused by New Coronavirus Infection. 2020a. Retrieved from [http://www.hubei.gov.cn/xxgk/gsgg/202001/t20200122\\_2013895.shtml](http://www.hubei.gov.cn/xxgk/gsgg/202001/t20200122_2013895.shtml)
3. World Health Organisation. Coronavirus disease (COVID-19) advice for the public. 2020
4. Zhang Y, Jiang B, Yuan J, et al. The impact of social distancing and epicenter lockdown on the COVID-19 epidemic in mainland China: A data-driven SEIQR model study. 2020 doi: 10.1101/2020.03.04.20031187
5. China Centre for Disease Control and Prevention. 新型冠状病毒肺炎 个人防护怎么做. China, 2020.
6. General Office of the People's Government of Hubei Province. Interim Measures for the Prevention and Control of Pneumonia Outbreak of Novel Coronavirus Infection in Wuhan. 2020b. Retrieved from [http://www.hubei.gov.cn/zhuanti/2020/gzxxgzbd/zxtb/202001/t20200130\\_2016578.shtml](http://www.hubei.gov.cn/zhuanti/2020/gzxxgzbd/zxtb/202001/t20200130_2016578.shtml)
7. Leung GM, Lam, T-H, Ho, L-M, et al. The impact of community psychological responses on outbreak control for severe acute respiratory syndrome in Hong Kong. *J Epidemiol Community Health* 2003;57(11):857-63. doi: 10.1136/jech.57.11.857
8. Zhong BL, Luo W, Li HM, et al. Knowledge, attitudes, and practices towards COVID-19 among Chinese residents during the rapid rise period of the COVID-19 outbreak: a quick online cross-sectional survey. *Int J Biol Sci* 2020;16(10):1745-52. doi: 10.7150/ijbs.45221 [published Online First: 2020/04/01]
9. Moran KR, Del Valle SY. A Meta-Analysis of the Association between Gender and Protective Behaviors in Response to Respiratory Epidemics and Pandemics. *PLoS One* 2016;11(10):e0164541. doi: 10.1371/journal.pone.0164541 [published Online First: 2016/10/22]
10. Bish A, Michie S. Demographic and attitudinal determinants of protective behaviours during a pandemic: A review. *Br. J. Health Psychol.* 2010;15:797-824. doi: 10.1348/135910710X485826
11. von Elm E, Altman, DG, Egger, M et al. The Strengthening the Reporting of Observational



- 1  
2  
3 Studies in Epidemiology (STROBE) Statement: Guidelines for Reporting  
4 Observational Studies. *Epidemiology* 2007;18(6):800-04. doi:  
5 10.1097/EDE.0b013e3181577654  
6  
7  
8  
9 12. Kakodkar P, Kaka N, Baig MN. A Comprehensive Literature Review on the Clinical  
10 Presentation, and Management of the Pandemic Coronavirus Disease 2019 (COVID-  
11 19). *Cureus* 2020;12(4):e7560. doi: 10.7759/cureus.7560 [published Online First:  
12 2020/04/10]  
13  
14  
15 13. Hao K. China's travel lockdown sharply slowed the global spread of Covid-19. MIT  
16 Technology Review, 2020.  
17  
18 14. Afzal M, Khan, A, Qureshi, UUR et al. Community-Based Assessment of Knowledge,  
19 Attitude, Practices and Risk Factors Regarding COVID-19 Among Pakistanis  
20 Residents During a Recent Outbreak: A Cross-Sectional Survey. *J. Community Health*  
21 2020;13:1-11. doi: 10.1007/s10900-020-00875-z  
22  
23  
24 15. Meier K, Glatz, T, Guijt, MC, et al. COVID-19 Survey Study Group. Public perspectives  
25 on protective measures during the COVID-19 pandemic in the Netherlands, Germany  
26 and Italy: A survey study. *PLoS One* 2020;15:1-17. doi: 10.1371/journal.  
27 pone.0236917  
28  
29  
30 16. Mansuri F, Zalat, MM, Khan, AA, et al. Estimating the public response to mitigation  
31 measures and selfperceived behaviours towards the COVID-19 pandemic. *Taibah Univ.*  
32 *Med. Sci.* 2020;July 4:1-6. doi: 10.1016/j.jtumed.2020.06.003  
33  
34  
35 17. de Bruine WB, D. Relationships Between Initial COVID-19 Risk Perceptions and  
36 Protective Health Behaviors: A National Survey. *Am. J. Prev. Med.* 2020;59(2):157-  
37 67. doi: 10.1016/j.amepre.2020.05.001  
38  
39  
40 18. Honarvar B, Lankarani, KB, Kharmandar, A, et al. Knowledge, attitudes, risk perceptions,  
41 and practices of adults toward COVID-19: a population and field-based study from Iran.  
42 *Int. J. Public Health* 2020;Jun 24:1-9. doi: 10.1007/s00038-020-01406-2  
43  
44  
45 19. de la Vega R, Barquin, R. R., Boros, S., et al. Could Attitudes Toward COVID-19 in Spain  
46 Render Men More Vulnerable Than Women? 2020, April 2 doi: 10.31234/osf.io/dyxqn.  
47  
48  
49 20. Attane' I. Being a Woman in China Today: A Demography of Gender. *China Perspectives*  
50 2012;4:5-15.  
51  
52  
53 21. Lebra TS. Confucian gender role and personal fulfillment for Japanese women. Albany,  
54 NY: State University of New York Press. 1998:209–227.  
55  
56  
57 22. Qian Y, Qian Z. Work, Family, and Gendered Happiness Among Married People in Urban  
58 China. *Soc. Indic. Res.* 2014;121(1):61-74. doi: 10.1007/s11205-014-0623-9  
59  
60



- 1
- 2
- 3 23. Zuo J. From Revolutionary Comrades to Gendered Partners: Marital Construction of
- 4 Breadwinning in Post-Mao Urban China. *J. Fam. Issues* 2003;24:314-37. doi:
- 5 10.1177/0192513X02250888
- 6
- 7
- 8 24. W-M T. Confucius and Confucianism. In: Vos WHSGAD, ed. *Confucianism and the*
- 9 *Family*. Albany, New York: State University of New York Press 1998:3-36.
- 10
- 11 25. Stafford C. *The roads of Chinese childhood: Learning and Identification in Angang*.
- 12 *Cambridge, UK: Cambridge University Press 1995*.
- 13
- 14 26. Clements J. *Knowledge and Behaviors Toward COVID-19 Among US Residents During*
- 15 *the Early Days of the Pandemic: Cross-Sectional Online Questionnaire*. *JMIR Public*
- 16 *Health & Surveillance* 2020;6:e19161. doi: 10.2196/19161
- 17
- 18 27. Duell N, Steinberg, L, Icenogle, G, et al. Age Patterns in Risk Taking Across the World. *J*
- 19 *Youth Adolescence* 2018;47:1052–72. doi: 10.1007/s10964-017-0752-y
- 20
- 21 28. Gardener E, Huppert, FA, Guralnik, JM et al. Middle-Aged and Mobility-Limited:
- 22 *Prevalence of Disability and Symptom Attributions in a National Survey*. *J Gen Intern*
- 23 *Med* 2006;21(10):1091–96. doi: 10.1111/j.1525-1497.2006.00564.x
- 24
- 25 29. Zhu Q. Why did China close all schools? *China Daily* 2020.
- 26
- 27 30. Nederhof A. Methods of coping with social desirability bias: A review. *Eur. J. Soc. Psychol.*
- 28 *1985;15(3):263-80*. doi: 10.1002/ejsp.2420150303
- 29
- 30
- 31
- 32
- 33
- 34
- 35
- 36
- 37
- 38
- 39
- 40
- 41
- 42
- 43
- 44
- 45
- 46
- 47
- 48
- 49
- 50
- 51
- 52
- 53
- 54
- 55
- 56
- 57
- 58
- 59
- 60

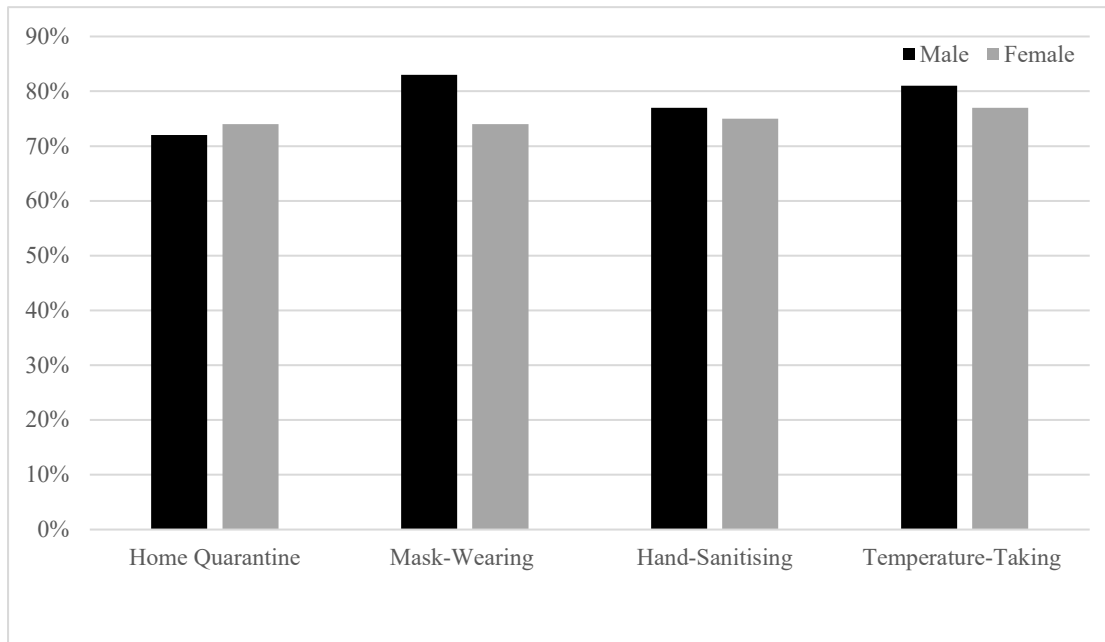

Figure 1. Gender-specific percentages for behavioural compliance

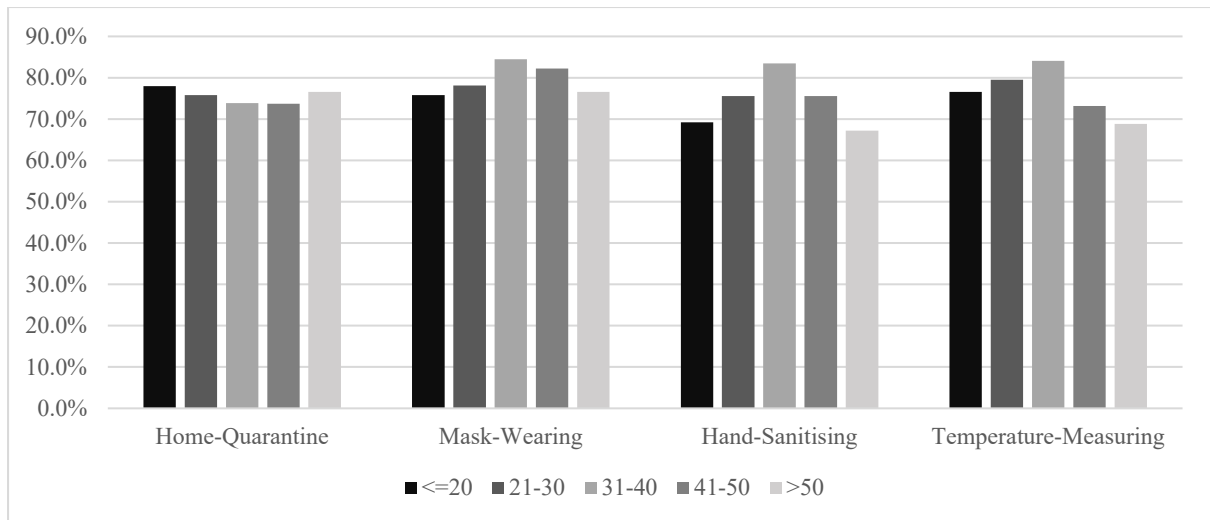

Figure 2. Age-specific distribution for compliance with individual protective behaviours

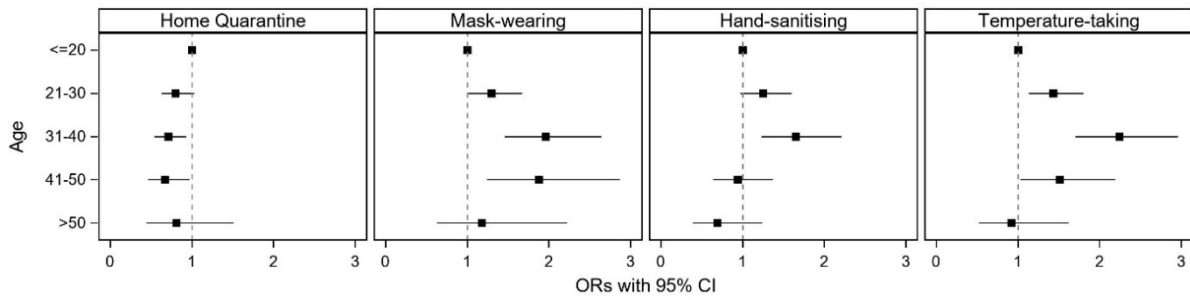

Figure 3. Adjusted ORs and 95% CI of different age-blocks for compliance with individual protective behaviours. Analysis controlled for gender, days to policy implementation and risk exposure.

## 中国社区居民在 COVID-19 期间个人防护行为的调查

你好！这里是浙江大学公共卫生学院发起的新冠疫情调研组。新冠肺炎的肆虐给人民健康带来了极大的威胁。但是我们定会众志成城，共同战“疫”！我们在此诚挚邀请您参加本次调研，您的参与将会帮助我们更好地了解民众个人防护行为。

本次调研将会分两次进行。我们会邀请您参与多次答题。本次问卷大约需要 1-2 分钟完成。请仔细阅读清楚问题之后填写。每次提交问卷后，经过系统核查，第一次问卷您将得到 3 元红包，第二次问卷您将得到 5 元红包。感谢您一如既往的支持和参与，让我们上下一心，携手并进，共同抗击新冠病毒！

本问卷不涉及您的任何隐私。您的所有答案将严格保密，仅用于疫情应对的研究。您有权随时退出本次调研。

如您已知晓您的全部权利，乐于自愿参与，并能和我们一起坚持每一次的答题，请点击下面的“下一页”按钮参与调研。

和您一起参与答题的，还有千万个和您一样在意疫情发展，支持疫情防控工作的中国民众。让我们万众一心，赢得这场没有硝烟的战役！

1. [填空题] 请选择省份城市与地区: \_\_\_\_\_
2. [填空题] 您的手机号后 4 位为 \_\_\_\_\_ (仅用于编号)
3. [单选题] 您的性别是
  - 男
  - 女
4. [填空题] 请输入您的出生年份: \_\_\_\_\_
5. [单选题] 最近三天，您的出门次数为
  - 0-1 次 (请跳至第 8 题)
  - >1 次
6. [单选题] 您今天是否出门
  - 是
  - 否 (请跳至第 8 题)
7. [单选题] 您今天出门的原因是
  - 购物
  - 取东西
  - 工作
  - 去医院
  - 其他原因，请说明 \_\_\_\_\_
8. [单选题] 您今天是否佩戴口罩
  - 是
  - 否
9. [单选题] 您今天是否使用消毒液或 75%酒精消毒
  - 是
  - 否
10. [单选题] 您今天是否自测体温
  - 是
  - 否

**Survey translated to English:**

## **Investigation of individual protection behaviour of Chinese community residents during COVID-19**

Hello! This is the COVID-19 research group launched by the School of Public Health, Zhejiang University. COVID-19 poses a significant threat to people's health. However, we will come together to fight COVID-19. We sincerely invite you to participate in this survey, and your participation will help us better understand people's personal protection behaviours.

There are two surveys in this study. You will be invited to answer several questions. It will take about 1-2 minutes to complete the questionnaire. Please read the questions carefully and fill them out. After submitting the questionnaire, you will receive 3 yuan for the first survey and 5 yuan for the second survey. Thank you for your continued support and participation. Let us fight COVID-19 hand in hand.

This questionnaire is strictly private and confidential. All your answers will be kept strictly confidential and used only for research in response to the outbreak, and you have the right to withdraw from the survey at any time.

If you fully understand your rights, are willing to volunteer, and can answer every question, please click the "next page" button below to participate in the research.

There are thousands of people who care about the evolution of the epidemic and support epidemic prevention and control efforts like you who are participating in the survey. Let us unite as one to win the battle without smoke!

1. [Completion] Please state your province and city: \_\_\_\_\_
2. [Completion] Please fill in the last 4 digits of your cell phone number: \_\_\_\_\_ (Just for numbering)
3. [Multiple Choice] What is your gender?  
 Male       Female
4. [Completion] Please fill in your year of birth: \_\_\_\_\_
5. [Multiple Choice] The number of times you have gone out in the last three days is  
 0-1 time (Please skip to question 8)       >1
6. [Multiple Choice] Have you been out today?  
 YES       No
7. [Multiple Choice] The reason you went out today is  
 shopping  
 take things  
 work  
 go to the hospital  
 other reasons. Please indicate the reason in detail \_\_\_\_\_

1  
2  
3  
4  
5  
6  
7  
8  
9  
10  
11  
12  
13  
14  
15  
16  
17  
18  
19  
20  
21  
22  
23  
24  
25  
26  
27  
28  
29  
30  
31  
32  
33  
34  
35  
36  
37  
38  
39  
40  
41  
42  
43  
44  
45  
46  
47  
48  
49  
50  
51  
52  
53  
54  
55  
56  
57  
58  
59  
60

8. [Multiple Choice] Are you wearing a mask today?

- YES
- No

9. [Multiple Choice] Have you used disinfectant or 75% alcohol today?

- YES
- No

10. [Multiple Choice] Have you taken your temperature today?

- YES
- No

For peer review only

# Reporting checklist for cross sectional study.

Based on the STROBE cross sectional guidelines.

## Instructions to authors

Complete this checklist by entering the page numbers from your manuscript where readers will find each of the items listed below.

Your article may not currently address all the items on the checklist. Please modify your text to include the missing information. If you are certain that an item does not apply, please write "n/a" and provide a short explanation.

Upload your completed checklist as an extra file when you submit to a journal.

In your methods section, say that you used the STROBE cross sectional reporting guidelines, and cite them as:

von Elm E, Altman DG, Egger M, Pocock SJ, Gotsche PC, Vandenbroucke JP. The Strengthening the Reporting of Observational Studies in Epidemiology (STROBE) Statement: guidelines for reporting observational studies.

|                           |                                                                                                        | Page   |
|---------------------------|--------------------------------------------------------------------------------------------------------|--------|
|                           | Reporting Item                                                                                         | Number |
| <b>Title and abstract</b> |                                                                                                        |        |
| Title                     | <a href="#">#1a</a> Indicate the study's design with a commonly used term in the title or the abstract | 1      |



|    |                      |                     |                                                                 |     |
|----|----------------------|---------------------|-----------------------------------------------------------------|-----|
| 1  | Abstract             | <a href="#">#1b</a> | Provide in the abstract an informative and balanced summary     | 2   |
| 2  |                      |                     | of what was done and what was found                             |     |
| 3  |                      |                     |                                                                 |     |
| 4  |                      |                     |                                                                 |     |
| 5  |                      |                     |                                                                 |     |
| 6  | <b>Introduction</b>  |                     |                                                                 |     |
| 7  |                      |                     |                                                                 |     |
| 8  |                      |                     |                                                                 |     |
| 9  |                      |                     |                                                                 |     |
| 10 | Background /         | <a href="#">#2</a>  | Explain the scientific background and rationale for the         | 3   |
| 11 | rationale            |                     | investigation being reported                                    |     |
| 12 |                      |                     |                                                                 |     |
| 13 |                      |                     |                                                                 |     |
| 14 |                      |                     |                                                                 |     |
| 15 | Objectives           | <a href="#">#3</a>  | State specific objectives, including any prespecified           | 3   |
| 16 |                      |                     | hypotheses                                                      |     |
| 17 |                      |                     |                                                                 |     |
| 18 |                      |                     |                                                                 |     |
| 19 |                      |                     |                                                                 |     |
| 20 | <b>Methods</b>       |                     |                                                                 |     |
| 21 |                      |                     |                                                                 |     |
| 22 |                      |                     |                                                                 |     |
| 23 | Study design         | <a href="#">#4</a>  | Present key elements of study design early in the paper         | 4   |
| 24 |                      |                     |                                                                 |     |
| 25 |                      |                     |                                                                 |     |
| 26 | Setting              | <a href="#">#5</a>  | Describe the setting, locations, and relevant dates, including  | 4   |
| 27 |                      |                     | periods of recruitment, exposure, follow-up, and data           |     |
| 28 |                      |                     | collection                                                      |     |
| 29 |                      |                     |                                                                 |     |
| 30 |                      |                     |                                                                 |     |
| 31 |                      |                     |                                                                 |     |
| 32 |                      |                     |                                                                 |     |
| 33 |                      |                     |                                                                 |     |
| 34 | Eligibility criteria | <a href="#">#6a</a> | Give the eligibility criteria, and the sources and methods of   | 4   |
| 35 |                      |                     | selection of participants.                                      |     |
| 36 |                      |                     |                                                                 |     |
| 37 |                      |                     |                                                                 |     |
| 38 |                      |                     |                                                                 |     |
| 39 |                      |                     |                                                                 |     |
| 40 |                      | <a href="#">#7</a>  | Clearly define all outcomes, exposures, predictors, potential   | n/a |
| 41 |                      |                     | confounders, and effect modifiers. Give diagnostic criteria, if |     |
| 42 |                      |                     | applicable                                                      |     |
| 43 |                      |                     |                                                                 |     |
| 44 |                      |                     |                                                                 |     |
| 45 |                      |                     |                                                                 |     |
| 46 |                      |                     |                                                                 |     |
| 47 | Data sources /       | <a href="#">#8</a>  | For each variable of interest give sources of data and details  | 4   |
| 48 | measurement          |                     | of methods of assessment (measurement). Describe                |     |
| 49 |                      |                     | comparability of assessment methods if there is more than       |     |
| 50 |                      |                     | one group. Give information separately for for exposed and      |     |
| 51 |                      |                     | unexposed groups if applicable.                                 |     |
| 52 |                      |                     |                                                                 |     |
| 53 |                      |                     |                                                                 |     |
| 54 |                      |                     |                                                                 |     |
| 55 |                      |                     |                                                                 |     |
| 56 |                      |                     |                                                                 |     |
| 57 |                      |                     |                                                                 |     |
| 58 |                      |                     |                                                                 |     |
| 59 |                      |                     |                                                                 |     |
| 60 |                      |                     |                                                                 |     |

|    |                |                      |                                                               |     |
|----|----------------|----------------------|---------------------------------------------------------------|-----|
| 1  | Bias           | <a href="#">#9</a>   | Describe any efforts to address potential sources of bias     | 4   |
| 2  |                |                      |                                                               |     |
| 3  |                |                      |                                                               |     |
| 4  | Study size     | <a href="#">#10</a>  | Explain how the study size was arrived at                     | 5   |
| 5  |                |                      |                                                               |     |
| 6  |                |                      |                                                               |     |
| 7  | Quantitative   | <a href="#">#11</a>  | Explain how quantitative variables were handled in the        | 5   |
| 8  | variables      |                      | analyses. If applicable, describe which groupings were        |     |
| 9  |                |                      | chosen, and why                                               |     |
| 10 |                |                      |                                                               |     |
| 11 |                |                      |                                                               |     |
| 12 |                |                      |                                                               |     |
| 13 |                |                      |                                                               |     |
| 14 |                |                      |                                                               |     |
| 15 | Statistical    | <a href="#">#12a</a> | Describe all statistical methods, including those used to     | 4   |
| 16 | methods        |                      | control for confounding                                       |     |
| 17 |                |                      |                                                               |     |
| 18 |                |                      |                                                               |     |
| 19 |                |                      |                                                               |     |
| 20 | Statistical    | <a href="#">#12b</a> | Describe any methods used to examine subgroups and            | 5   |
| 21 | methods        |                      | interactions                                                  |     |
| 22 |                |                      |                                                               |     |
| 23 |                |                      |                                                               |     |
| 24 |                |                      |                                                               |     |
| 25 |                |                      |                                                               |     |
| 26 | Statistical    | <a href="#">#12c</a> | Explain how missing data were addressed                       | 5   |
| 27 | methods        |                      |                                                               |     |
| 28 |                |                      |                                                               |     |
| 29 |                |                      |                                                               |     |
| 30 |                |                      |                                                               |     |
| 31 | Statistical    | <a href="#">#12d</a> | If applicable, describe analytical methods taking account of  | n/a |
| 32 | methods        |                      | sampling strategy                                             |     |
| 33 |                |                      |                                                               |     |
| 34 |                |                      |                                                               |     |
| 35 |                |                      |                                                               |     |
| 36 | Statistical    | <a href="#">#12e</a> | Describe any sensitivity analyses                             | n/a |
| 37 | methods        |                      |                                                               |     |
| 38 |                |                      |                                                               |     |
| 39 |                |                      |                                                               |     |
| 40 |                |                      |                                                               |     |
| 41 |                |                      |                                                               |     |
| 42 | <b>Results</b> |                      |                                                               |     |
| 43 |                |                      |                                                               |     |
| 44 |                |                      |                                                               |     |
| 45 | Participants   | <a href="#">#13a</a> | Report numbers of individuals at each stage of study—eg       | 5   |
| 46 |                |                      | numbers potentially eligible, examined for eligibility,       |     |
| 47 |                |                      | confirmed eligible, included in the study, completing follow- |     |
| 48 |                |                      | up, and analysed. Give information separately for for         |     |
| 49 |                |                      | exposed and unexposed groups if applicable.                   |     |
| 50 |                |                      |                                                               |     |
| 51 |                |                      |                                                               |     |
| 52 |                |                      |                                                               |     |
| 53 |                |                      |                                                               |     |
| 54 |                |                      |                                                               |     |
| 55 |                |                      |                                                               |     |
| 56 |                |                      |                                                               |     |
| 57 | Participants   | <a href="#">#13b</a> | Give reasons for non-participation at each stage              | 5   |
| 58 |                |                      |                                                               |     |
| 59 |                |                      |                                                               |     |
| 60 |                |                      |                                                               |     |

|    |                   |                      |                                                                   |     |
|----|-------------------|----------------------|-------------------------------------------------------------------|-----|
| 1  | Participants      | <a href="#">#13c</a> | Consider use of a flow diagram                                    | n/a |
| 2  |                   |                      |                                                                   |     |
| 3  |                   |                      |                                                                   |     |
| 4  | Descriptive data  | <a href="#">#14a</a> | Give characteristics of study participants (eg demographic,       | 5   |
| 5  |                   |                      | clinical, social) and information on exposures and potential      |     |
| 6  |                   |                      | confounders. Give information separately for exposed and          |     |
| 7  |                   |                      | unexposed groups if applicable.                                   |     |
| 8  |                   |                      |                                                                   |     |
| 9  |                   |                      |                                                                   |     |
| 10 |                   |                      |                                                                   |     |
| 11 |                   |                      |                                                                   |     |
| 12 |                   |                      |                                                                   |     |
| 13 |                   |                      |                                                                   |     |
| 14 | Descriptive data  | <a href="#">#14b</a> | Indicate number of participants with missing data for each        | 5   |
| 15 |                   |                      | variable of interest                                              |     |
| 16 |                   |                      |                                                                   |     |
| 17 |                   |                      |                                                                   |     |
| 18 |                   |                      |                                                                   |     |
| 19 | Outcome data      | <a href="#">#15</a>  | Report numbers of outcome events or summary measures.             | 4   |
| 20 |                   |                      | Give information separately for exposed and unexposed             |     |
| 21 |                   |                      | groups if applicable.                                             |     |
| 22 |                   |                      |                                                                   |     |
| 23 |                   |                      |                                                                   |     |
| 24 |                   |                      |                                                                   |     |
| 25 |                   |                      |                                                                   |     |
| 26 |                   |                      |                                                                   |     |
| 27 | Main results      | <a href="#">#16a</a> | Give unadjusted estimates and, if applicable, confounder-         | 6   |
| 28 |                   |                      | adjusted estimates and their precision (eg, 95% confidence        |     |
| 29 |                   |                      | interval). Make clear which confounders were adjusted for         |     |
| 30 |                   |                      | and why they were included                                        |     |
| 31 |                   |                      |                                                                   |     |
| 32 |                   |                      |                                                                   |     |
| 33 |                   |                      |                                                                   |     |
| 34 |                   |                      |                                                                   |     |
| 35 |                   |                      |                                                                   |     |
| 36 |                   |                      |                                                                   |     |
| 37 | Main results      | <a href="#">#16b</a> | Report category boundaries when continuous variables were         | 6   |
| 38 |                   |                      | categorized                                                       |     |
| 39 |                   |                      |                                                                   |     |
| 40 |                   |                      |                                                                   |     |
| 41 |                   |                      |                                                                   |     |
| 42 | Main results      | <a href="#">#16c</a> | If relevant, consider translating estimates of relative risk into | n/a |
| 43 |                   |                      | absolute risk for a meaningful time period                        |     |
| 44 |                   |                      |                                                                   |     |
| 45 |                   |                      |                                                                   |     |
| 46 |                   |                      |                                                                   |     |
| 47 |                   |                      |                                                                   |     |
| 48 | Other analyses    | <a href="#">#17</a>  | Report other analyses done—e.g., analyses of subgroups            | 6   |
| 49 |                   |                      | and interactions, and sensitivity analyses                        |     |
| 50 |                   |                      |                                                                   |     |
| 51 |                   |                      |                                                                   |     |
| 52 |                   |                      |                                                                   |     |
| 53 | <b>Discussion</b> |                      |                                                                   |     |
| 54 |                   |                      |                                                                   |     |
| 55 |                   |                      |                                                                   |     |
| 56 | Key results       | <a href="#">#18</a>  | Summarise key results with reference to study objectives          | 7   |
| 57 |                   |                      |                                                                   |     |
| 58 |                   |                      |                                                                   |     |
| 59 |                   |                      |                                                                   |     |
| 60 |                   |                      |                                                                   |     |

|    |                          |                     |                                                                |     |
|----|--------------------------|---------------------|----------------------------------------------------------------|-----|
| 1  | Limitations              | <a href="#">#19</a> | Discuss limitations of the study, taking into account sources  | 9   |
| 2  |                          |                     | of potential bias or imprecision. Discuss both direction and   |     |
| 3  |                          |                     | magnitude of any potential bias.                               |     |
| 4  |                          |                     |                                                                |     |
| 5  |                          |                     |                                                                |     |
| 6  |                          |                     |                                                                |     |
| 7  |                          |                     |                                                                |     |
| 8  |                          |                     |                                                                |     |
| 9  | Interpretation           | <a href="#">#20</a> | Give a cautious overall interpretation considering objectives, | 7-9 |
| 10 |                          |                     | limitations, multiplicity of analyses, results from similar    |     |
| 11 |                          |                     | studies, and other relevant evidence.                          |     |
| 12 |                          |                     |                                                                |     |
| 13 |                          |                     |                                                                |     |
| 14 |                          |                     |                                                                |     |
| 15 |                          |                     |                                                                |     |
| 16 | Generalisability         | <a href="#">#21</a> | Discuss the generalisability (external validity) of the study  | 9   |
| 17 |                          |                     | results.                                                       |     |
| 18 |                          |                     |                                                                |     |
| 19 |                          |                     |                                                                |     |
| 20 |                          |                     |                                                                |     |
| 21 |                          |                     |                                                                |     |
| 22 | <b>Other Information</b> |                     |                                                                |     |
| 23 |                          |                     |                                                                |     |
| 24 |                          |                     |                                                                |     |
| 25 | Funding                  | <a href="#">#22</a> | Give the source of funding and the role of the funders for the | 10  |
| 26 |                          |                     | present study and, if applicable, for the original study on    |     |
| 27 |                          |                     | which the present article is based                             |     |
| 28 |                          |                     |                                                                |     |
| 29 |                          |                     |                                                                |     |
| 30 |                          |                     |                                                                |     |
| 31 |                          |                     |                                                                |     |
| 32 |                          |                     |                                                                |     |

33 None The STROBE checklist is distributed under the terms of the Creative Commons Attribution  
34 License CC-BY. This checklist can be completed online using <https://www.goodreports.org/>, a tool  
35 made by the [EQUATOR Network](#) in collaboration with [Penelope.ai](#)  
36  
37  
38  
39  
40  
41  
42  
43  
44  
45  
46  
47  
48  
49  
50  
51  
52  
53  
54  
55  
56  
57  
58  
59  
60

# BMJ Open

## Demographic and Social Correlates and Indicators for Behavioural Compliance with Personal Protection Among Chinese Community-Dwellers During COVID-19: A Cross-sectional Study

|                                 |                                                                                                                                                                                                                                                                                                                                                                                                                                                                                                                                               |
|---------------------------------|-----------------------------------------------------------------------------------------------------------------------------------------------------------------------------------------------------------------------------------------------------------------------------------------------------------------------------------------------------------------------------------------------------------------------------------------------------------------------------------------------------------------------------------------------|
| Journal:                        | <i>BMJ Open</i>                                                                                                                                                                                                                                                                                                                                                                                                                                                                                                                               |
| Manuscript ID                   | bmjopen-2020-041453.R3                                                                                                                                                                                                                                                                                                                                                                                                                                                                                                                        |
| Article Type:                   | Original research                                                                                                                                                                                                                                                                                                                                                                                                                                                                                                                             |
| Date Submitted by the Author:   | 26-Nov-2020                                                                                                                                                                                                                                                                                                                                                                                                                                                                                                                                   |
| Complete List of Authors:       | Xu, Xin; Zhejiang University School of Public Health; National University Singapore Yong Loo Lin School of Medicine<br>Chew, Kimberly; National University Singapore Yong Loo Lin School of Medicine<br>Xu, Xiaolin; Zhejiang University School of Public Health<br>Wu, Zhihua; Zhejiang University School of Public Health<br>Xiao, Xiaohua; Zhejiang University School of Public Health<br>Yang, Qian; Zhejiang University School of Public Health; Zhejiang University School of Medicine Children's Hospital, Department of Endocrinology |
| <b>Primary Subject Heading</b>: | Public health                                                                                                                                                                                                                                                                                                                                                                                                                                                                                                                                 |
| Secondary Subject Heading:      | Infectious diseases, Global health                                                                                                                                                                                                                                                                                                                                                                                                                                                                                                            |
| Keywords:                       | Public health < INFECTIOUS DISEASES, Demography < TROPICAL MEDICINE, EPIDEMIOLOGY                                                                                                                                                                                                                                                                                                                                                                                                                                                             |
|                                 |                                                                                                                                                                                                                                                                                                                                                                                                                                                                                                                                               |

SCHOLARONE™  
Manuscripts



I, the Submitting Author has the right to grant and does grant on behalf of all authors of the Work (as defined in the below author licence), an exclusive licence and/or a non-exclusive licence for contributions from authors who are: i) UK Crown employees; ii) where BMJ has agreed a CC-BY licence shall apply, and/or iii) in accordance with the terms applicable for US Federal Government officers or employees acting as part of their official duties; on a worldwide, perpetual, irrevocable, royalty-free basis to BMJ Publishing Group Ltd ("BMJ") its licensees and where the relevant Journal is co-owned by BMJ to the co-owners of the Journal, to publish the Work in this journal and any other BMJ products and to exploit all rights, as set out in our [licence](#).

The Submitting Author accepts and understands that any supply made under these terms is made by BMJ to the Submitting Author unless you are acting as an employee on behalf of your employer or a postgraduate student of an affiliated institution which is paying any applicable article publishing charge ("APC") for Open Access articles. Where the Submitting Author wishes to make the Work available on an Open Access basis (and intends to pay the relevant APC), the terms of reuse of such Open Access shall be governed by a Creative Commons licence – details of these licences and which [Creative Commons](#) licence will apply to this Work are set out in our licence referred to above.

Other than as permitted in any relevant BMJ Author's Self Archiving Policies, I confirm this Work has not been accepted for publication elsewhere, is not being considered for publication elsewhere and does not duplicate material already published. I confirm all authors consent to publication of this Work and authorise the granting of this licence.

1  
2  
3 Demographic and Social Correlates and Indicators for Behavioural Compliance with Personal  
4 Protection Among Chinese Community-Dwellers During COVID-19: A Cross-sectional  
5  
6 Study  
7

8 **Xu Xin<sup>1,2</sup>, PhD, Kimberly Ann Chew<sup>2</sup>, BA (Hons), Xu Xiaolin (PhD)<sup>1</sup>, Wu Zhihua<sup>1</sup>, BA,**  
9 **Xiao Xiaohua<sup>1</sup>, BA, Yang Qian<sup>1,3\*</sup>, PhD**

10 *<sup>1</sup>School of Public Health & the 2<sup>nd</sup> Affiliated Hospital of School of Medicine, Zhejiang*  
11 *University, China*

12 *<sup>2</sup>Yong Loo Lin School of Medicine, National University of Singapore, Singapore*

13 *<sup>3</sup>Department of Endocrinology, the Children's Hospital, Zhejiang University School of*  
14 *Medicine, National Clinical Research Center for Child Health*

15  
16  
17  
18  
19  
20 Corresponding author:

21 Dr. Qian Yang

22  
23 1011 Administrative Building, Zijingang Campus, Zhejiang University, Hangzhou, China,  
24 310058, chianyoung@zju.edu.cn

25  
26 Abstract word count: 249 words

27  
28 Word count: 3075 words

29  
30 Number of figures & tables: 5

31  
32 Key words: COVID-19 coronavirus, behavioural compliance, social distancing, personal  
33 protective measures  
34  
35  
36  
37  
38  
39  
40  
41  
42  
43  
44  
45  
46  
47  
48  
49  
50  
51  
52  
53  
54  
55  
56  
57  
58  
59  
60

## ABSTRACT

### *Objectives:*

Examine compliance with personal protective measures in communities for the prevention and control of local transmission of the coronavirus (COVID-19), and explore indicators for such behavioural compliance.

### *Design:*

Cross-sectional design with a self-selecting sample. Data collected in February 2020.

### *Setting:*

Community dwellers in China.

### *Participants:*

2956 participants aged 16 and above completed the study and were included in the analysis.

### *Outcome measures:*

Nationwide COVID-19 survey. Demographics and self-reported compliance with four personal protective measures—home quarantine, mask-wearing, temperature-taking and hand-sanitising were collected. Outbreak severity and timeliness of personal protection order were obtained from the China Centre Disease Control (China CDC) website. Logistic regression models were employed to examine the association between demographic and social indicators and behavioural compliance.

### *Results:*

Compliance with home quarantine was only associated with gender (male, OR=0.61[0.51-0.73], inverse association) but no other indicators. In contrast, male had higher compliance with mask-wearing (OR=1.79[1.49-2.16]) and temperature taking (OR=1.27[1.05-1.53]). Compared to younger adults ( $\leq 20$  years), the middle-age groups (31-40 and 41-50 years of age) were more compliant with all protective behaviours, except for home quarantine (OR=0.71[0.54-0.93] and 0.67[0.46-0.97], respectively).

### *Conclusion:*

Male gender was associated with lower compliance with home quarantine yet higher compliance with mask-wearing and temperature-taking. The middle-age participants (31-50 years) had lower compliance with home quarantine but higher with other measures. These findings may be supported by the economic considerations and the long-inherited Confucian values among Chinese. In light of the ongoing COVID-19 pandemic, public health authorities should tailor policy implementation to disparities in psychosocial indicators.



### Strengths and limitations of this study

- Extensive data collected during the peak of the COVID-19 outbreak in China ( $n_{\text{completed}} = 2956$ ).
- Data was collected from multiple provinces with various levels of risk exposure to avoid bias in the sample (categorised using the number of confirmed cases reported by China CDC).
- The effect of other demographical variables (e.g., education, occupational status) was limited due to the lack of data.
- Survey was available online only, hence sample was limited to those with access to digital technology and Internet.
- More mental health-related questionnaires (e.g., depression, anxiety) should be collected and analysed as potential indicators for behavioural compliance.

### INTRODUCTION

In light of the coronavirus disease 2019 (COVID-19) outbreak that started in December 2019, the Chinese Government has taken a number of strict mitigation strategies to expedite the tracking, testing and treatment of COVID-19. To prevent and control the transmission of the virus in local communities, the aggressive social distancing order has been enforced nationwide in China as early as from January 25, 2020. Notably, prevention and control measures have been implemented in three phases: 1) suspension of intra-city and intercity transportation, and strict control of importation and exportation of COVID-19 cases from Wuhan and other provinces, 2) delaying the severity and rise in cases through several safety measures, 3) decreasing clusters, using standardised protocols and execution of “scientific evidence-based policy”. Examples of such measures include the closure of wet markets, contact tracing, temperature-taking, health declarations, quarantine, disallowing large gatherings, and implementation of strict travel restrictions.<sup>1 2</sup> Through strict compliance of Chinese citizens to the order, social distancing has been proven the most effective measure to ease the rapid spreading of the virus.<sup>3 4</sup>

Among all prevention and control measures, a nationwide movement restriction order was announced by the Chinese government soon after the lockdown of Wuhan city on January 23, 2020. This social distancing order was introduced and enforced subsequently, requiring all citizens to remain at home and avoid most forms of face-to-face social contact when outside.

1  
2  
3 The order was implemented with the recommendation of other personal protective  
4 measurements, such as regular hand sanitising, daily temperature-taking, and mask-wearing.<sup>5</sup>  
5  
6 The implementation of the personal protection order was challenging. Social distancing means  
7 staying away from mass gatherings and keeping a distance of 6 feet or 2 meters.<sup>3</sup> Due to the  
8 Chinese New Year celebration, which took place around the same time (January 25, 2020)  
9 when the outbreak happened, movements among cities and suburban areas, as well as family  
10 gatherings were inevitable and difficult to contain. Voluntary behavioural intervention during  
11 an infectious disease outbreak, such as social distancing, requires not only sufficient realisation  
12 of the situation severity, but more importantly, determined commitment to such action from  
13 individuals in the community.  
14  
15  
16  
17  
18  
19  
20  
21

22 Hence prior to the enforcement of the nationwide home quarantine order, the Chinese  
23 government announced a series of precautionary regulations, including 1) refusal of entry into  
24 public places without wearing a mask and obtaining a normal body temperature; 2) set-up of a  
25 detailed individual purchase record of fever/cough/flu-related medications in local pharmacies;  
26 3) screening and a detailed registry of suspected cases with high fever in the community. The  
27 entire enforcement was accompanied by thorough public health education and promotion  
28 which started as early as late January. Violation of the above-mentioned regulations could  
29 result in further investigation or even legal liability.<sup>6</sup>  
30  
31  
32  
33  
34  
35  
36  
37

38 After the implementation of the four personal protective behaviours, including home  
39 quarantine, mask-wearing, temperature-taking, and hand-sanitising, non-compliance would  
40 lead to strict education and immediate correction from various levels of management, ranging  
41 from the street and community, to district and city levels of local authority.  
42  
43  
44  
45

46 The implementation of these personal protective behaviours is necessary. However,  
47 compliance to these actions is not only determined by the severity of the disease, but also a  
48 number of demographic (e.g., gender, age) and social factors.<sup>7 8</sup> Interestingly, while previous  
49 literature have demonstrated that older people and females are typically more likely to practice  
50 protective behaviours in public health emergencies such as the severe acute respiratory  
51 syndrome (SARS) and H1N1 swine flu, the results are mixed.<sup>9 10</sup> Hence in the present study,  
52 we sought to understand the demographic indicators and correlates of individuals' compliance  
53 to preventive measures during COVID-19.  
54  
55  
56  
57  
58  
59  
60

## METHODS

### Study design and sampling

With a cross-sectional study design, a nationwide online survey on behavioural compliance during COVID-19 was carried out during February 14-17, 2020, among Chinese citizens in China. Community dwellers aged 16 and above were enrolled in the survey. To avoid bias in the sample, the study team disseminated the survey questionnaire nationwide in all 31 provinces and regions in China with different levels of risk exposure. Study description and questionnaires were posted through various social media platforms, such as Wechat and Weibo, with a notice and invitation on these platforms for better visibility. All participants from this self-selecting sample provided electronic informed consent prior to taking the survey (Supplemental Material 1). The study protocol was approved by the Ethics Commission of Zhejiang University prior to the commencement of the study and was in accordance with the Declaration of Helsinki. STROBE cross-sectional reporting guidelines were used.<sup>11</sup>

### Questionnaires

De-identified demographic information (age, gender, current living area) was collected.

*Outbreak Severity*: Severity of the outbreak in each province and region in all survey areas were sorted into 5 categories according to the confirmed coronavirus cases published on the China Center for Disease Control and Prevention (CDC) website on the day of the survey (February 14, 2020): <100 cases, 100-499 cases, 500-999 cases, 1000-1999 cases, >2000 cases.

*Policy Timeliness*: Timeliness of the social distancing order implemented by the provincial government was assessed by the length (in days) between the implementation date of the social distancing order to the date of the survey. For those areas where the order was implemented after the survey, the score "0" was granted, e.g. Nei Meng province. Scores were subsequently transformed into fractional rank for analysis purposes.

### Compliance to Mitigation Measures

An individual's compliance with a number of mitigation measures introduced by the local government was defined as:

1. home quarantine, as defined by leaving residential address for  $\leq 1$  in 3 days' time, as per the Chinese government's regulation;
2. mask-wearing, as defined by wearing a mask when leaving the residential address on the day of the survey, as per the Chinese government's regulation;
3. temperature-taking, as defined by taking one's own temperature at least once on the day of the survey, as per the Chinese government's regulation;
4. hand-sanitising, as defined by sanitising one's hands with a sanitiser with >75% alcohol

on the day of the survey, as per the Chinese government's regulation.

### Statistical Analysis

Associations among 4 individual protective behaviours were examined using Chi-square. Logistic regression models were applied to investigate the indicators for accordance with each individual mitigation measure. All analyses were performed using SPSS version 25 and SAS version 9.4. Statistical significance was determined as two-tailed p-value < 0.05. Bonferroni correction was employed to obtain an adjusted significance level for each protective behaviour:  $\approx 0.05/4=0.0125$ .

### Patient and Public Involvement

No patients and none of the public were involved in the study planning, design and interpretation of results. Results from the paper will be disseminated to the general public through online article format.

## RESULTS

A total of 3,000 participants completed the survey, among whom, 7 had incomplete data and 37 had repeated answers and were removed from the dataset, leaving a total of 2,956 in the current analysis. All 2,956 subjects completed all questionnaires in the survey. Sample descriptives are in Table 1.

Table 1. Study sample descriptives

|                                                                         | Whole Sample | Range |
|-------------------------------------------------------------------------|--------------|-------|
| <i>Demographics</i>                                                     |              |       |
| Age (mean±SD)                                                           | 28.5±8.6     | 16-72 |
| Gender, female, n (%)                                                   | 1178 (39.9%) |       |
| Current Living Area, n (%)                                              |              |       |
| Extremely High Risk (≥2000 confirmed cases)                             | 106 (3.5%)   |       |
| High Risk (1000-1999 confirmed cases)                                   | 667 (22.2%)  |       |
| Moderate-High Risk (500-599 confirmed cases)                            | 770 (25.7%)  |       |
| Moderate Risk (100-499 confirmed cases)                                 | 1290 (43.0%) |       |
| Mild-Moderate Risk (<100 confirmed cases)                               | 167 (5.6%)   |       |
| Average length of implementation of mitigation measures, days (mean±SD) | 15±5.1       | 0-20  |
| <i>Compliance to Mitigation Measures</i>                                |              |       |
| Home Quarantine, compliant, n (%)                                       | 2234 (75.6%) |       |
| Mask-wearing, compliant, n (%)                                          | 2353 (79.6%) |       |
| Temperature-taking, compliant, n (%)                                    | 2350 (79.5%) |       |

|                                   |              |
|-----------------------------------|--------------|
| Hand-sanitising, compliant, n (%) | 2257 (76.4%) |
|-----------------------------------|--------------|

### Compliance with individual protective measures

Compliance with home quarantine was positively associated with compliance with hand-sanitising ( $\chi^2=4.21$ ,  $p=0.023$ ), but not with mask-wearing and temperature-taking ( $p=0.07$  and  $0.08$  in the positive direction, respectively). Compliance with mask-wearing was positively associated with temperature-taking ( $\chi^2=493.11$ ,  $p<0.001$ ) and hand-sanitising ( $\chi^2=498.55$ ,  $p<0.001$ ). Compliance with temperature-taking was positively associated with hand-sanitising ( $\chi^2=802.16$ ,  $p<0.001$ ).

Logistic regression analysis was employed to investigate the predictors for compliance with each mitigation measure: home quarantine, mask-wearing, temperature-taking and hand-sanitising. Results showed that higher risk-exposure was positively associated with compliance with all measures except home quarantine. Age was positively associated with higher compliance with masking-wearing and hand-sanitising ( $p<0.0125$ ), yet inversely associated with home quarantine. Interestingly, whilst the male gender was associated with lower compliance with home quarantine order, it was found positively associated with mask-wearing and temperature-taking behaviours (Table 2).

Table 2. Indicators for compliance with respective mitigation measures

|                                      | Compliance vs. Non. Compliance<br>OR (95%CI) |
|--------------------------------------|----------------------------------------------|
| <i>Home Quarantine</i>               |                                              |
| <b>Gender, Male</b>                  | <b>0.61 (0.51-0.73)</b>                      |
| Age                                  | 0.99 (0.98-0.999)*                           |
| Regional Risk-exposure               | 0.99 (0.90-1.08)                             |
| Timeliness for Policy Implementation | 1.003 (0.99-1.02)                            |
| <i>Mask-Wearing</i>                  |                                              |
| <b>Gender, Male</b>                  | <b>1.79 (1.49-2.16)</b>                      |
| <b>Age</b>                           | <b>1.03 (1.02-1.04)</b>                      |
| <b>Regional Risk-exposure</b>        | <b>1.41 (1.28-1.54)</b>                      |
| Timeliness for Policy Implementation | 0.99 (0.98-1.01)                             |
| <i>Temperature-taking</i>            |                                              |
| <b>Gender, Male</b>                  | <b>1.27 (1.05-1.53)</b>                      |
| Age                                  | 1.005 (0.995-1.02)                           |
| <b>Regional Risk-exposure</b>        | <b>1.40 (1.28-1.54)</b>                      |
| Timeliness for Policy Implementation | 1.016 (0.998 -1.035)                         |
| <i>Hand-sanitising</i>               |                                              |

|                                      |                         |
|--------------------------------------|-------------------------|
| Gender, Male                         | 1.14 (0.95-1.36)        |
| <b>Age</b>                           | <b>1.02 (1.01-1.04)</b> |
| <b>Regional Risk-exposure</b>        | <b>1.39 (1.27-1.52)</b> |
| Timeliness for Policy Implementation | 1.01 (0.995-1.03)       |

**Boldface indicates significance,  $p < 0.0125$**

\*. *Trend to significance ( $0.0125 < p < 0.05$ )*

Gender-specific compliance with each personal protective measure is presented in Figure 1.

Whilst males were less prone to be compliant with home quarantine order, they were more likely to abide by the other 3 personal protective measures.

Interestingly, from the distribution graph, the mid-age groups (31-40 and 41-50) was the most non-compliant age group for home quarantine order, nevertheless also the most compliant for other protective behaviours (Figure 2).

Further analysis showed that, the 31-40 age group was less compliant to the home quarantine order (OR=0.71 [0.54-0.93]), compared to the reference group ( $\leq 20$ ; Figure 3). Yet they were compliant to mask-wearing (OR=1.96, 95%CI=1.46-2.64), hand-sanitising (OR=2.24, 95% CI=1.70-2.96), and temperature-taking (OR=1.65, 95% CI=1.23-2.21). A similar pattern for compliance was also observed in the 41-50 age group, where they were less compliant to home quarantine (OR=0.67 [0.46-0.97]), nonetheless more compliant to mask-wearing (OR=1.88[1.24-2.87]) and hand-sanitising (OR=1.51[1.03-2.19]). See Supplemental Material 2 for complete regression model output.

## DISCUSSION

To our knowledge, the present study is amongst the first to examine demographic and social indicators and correlates of the general public's compliance to personal protective measures during the COVID-19 outbreak in China. The main findings from the present study is that among all demographic and social factors, age, gender and risk of exposure are the three main indicators for behavioural compliance to the protective measures.

Among all of the mitigation measures various countries have implemented during COVID-19, social distancing has been the most emphasised measure, and proven the most effective one.<sup>12</sup> China introduced the strict social distancing order in February when the epidemic was



1  
2  
3 spreading at an alarming rate and causing an increasing number of deaths in the nation.<sup>5</sup> The  
4 execution of such an order was combined with home quarantine, the shutdown of all public  
5 places, including shops, malls, restaurants and entertainment venues, and forbidding of mass  
6 gatherings. With such a rigorous combination, the domestic and global spreading speed of the  
7 virus showed a significant slowdown from mid-February till mid-March.<sup>13</sup>  
8  
9

10  
11  
12  
13 In the present study, males were found less likely to be compliant with the social-distancing  
14 order (72% vs. 74%), nevertheless more likely to follow other personal protective approaches,  
15 such as mask-wearing (83% vs. 74%), temperature-taking (81% vs. 77%), and hand-sanitising  
16 (77% vs. 75%). One plausible explanation for the gender difference in the behavioural  
17 compliance is that males, especially in the mid-age group, are identified to be the pillar of the  
18 family. Hence during a public health emergency like COVID-19, males are more expected to  
19 carry on with family errands and even go to work. In the present study, 87 reported violation  
20 of the home quarantine order. Among whom, 60 went out for shopping/collection of essential  
21 goods (home supplies and grocery), with 67% of them being male. Apart from this, 24 reported  
22 to have left home for work purposes, among whom 67% were male. Our findings support  
23 previous literature that reported males were more likely to leave their homes during the early  
24 stages of the COVID-19 outbreak in the Hubei Province and other parts of China.<sup>8</sup> Interestingly,  
25 recent studies investigating behavioural compliance to safety measures (including mask-  
26 wearing, isolation) outside of China during COVID-19 have mixed results.<sup>14-18</sup> Nonetheless,  
27 explanations for non-compliance to safety measures centres around the level of knowledge and  
28 perception of the COVID-19 pandemic. Similarly, past pandemic research have shown that  
29 females are more likely to adhere to more avoidant behaviors such as hand washing and  
30 wearing masks.<sup>8-10</sup> <sup>19</sup> Conversely, we found that males are more likely to comply with these  
31 avoidance behaviours apart from social distancing. Our findings thus demonstrate that the  
32 impact of economic conditions alongside the desire to remain safe may be the predominant  
33 drivers for the disparities in behavioural compliance. However, behind such a potential driving  
34 force lies cultural expectations that adult males are subjected to in Chinese society. From a  
35 cultural standpoint, the male breadwinner model still exists in China's social fabric today  
36 despite the increasingly blurred gender roles in modern-day China.<sup>20</sup> The over 2000-year old  
37 Confucian model posits a gender role divide between males and females where males undertake  
38 an 'outside' role and are expected to provide for the family, while females take on the  
39 caregiving role ('inside' role) to tend to household matters.<sup>21-24</sup> A strong emphasis is also  
40 placed on filial piety, where providing and caring for one's elderly parents is an esteemed and  
41  
42  
43  
44  
45  
46  
47  
48  
49  
50  
51  
52  
53  
54  
55  
56  
57  
58  
59  
60

1  
2  
3 obligatory duty.<sup>25</sup> As a result, the conformity to role expectations in Chinese society may  
4 explain the non-compliance by males to social distancing measures as they feel more obligated  
5 to meet their economic responsibilities to continue providing for the family, even during a  
6 public health crisis. Our results challenge several work on COVID-19 preventive behaviours  
7 that view behavioural compliance singularly as the result of partisanship, perceptions  
8 surrounding its effectiveness and the infection risks.<sup>17,26</sup> Our study lends some support to Zhong  
9 and colleagues' findings that males were more likely to leave the house to go to crowded places  
10 during the outbreak in China,<sup>8</sup> but contradict in mask-wearing compliance. Higher likelihood  
11 of risk-taking behaviour in males was noted as an explanation for their non-compliance. On  
12 the contrary, we found that males were compliant to other preventive measures to mitigate risk.  
13 Notably, Zhong and colleagues gathered their data between January 27 and February 1 2020,<sup>8</sup>  
14 a week after the lockdown in China, three weeks earlier than when our data were collected.  
15 Therefore, strict restrictions and public health education by authorities during the three weeks  
16 may have been effective and enabled males to engage in more preventive measures even though  
17 they were still leaving home for work.

18  
19 Nevertheless, timeliness of policy implementation at provincial level did not have a significant  
20 impact on behavioural compliance in the present study. A plausible explanation could be that  
21 policy implementation was launched in a prompt manner, according to the outbreak spreading  
22 speed in each province. It is worth noting that most provinces announced and implemented the  
23 COVID policy within 15 days since the lockdown of Wuhan city.<sup>1</sup> Such equally speedy  
24 reaction at the governmental level may be the reason why there was no difference of policy  
25 implementation on personal protective behaviours among community dwellers in China.

26  
27  
28  
29  
30  
31  
32  
33  
34  
35  
36  
37  
38  
39  
40  
41  
42  
43  
44  
45  
46  
47  
48  
49  
50  
51  
52  
53  
54  
55  
56  
57  
58  
59  
60  
61  
62  
63  
64  
65  
66  
67  
68  
69  
70  
71  
72  
73  
74  
75  
76  
77  
78  
79  
80  
81  
82  
83  
84  
85  
86  
87  
88  
89  
90  
91  
92  
93  
94  
95  
96  
97  
98  
99  
100  
101  
102  
103  
104  
105  
106  
107  
108  
109  
110  
111  
112  
113  
114  
115  
116  
117  
118  
119  
120  
121  
122  
123  
124  
125  
126  
127  
128  
129  
130  
131  
132  
133  
134  
135  
136  
137  
138  
139  
140  
141  
142  
143  
144  
145  
146  
147  
148  
149  
150  
151  
152  
153  
154  
155  
156  
157  
158  
159  
160  
161  
162  
163  
164  
165  
166  
167  
168  
169  
170  
171  
172  
173  
174  
175  
176  
177  
178  
179  
180  
181  
182  
183  
184  
185  
186  
187  
188  
189  
190  
191  
192  
193  
194  
195  
196  
197  
198  
199  
200  
201  
202  
203  
204  
205  
206  
207  
208  
209  
210  
211  
212  
213  
214  
215  
216  
217  
218  
219  
220  
221  
222  
223  
224  
225  
226  
227  
228  
229  
230  
231  
232  
233  
234  
235  
236  
237  
238  
239  
240  
241  
242  
243  
244  
245  
246  
247  
248  
249  
250  
251  
252  
253  
254  
255  
256  
257  
258  
259  
260  
261  
262  
263  
264  
265  
266  
267  
268  
269  
270  
271  
272  
273  
274  
275  
276  
277  
278  
279  
280  
281  
282  
283  
284  
285  
286  
287  
288  
289  
290  
291  
292  
293  
294  
295  
296  
297  
298  
299  
300  
301  
302  
303  
304  
305  
306  
307  
308  
309  
310  
311  
312  
313  
314  
315  
316  
317  
318  
319  
320  
321  
322  
323  
324  
325  
326  
327  
328  
329  
330  
331  
332  
333  
334  
335  
336  
337  
338  
339  
340  
341  
342  
343  
344  
345  
346  
347  
348  
349  
350  
351  
352  
353  
354  
355  
356  
357  
358  
359  
360  
361  
362  
363  
364  
365  
366  
367  
368  
369  
370  
371  
372  
373  
374  
375  
376  
377  
378  
379  
380  
381  
382  
383  
384  
385  
386  
387  
388  
389  
390  
391  
392  
393  
394  
395  
396  
397  
398  
399  
400  
401  
402  
403  
404  
405  
406  
407  
408  
409  
410  
411  
412  
413  
414  
415  
416  
417  
418  
419  
420  
421  
422  
423  
424  
425  
426  
427  
428  
429  
430  
431  
432  
433  
434  
435  
436  
437  
438  
439  
440  
441  
442  
443  
444  
445  
446  
447  
448  
449  
450  
451  
452  
453  
454  
455  
456  
457  
458  
459  
460  
461  
462  
463  
464  
465  
466  
467  
468  
469  
470  
471  
472  
473  
474  
475  
476  
477  
478  
479  
480  
481  
482  
483  
484  
485  
486  
487  
488  
489  
490  
491  
492  
493  
494  
495  
496  
497  
498  
499  
500  
501  
502  
503  
504  
505  
506  
507  
508  
509  
510  
511  
512  
513  
514  
515  
516  
517  
518  
519  
520  
521  
522  
523  
524  
525  
526  
527  
528  
529  
530  
531  
532  
533  
534  
535  
536  
537  
538  
539  
540  
541  
542  
543  
544  
545  
546  
547  
548  
549  
550  
551  
552  
553  
554  
555  
556  
557  
558  
559  
560  
561  
562  
563  
564  
565  
566  
567  
568  
569  
570  
571  
572  
573  
574  
575  
576  
577  
578  
579  
580  
581  
582  
583  
584  
585  
586  
587  
588  
589  
590  
591  
592  
593  
594  
595  
596  
597  
598  
599  
600  
601  
602  
603  
604  
605  
606  
607  
608  
609  
610  
611  
612  
613  
614  
615  
616  
617  
618  
619  
620  
621  
622  
623  
624  
625  
626  
627  
628  
629  
630  
631  
632  
633  
634  
635  
636  
637  
638  
639  
640  
641  
642  
643  
644  
645  
646  
647  
648  
649  
650  
651  
652  
653  
654  
655  
656  
657  
658  
659  
660  
661  
662  
663  
664  
665  
666  
667  
668  
669  
670  
671  
672  
673  
674  
675  
676  
677  
678  
679  
680  
681  
682  
683  
684  
685  
686  
687  
688  
689  
690  
691  
692  
693  
694  
695  
696  
697  
698  
699  
700  
701  
702  
703  
704  
705  
706  
707  
708  
709  
710  
711  
712  
713  
714  
715  
716  
717  
718  
719  
720  
721  
722  
723  
724  
725  
726  
727  
728  
729  
730  
731  
732  
733  
734  
735  
736  
737  
738  
739  
740  
741  
742  
743  
744  
745  
746  
747  
748  
749  
750  
751  
752  
753  
754  
755  
756  
757  
758  
759  
760  
761  
762  
763  
764  
765  
766  
767  
768  
769  
770  
771  
772  
773  
774  
775  
776  
777  
778  
779  
780  
781  
782  
783  
784  
785  
786  
787  
788  
789  
790  
791  
792  
793  
794  
795  
796  
797  
798  
799  
800  
801  
802  
803  
804  
805  
806  
807  
808  
809  
810  
811  
812  
813  
814  
815  
816  
817  
818  
819  
820  
821  
822  
823  
824  
825  
826  
827  
828  
829  
830  
831  
832  
833  
834  
835  
836  
837  
838  
839  
840  
841  
842  
843  
844  
845  
846  
847  
848  
849  
850  
851  
852  
853  
854  
855  
856  
857  
858  
859  
860  
861  
862  
863  
864  
865  
866  
867  
868  
869  
870  
871  
872  
873  
874  
875  
876  
877  
878  
879  
880  
881  
882  
883  
884  
885  
886  
887  
888  
889  
890  
891  
892  
893  
894  
895  
896  
897  
898  
899  
900  
901  
902  
903  
904  
905  
906  
907  
908  
909  
910  
911  
912  
913  
914  
915  
916  
917  
918  
919  
920  
921  
922  
923  
924  
925  
926  
927  
928  
929  
930  
931  
932  
933  
934  
935  
936  
937  
938  
939  
940  
941  
942  
943  
944  
945  
946  
947  
948  
949  
950  
951  
952  
953  
954  
955  
956  
957  
958  
959  
960  
961  
962  
963  
964  
965  
966  
967  
968  
969  
970  
971  
972  
973  
974  
975  
976  
977  
978  
979  
980  
981  
982  
983  
984  
985  
986  
987  
988  
989  
990  
991  
992  
993  
994  
995  
996  
997  
998  
999  
1000

Though gender played an important role in predicting compliance with home quarantine in people aged 21 years old and above, it did not make a difference in people under 21 years old. Studies have shown that late adolescents tend not to comply with social distancing and stay home orders due to their likelihood in engaging in risky behaviors.<sup>8, 27</sup> However, our study found that people in the mid-age group, especially those between 31-40 and 41-50 years old (Figure 2) were driving this significance of lower compliance with home quarantine order, as compared to younger adults <21 years of age. Notably, those above 50 years old had a higher likelihood of staying home similar to those below 21. A plausible explanation for the reduced social distancing compliance in the 31-50 age group is that a large number of these people may be salarymen and have to leave home for work. On the other hand, those above 50 may be aware of the risks involved and have fewer reasons to leave the house. Furthermore, people in



1  
2  
3 the >50 age group may have reduced mobility function.<sup>28</sup> Hence, those between 31 to 50 years  
4 old have lesser compliance to home quarantine due to economic reasons where they have to go  
5 out to work compared to those under 21 where majority of them were likely to be high school  
6 or university students, hence could not access campus due to temporary shutdown of all schools  
7 nationwide during the epidemic.<sup>29</sup>  
8  
9

10  
11  
12  
13 The present study has several strengths and weaknesses. To our knowledge, the present study  
14 is amongst the first to examine the effect of demographical and social correlates on the  
15 compliance of public health mitigation measures, especially social distancing, during the  
16 COVID-19 outbreak. Furthermore, the study was conducted during the peak of the spread of  
17 COVID-19 in China and gathered nationwide data from participants in China. Therefore, the  
18 findings obtained are especially vital in understanding the motivations behind the lack of  
19 compliance with mitigation measures, particularly during the heightened period of the outbreak.  
20 We observed a difference in adherence to safety measures (e.g., mask-wearing) by males  
21 between two timeframes of the pandemic in China<sup>8</sup>, suggesting that public health education  
22 and strict restrictions may have impacted the public's perception and compliance. Hence, these  
23 results help further inform public health authorities and political leaders in the way they  
24 implement mitigation measures and administer financial and psychological aid to the  
25 community. Notably, the present study lacked important demographic factors such as education  
26 level and occupational status, which could have further informed future mitigation measures.  
27 A non-probability sample was used in this study, thus rendering the effect of p-values and  
28 confidence intervals not strictly valid, or valid only under the assumption that the sample is  
29 comparable to a random sample. The study's outcome variables were also self-reported  
30 compliance instead of actual compliance, suggesting the potential impact of social desirability  
31 bias in under- or over-reporting compliance to safety measures.<sup>30</sup> However, the online mode of  
32 data collection and the anonymity of the survey may have mitigated such potential biases.  
33 Moreover, as the study was conducted through an online survey, the sample was limited to  
34 those with access to digital technology and Internet. Therefore, we were unable to determine if  
35 this subset of the population complied to mitigation measures as well as the factors associated  
36 with it. Information obtained from this subset is essential as they may be more vulnerable to  
37 the virus due to lack of access to extensive public health awareness and mitigation measures  
38 online. While the lack of access to digital technology is a real limitation, future studies should  
39 attempt to reach out to this subset of the population. Retrospective studies could be conducted  
40 to assess their accordance with mitigation measures, specifically social distancing, and the role  
41  
42  
43  
44  
45  
46  
47  
48  
49  
50  
51  
52  
53  
54  
55  
56  
57  
58  
59  
60

1  
2  
3 of psychosocial indicators and correlates on the compliance. Additionally, it would be  
4 interesting to examine the anxiety levels of those in the under 21 group that had a significant  
5 impact on their compliance with social distancing during the outbreak. Access to social media  
6 and overwhelming information provided by the media every day could be a factor that fuelled  
7 the heightened levels of anxiety.  
8  
9

10  
11  
12  
13 The non-compliance with public health mitigation measures, particularly home quarantine, was  
14 largely attributed to the male gender, and being in the middle-aged group. Our study found that  
15 while males in the mid-age group were least compliant with social distancing, they were most  
16 compliant to other measures (i.e., mask-wearing, hand-sanitising, and temperature-taking),  
17 possibly due to their economic responsibilities and need to fulfil the breadwinner role  
18 expectation. As the COVID-19 outbreak is still ongoing, public health authorities and  
19 governments could target this population in their future measures and aid that are provided  
20 during this pandemic.  
21  
22  
23  
24  
25  
26  
27  
28

### 29 **Figure Legends:**

30 Figure 1. Gender-specific percentages for behavioural compliance

31 Figure 2. Age-specific percentages for compliance with individual protective behaviours

32 Figure 3. Adjusted ORs and 95% CI of different age-blocks for compliance with individual  
33 protective behaviours. Analysis controlled for gender, days to policy implementation and risk  
34 exposure  
35  
36  
37  
38  
39  
40

41 *Acknowledgements:* The authors would like to acknowledge all study participants for their  
42 cooperation.  
43

44 *Contributors:* XX\* and YQ conceptualized and designed the study. XX\* drafted the  
45 manuscript. YQ supervised data analysis and interpretation of data. XX\*, WZ and XXH  
46 acquired the data. XX\* and KAC analyzed and interpreted the data. XX, WZ and XXH revised  
47 the manuscript for intellectual content. YQ and KAC critically revised the manuscript for  
48 intellectual content.  
49  
50  
51  
52

53 \*Xu Xin

54 *Disclaimer:* The funders had no role in study design, data analysis and interpretation, and  
55 writing of the manuscript.  
56  
57

58 *Funding:* This study is supported by the National Natural Science Foundation of China  
59 (71974170), Soft Science Project of Science Technology Department of Zhejiang Province of  
60

1  
2  
3 China (2019C35025) and Youth Project of the Center for Health Policy and Hospital  
4 Management of Zhejiang University (2019WSZ007).

5  
6 *Competing interests:* None declared.

7  
8 *Patient consent for publication:* Not required.

9  
10 *Ethics approval:* This study has been approved by the Ethics Commission of Zhejiang  
11 University (ID: ZGL202005-01). Informed consent was obtained from participants prior to  
12 taking part in the study.  
13

14  
15 *Data availability statement:* Data are available upon request. Original data can be requested  
16 from the study team ([xuxinsummer@zju.edu.cn](mailto:xuxinsummer@zju.edu.cn) and [chianyoung@zju.edu.cn](mailto:chianyoung@zju.edu.cn)).  
17  
18  
19  
20  
21  
22  
23  
24  
25  
26  
27  
28  
29  
30  
31  
32  
33  
34  
35  
36  
37  
38  
39  
40  
41  
42  
43  
44  
45  
46  
47  
48  
49  
50  
51  
52  
53  
54  
55  
56  
57  
58  
59  
60

**REFERENCES**

1. WHO-China Joint Mission. Report of the WHO-China Joint Mission on Coronavirus Disease 2019 (COVID-19): World Health Organization, 2020.
2. General Office of the People's Government of Hubei Province. Announcement of the People's Government of Hubei Province on Strengthening the Prevention and Control of Pneumonia Caused by New Coronavirus Infection. 2020a. Retrieved from [http://www.hubei.gov.cn/xxgk/gsgg/202001/t20200122\\_2013895.shtml](http://www.hubei.gov.cn/xxgk/gsgg/202001/t20200122_2013895.shtml)
3. World Health Organisation. Coronavirus disease (COVID-19) advice for the public. 2020
4. Zhang Y, Jiang B, Yuan J, et al. The impact of social distancing and epicenter lockdown on the COVID-19 epidemic in mainland China: A data-driven SEIQR model study. 2020 doi: 10.1101/2020.03.04.20031187
5. China Centre for Disease Control and Prevention. 新型冠状病毒肺炎 个人防护怎么做. China, 2020.
6. General Office of the People's Government of Hubei Province. Interim Measures for the Prevention and Control of Pneumonia Outbreak of Novel Coronavirus Infection in Wuhan. 2020b. Retrieved from [http://www.hubei.gov.cn/zhuanti/2020/gzxxgzbd/zxtb/202001/t20200130\\_2016578.shtml](http://www.hubei.gov.cn/zhuanti/2020/gzxxgzbd/zxtb/202001/t20200130_2016578.shtml)
7. Leung GM, Lam, T-H, Ho, L-M, et al. The impact of community psychological responses on outbreak control for severe acute respiratory syndrome in Hong Kong. *J Epidemiol Community Health* 2003;57(11):857-63. doi: 10.1136/jech.57.11.857
8. Zhong BL, Luo W, Li HM, et al. Knowledge, attitudes, and practices towards COVID-19 among Chinese residents during the rapid rise period of the COVID-19 outbreak: a quick online cross-sectional survey. *Int J Biol Sci* 2020;16(10):1745-52. doi: 10.7150/ijbs.45221 [published Online First: 2020/04/01]
9. Moran KR, Del Valle SY. A Meta-Analysis of the Association between Gender and Protective Behaviors in Response to Respiratory Epidemics and Pandemics. *PLoS One* 2016;11(10):e0164541. doi: 10.1371/journal.pone.0164541 [published Online First: 2016/10/22]
10. Bish A, Michie S. Demographic and attitudinal determinants of protective behaviours during a pandemic: A review. *Br. J. Health Psychol.* 2010;15:797-824. doi: 10.1348/135910710X485826
11. von Elm E, Altman, DG, Egger, M et al. The Strengthening the Reporting of Observational

- 1  
2  
3 Studies in Epidemiology (STROBE) Statement: Guidelines for Reporting  
4 Observational Studies. *Epidemiology* 2007;18(6):800-04. doi:  
5 10.1097/EDE.0b013e3181577654  
6  
7  
8  
9 12. Kakodkar P, Kaka N, Baig MN. A Comprehensive Literature Review on the Clinical  
10 Presentation, and Management of the Pandemic Coronavirus Disease 2019 (COVID-  
11 19). *Cureus* 2020;12(4):e7560. doi: 10.7759/cureus.7560 [published Online First:  
12 2020/04/10]  
13  
14  
15 13. Hao K. China's travel lockdown sharply slowed the global spread of Covid-19. MIT  
16 Technology Review, 2020.  
17  
18 14. Afzal M, Khan, A, Qureshi, UUR et al. Community-Based Assessment of Knowledge,  
19 Attitude, Practices and Risk Factors Regarding COVID-19 Among Pakistanis  
20 Residents During a Recent Outbreak: A Cross-Sectional Survey. *J. Community Health*  
21 2020;13:1-11. doi: 10.1007/s10900-020-00875-z  
22  
23  
24  
25 15. Meier K, Glatz, T, Guijt, MC, et al. COVID-19 Survey Study Group. Public perspectives  
26 on protective measures during the COVID-19 pandemic in the Netherlands, Germany  
27 and Italy: A survey study. *PLoS One* 2020;15:1-17. doi: 10.1371/journal.  
28 pone.0236917  
29  
30  
31  
32 16. Mansuri F, Zalat, MM, Khan, AA, et al. Estimating the public response to mitigation  
33 measures and selfperceived behaviours towards the COVID-19 pandemic. *Taibah Univ.*  
34 *Med. Sci.* 2020;July 4:1-6. doi: 10.1016/j.jtumed.2020.06.003  
35  
36  
37 17. de Bruine WB, D. Relationships Between Initial COVID-19 Risk Perceptions and  
38 Protective Health Behaviors: A National Survey. *Am. J. Prev. Med.* 2020;59(2):157-  
39 67. doi: 10.1016/j.amepre.2020.05.001  
40  
41  
42  
43 18. Honarvar B, Lankarani, KB, Kharmandar, A, et al. Knowledge, attitudes, risk perceptions,  
44 and practices of adults toward COVID-19: a population and field-based study from Iran.  
45 *Int. J. Public Health* 2020;Jun 24:1-9. doi: 10.1007/s00038-020-01406-2  
46  
47  
48 19. de la Vega R, Barquin, R. R., Boros, S., et al. Could Attitudes Toward COVID-19 in Spain  
49 Render Men More Vulnerable Than Women? 2020, April 2 doi: 10.31234/osf.io/dyxqn.  
50  
51  
52 20. Attane' I. Being a Woman in China Today: A Demography of Gender. *China Perspectives*  
53 2012;4:5-15.  
54  
55 21. Lebra TS. Confucian gender role and personal fulfillment for Japanese women. Albany,  
56 NY: State University of New York Press. 1998:209–227.  
57  
58 22. Qian Y, Qian Z. Work, Family, and Gendered Happiness Among Married People in Urban  
59 China. *Soc. Indic. Res.* 2014;121(1):61-74. doi: 10.1007/s11205-014-0623-9  
60

- 1  
2  
3 23. Zuo J. From Revolutionary Comrades to Gendered Partners: Marital Construction of  
4 Breadwinning in Post-Mao Urban China. *J. Fam. Issues* 2003;24:314-37. doi:  
5 10.1177/0192513X02250888  
6  
7  
8 24. W-M T. Confucius and Confucianism. In: Vos WHSGAD, ed. *Confucianism and the*  
9 *Family*. Albany, New York: State University of New York Press 1998:3-36.  
10  
11 25. Stafford C. *The roads of Chinese childhood: Learning and Identification in Angang*.  
12 Cambridge, UK: Cambridge University Press 1995.  
13  
14 26. Clements J. *Knowledge and Behaviors Toward COVID-19 Among US Residents During*  
15 *the Early Days of the Pandemic: Cross-Sectional Online Questionnaire*. *JMIR Public*  
16 *Health & Surveillance* 2020;6:e19161. doi: 10.2196/19161  
17  
18 27. Duell N, Steinberg, L, Icenogle, G, et al. Age Patterns in Risk Taking Across the World. *J*  
19 *Youth Adolescence* 2018;47:1052–72. doi: 10.1007/s10964-017-0752-y  
20  
21 28. Gardener E, Huppert, FA, Guralnik, JM et al. Middle-Aged and Mobility-Limited:  
22 Prevalence of Disability and Symptom Attributions in a National Survey. *J Gen Intern*  
23 *Med* 2006;21(10):1091–96. doi: 10.1111/j.1525-1497.2006.00564.x  
24  
25 29. Zhu Q. Why did China close all schools? *China Daily* 2020.  
26  
27 30. Nederhof A. Methods of coping with social desirability bias: A review. *Eur. J. Soc. Psychol.*  
28 1985;15(3):263-80. doi: 10.1002/ejsp.2420150303  
29  
30  
31  
32  
33  
34  
35  
36  
37  
38  
39  
40  
41  
42  
43  
44  
45  
46  
47  
48  
49  
50  
51  
52  
53  
54  
55  
56  
57  
58  
59  
60

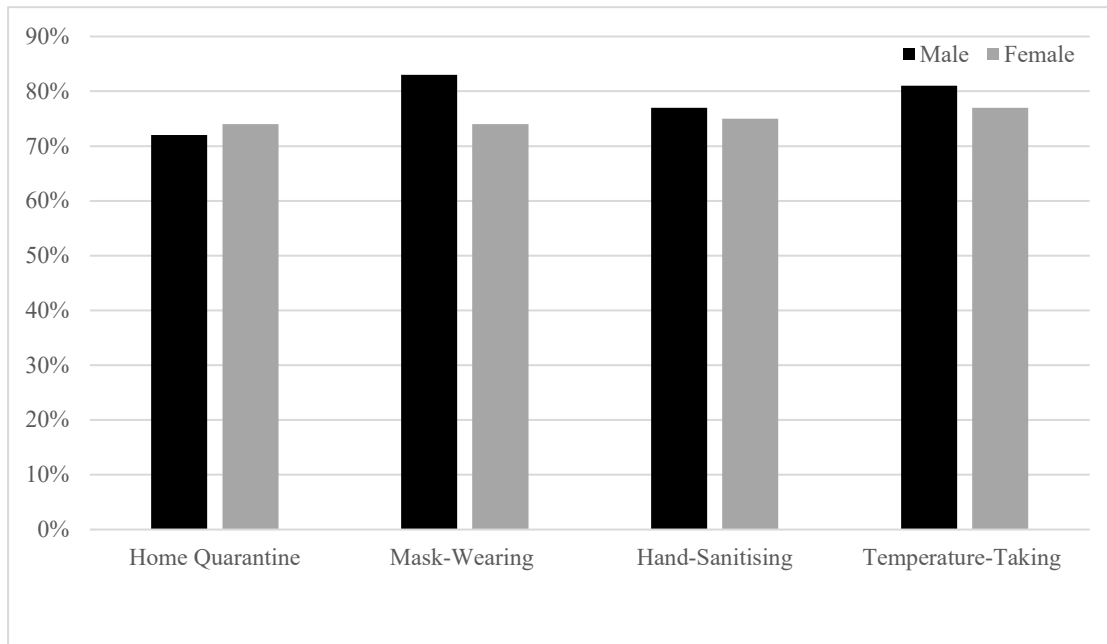

Figure 1. Gender-specific percentages for behavioural compliance

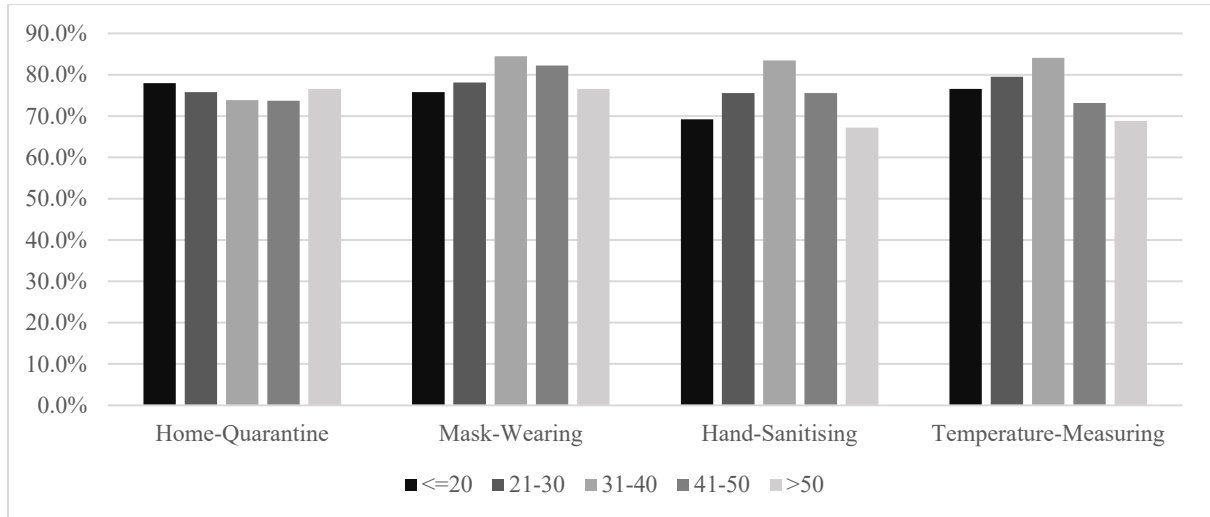

Figure 2. Age-specific distribution for compliance with individual protective behaviours





Figure 3. Adjusted ORs and 95% CI of different age-blocks for compliance with individual protective behaviours. Analysis controlled for gender, days to policy implementation and risk exposure.

## Supplemental Material 1

### 中国社区居民在 COVID-19 期间个人保护行为的调查

你好！这里是浙江大学公共卫生学院发起的新冠疫情调研组。新冠肺炎的肆虐给人民健康带来了极大的威胁。但是我们定会众志成城，共同战“疫”！我们在此诚挚邀请您参加本次调研，您的参与将会帮助我们更好地了解民众个人保护行为。

本次调研将会分两次进行。我们会邀请您参与多次答题。本次问卷大约需要 1-2 分钟完成。请仔细阅读清楚问题之后填写。每次提交问卷后，经过系统核查，第一次问卷您将得到 3 元红包，第二次问卷您将得到 5 元红包。感谢您一如既往的支持和参与，让我们上下一心，携手并进，共同抗击新冠病毒！

本问卷不涉及您的任何隐私。您的所有答案将严格保密，仅用于疫情应对的研究。您有权随时退出本次调研。

如您已知晓您的全部权利，乐于自愿参与，并能和我们一起坚持每一次的答题，请点击下面的“下一页”按钮参与调研。

和您一起参与答题的，还有千万个和您一样在意疫情发展，支持疫情防控工作的中国民众。让我们万众一心，赢得这场没有硝烟的战役！

1. [填空题] 请选择省份城市与地区: \_\_\_\_\_
2. [填空题] 您的手机号后 4 位为 \_\_\_\_\_ (仅用于编号)
3. [单选题] 您的性别是  
 男  
 女
4. [填空题] 请输入您的出生年份: \_\_\_\_\_
5. [单选题] 最近三天，您的出门次数为  
 0-1 次 (请跳至第 8 题)  
 >1 次
6. [单选题] 您今天是否出门  
 是  
 否 (请跳至第 8 题)
7. [单选题] 您今天出门的原因是  
 购物  
 取东西  
 工作  
 去医院  
 其他原因，请说明 \_\_\_\_\_
8. [单选题] 您今天是否佩戴口罩  
 是  
 否
9. [单选题] 您今天是否使用消毒液或 75%酒精消毒  
 是  
 否
10. [单选题] 您今天是否自测体温  
 是  
 否

1  
2  
3  
4  
5  
6  
7  
8  
9  
10  
11  
12  
13  
14  
15  
16  
17  
18  
19  
20  
21  
22  
23  
24  
25  
26  
27  
28  
29  
30  
31  
32  
33  
34  
35  
36  
37  
38  
39  
40  
41  
42  
43  
44  
45  
46  
47  
48  
49  
50  
51  
52  
53  
54  
55  
56  
57  
58  
59  
60

For peer review only

**Survey translated to English:**

## **Investigation of individual protection behaviour of Chinese community residents during COVID-19**

Hello! This is the COVID-19 research group launched by the School of Public Health, Zhejiang University. COVID-19 poses a significant threat to people's health. However, we will come together to fight COVID-19. We sincerely invite you to participate in this survey, and your participation will help us better understand people's personal protection behaviours.

There are two surveys in this study. You will be invited to answer several questions. It will take about 1-2 minutes to complete the questionnaire. Please read the questions carefully and fill them out. After submitting the questionnaire, you will receive 3 yuan for the first survey and 5 yuan for the second survey. Thank you for your continued support and participation. Let us fight COVID-19 hand in hand.

This questionnaire is strictly private and confidential. All your answers will be kept strictly confidential and used only for research in response to the outbreak, and you have the right to withdraw from the survey at any time.

If you fully understand your rights, are willing to volunteer, and can answer every question, please click the "next page" button below to participate in the research.

There are thousands of people who care about the evolution of the epidemic and support epidemic prevention and control efforts like you who are participating in the survey. Let us unite as one to win the battle without smoke!

1. [Completion] Please state your province and city: \_\_\_\_\_
2. [Completion] Please fill in the last 4 digits of your cell phone number: \_\_\_\_\_ (Just for numbering)
3. [Multiple Choice] What is your gender?  
 Male       Female
4. [Completion] Please fill in your year of birth: \_\_\_\_\_
5. [Multiple Choice] The number of times you have gone out in the last three days is  
 0-1 time (Please skip to question 8)       >1
6. [Multiple Choice] Have you been out today?  
 YES       No
7. [Multiple Choice] The reason you went out today is  
 shopping  
 take things  
 work  
 go to the hospital  
 other reasons. Please indicate the reason in detail \_\_\_\_\_

1  
2  
3  
4 8. [Multiple Choice] Are you wearing a mask today?

5       YES       No

6  
7 9. [Multiple Choice] Have you used disinfectant or 75% alcohol today?

8       YES       No

9  
10 10. [Multiple Choice] Have you taken your temperature today?

11       YES       No  
12  
13  
14  
15  
16  
17  
18  
19  
20  
21  
22  
23  
24  
25  
26  
27  
28  
29  
30  
31  
32  
33  
34  
35  
36  
37  
38  
39  
40  
41  
42  
43  
44  
45  
46  
47  
48  
49  
50  
51  
52  
53  
54  
55  
56  
57  
58  
59  
60

For peer review only

## Supplemental Material 2

## Home Quarantine

|                                  | B      | S.E.  | Wald   | df | Sig.  | Exp(B) | 95% C.I. for EXP(B) |       |
|----------------------------------|--------|-------|--------|----|-------|--------|---------------------|-------|
|                                  |        |       |        |    |       |        | Lower               | Upper |
| Gender                           | 0.489  | 0.092 | 28.482 | 1  | 0     | 1.63   | 1.363               | 1.951 |
| Policy implementation timeliness | 0.001  | 0.008 | 0.025  | 1  | 0.875 | 1.001  | 0.985               | 1.018 |
| Risk Exposure                    | -0.019 | 0.044 | 0.193  | 1  | 0.66  | 0.981  | 0.899               | 1.07  |
| Age $\leq 20$                    |        |       | 7.138  | 4  | 0.129 |        |                     |       |
| Age 21-30                        | -0.208 | 0.127 | 2.712  | 1  | 0.1   | 0.812  | 0.633               | 1.04  |
| Age 31-40                        | -0.342 | 0.139 | 6.035  | 1  | 0.014 | 0.71   | 0.54                | 0.933 |
| Age 41-50                        | -0.382 | 0.192 | 3.955  | 1  | 0.047 | 0.683  | 0.469               | 0.995 |
| Age $> 50$                       | -0.165 | 0.28  | 0.349  | 1  | 0.555 | 0.848  | 0.49                | 1.467 |
| Constant                         | 0.723  | 0.249 | 8.407  | 1  | 0.004 | 2.061  |                     |       |

## Mask-Wearing

|                                  | B      | S.E.  | Wald   | df | Sig.  | Exp(B) | 95% C.I. for EXP(B) |       |
|----------------------------------|--------|-------|--------|----|-------|--------|---------------------|-------|
|                                  |        |       |        |    |       |        | Lower               | Upper |
| Gender                           | -0.575 | 0.095 | 36.715 | 1  | 0     | 0.563  | 0.468               | 0.678 |
| Policy implementation timeliness | -0.005 | 0.009 | 0.271  | 1  | 0.603 | 0.995  | 0.977               | 1.014 |
| Risk Exposure                    | 0.331  | 0.047 | 50.582 | 1  | 0     | 1.393  | 1.271               | 1.526 |
| Age $\leq 20$                    |        |       | 22.317 | 4  | 0     |        |                     |       |
| Age 21-30                        | 0.248  | 0.127 | 3.793  | 1  | 0.051 | 1.281  | 0.998               | 1.643 |
| Age 31-40                        | 0.646  | 0.151 | 18.394 | 1  | 0     | 1.908  | 1.42                | 2.564 |
| Age 41-50                        | 0.616  | 0.212 | 8.428  | 1  | 0.004 | 1.851  | 1.221               | 2.805 |
| Age $> 50$                       | 0.367  | 0.303 | 1.471  | 1  | 0.225 | 1.444  | 0.797               | 2.614 |
| Constant                         | 0.891  | 0.26  | 11.762 | 1  | 0.001 | 2.439  |                     |       |

## Hand-Sanitising

|                                  | B      | S.E.  | Wald   | df | Sig.  | Exp(B) | 95% C.I. for EXP(B) |       |
|----------------------------------|--------|-------|--------|----|-------|--------|---------------------|-------|
|                                  |        |       |        |    |       |        | Lower               | Upper |
| Gender                           | -0.152 | 0.091 | 2.804  | 1  | 0.094 | 0.859  | 0.719               | 1.026 |
| Policy implementation timeliness | 0.013  | 0.009 | 2.263  | 1  | 0.133 | 1.013  | 0.996               | 1.03  |
| Risk Exposure                    | 0.317  | 0.044 | 51.548 | 1  | 0     | 1.373  | 1.259               | 1.497 |
| Age $\leq 20$                    |        |       | 31.556 | 4  | 0     |        |                     |       |
| Age 21-30                        | 0.342  | 0.118 | 8.395  | 1  | 0.004 | 1.408  | 1.117               | 1.775 |
| Age 31-40                        | 0.785  | 0.142 | 30.698 | 1  | 0     | 2.193  | 1.661               | 2.895 |
| Age 41-50                        | 0.411  | 0.19  | 4.662  | 1  | 0.031 | 1.508  | 1.039               | 2.188 |
| Age $> 50$                       | 0.206  | 0.27  | 0.58   | 1  | 0.446 | 1.228  | 0.723               | 2.086 |
| Constant                         | -0.19  | 0.246 | 0.596  | 1  | 0.44  | 0.827  |                     |       |

## Temperature-Taking

|                                  | B      | S.E.  | Wald   | df | Sig.  | Exp(B) | 95% C.I. for EXP(B) |       |
|----------------------------------|--------|-------|--------|----|-------|--------|---------------------|-------|
|                                  |        |       |        |    |       |        | Lower               | Upper |
| Gender                           | -0.266 | 0.095 | 7.886  | 1  | 0.005 | 0.767  | 0.637               | 0.923 |
| Policy implementation timeliness | 0.016  | 0.009 | 3.165  | 1  | 0.075 | 1.016  | 0.998               | 1.035 |
| Risk Exposure                    | 0.328  | 0.046 | 50.121 | 1  | 0     | 1.388  | 1.267               | 1.519 |
| Age $\leq 20$                    |        |       | 15.457 | 4  | 0.004 |        |                     |       |
| Age 21-30                        | 0.241  | 0.128 | 3.578  | 1  | 0.059 | 1.273  | 0.991               | 1.634 |
| Age 31-40                        | 0.502  | 0.149 | 11.303 | 1  | 0.001 | 1.651  | 1.233               | 2.212 |

|           |        |       |       |   |       |       |       |       |
|-----------|--------|-------|-------|---|-------|-------|-------|-------|
| Age 41-50 | -0.035 | 0.191 | 0.033 | 1 | 0.856 | 0.966 | 0.664 | 1.405 |
| Age >50   | -0.006 | 0.281 | 0     | 1 | 0.984 | 0.994 | 0.573 | 1.725 |
| Constant  | 0.234  | 0.257 | 0.826 | 1 | 0.364 | 1.264 |       |       |

For peer review only

# Reporting checklist for cross sectional study.

Based on the STROBE cross sectional guidelines.

## Instructions to authors

Complete this checklist by entering the page numbers from your manuscript where readers will find each of the items listed below.

Your article may not currently address all the items on the checklist. Please modify your text to include the missing information. If you are certain that an item does not apply, please write "n/a" and provide a short explanation.

Upload your completed checklist as an extra file when you submit to a journal.

In your methods section, say that you used the STROBE cross sectional reporting guidelines, and cite them as:

von Elm E, Altman DG, Egger M, Pocock SJ, Gøtzsche PC, Vandenbroucke JP. The Strengthening the Reporting of Observational Studies in Epidemiology (STROBE) Statement: guidelines for reporting observational studies.

|                           |                                                                                                        | Page   |
|---------------------------|--------------------------------------------------------------------------------------------------------|--------|
|                           | Reporting Item                                                                                         | Number |
| <b>Title and abstract</b> |                                                                                                        |        |
| Title                     | <a href="#">#1a</a> Indicate the study's design with a commonly used term in the title or the abstract | 1      |



|    |                      |                     |                                                                 |     |
|----|----------------------|---------------------|-----------------------------------------------------------------|-----|
| 1  | Abstract             | <a href="#">#1b</a> | Provide in the abstract an informative and balanced summary     | 2   |
| 2  |                      |                     | of what was done and what was found                             |     |
| 3  |                      |                     |                                                                 |     |
| 4  |                      |                     |                                                                 |     |
| 5  |                      |                     |                                                                 |     |
| 6  | <b>Introduction</b>  |                     |                                                                 |     |
| 7  |                      |                     |                                                                 |     |
| 8  |                      |                     |                                                                 |     |
| 9  |                      |                     |                                                                 |     |
| 10 | Background /         | <a href="#">#2</a>  | Explain the scientific background and rationale for the         | 3   |
| 11 | rationale            |                     | investigation being reported                                    |     |
| 12 |                      |                     |                                                                 |     |
| 13 |                      |                     |                                                                 |     |
| 14 |                      |                     |                                                                 |     |
| 15 | Objectives           | <a href="#">#3</a>  | State specific objectives, including any prespecified           | 3   |
| 16 |                      |                     | hypotheses                                                      |     |
| 17 |                      |                     |                                                                 |     |
| 18 |                      |                     |                                                                 |     |
| 19 |                      |                     |                                                                 |     |
| 20 | <b>Methods</b>       |                     |                                                                 |     |
| 21 |                      |                     |                                                                 |     |
| 22 |                      |                     |                                                                 |     |
| 23 | Study design         | <a href="#">#4</a>  | Present key elements of study design early in the paper         | 4   |
| 24 |                      |                     |                                                                 |     |
| 25 |                      |                     |                                                                 |     |
| 26 | Setting              | <a href="#">#5</a>  | Describe the setting, locations, and relevant dates, including  | 4   |
| 27 |                      |                     | periods of recruitment, exposure, follow-up, and data           |     |
| 28 |                      |                     | collection                                                      |     |
| 29 |                      |                     |                                                                 |     |
| 30 |                      |                     |                                                                 |     |
| 31 |                      |                     |                                                                 |     |
| 32 |                      |                     |                                                                 |     |
| 33 |                      |                     |                                                                 |     |
| 34 | Eligibility criteria | <a href="#">#6a</a> | Give the eligibility criteria, and the sources and methods of   | 4   |
| 35 |                      |                     | selection of participants.                                      |     |
| 36 |                      |                     |                                                                 |     |
| 37 |                      |                     |                                                                 |     |
| 38 |                      |                     |                                                                 |     |
| 39 |                      |                     |                                                                 |     |
| 40 |                      | <a href="#">#7</a>  | Clearly define all outcomes, exposures, predictors, potential   | n/a |
| 41 |                      |                     | confounders, and effect modifiers. Give diagnostic criteria, if |     |
| 42 |                      |                     | applicable                                                      |     |
| 43 |                      |                     |                                                                 |     |
| 44 |                      |                     |                                                                 |     |
| 45 |                      |                     |                                                                 |     |
| 46 |                      |                     |                                                                 |     |
| 47 | Data sources /       | <a href="#">#8</a>  | For each variable of interest give sources of data and details  | 4   |
| 48 | measurement          |                     | of methods of assessment (measurement). Describe                |     |
| 49 |                      |                     | comparability of assessment methods if there is more than       |     |
| 50 |                      |                     | one group. Give information separately for for exposed and      |     |
| 51 |                      |                     | unexposed groups if applicable.                                 |     |
| 52 |                      |                     |                                                                 |     |
| 53 |                      |                     |                                                                 |     |
| 54 |                      |                     |                                                                 |     |
| 55 |                      |                     |                                                                 |     |
| 56 |                      |                     |                                                                 |     |
| 57 |                      |                     |                                                                 |     |
| 58 |                      |                     |                                                                 |     |
| 59 |                      |                     |                                                                 |     |
| 60 |                      |                     |                                                                 |     |

|    |                |                      |                                                               |     |
|----|----------------|----------------------|---------------------------------------------------------------|-----|
| 1  | Bias           | <a href="#">#9</a>   | Describe any efforts to address potential sources of bias     | 4   |
| 2  |                |                      |                                                               |     |
| 3  |                |                      |                                                               |     |
| 4  | Study size     | <a href="#">#10</a>  | Explain how the study size was arrived at                     | 5   |
| 5  |                |                      |                                                               |     |
| 6  |                |                      |                                                               |     |
| 7  | Quantitative   | <a href="#">#11</a>  | Explain how quantitative variables were handled in the        | 5   |
| 8  | variables      |                      | analyses. If applicable, describe which groupings were        |     |
| 9  |                |                      | chosen, and why                                               |     |
| 10 |                |                      |                                                               |     |
| 11 |                |                      |                                                               |     |
| 12 |                |                      |                                                               |     |
| 13 |                |                      |                                                               |     |
| 14 |                |                      |                                                               |     |
| 15 | Statistical    | <a href="#">#12a</a> | Describe all statistical methods, including those used to     | 4   |
| 16 | methods        |                      | control for confounding                                       |     |
| 17 |                |                      |                                                               |     |
| 18 |                |                      |                                                               |     |
| 19 |                |                      |                                                               |     |
| 20 | Statistical    | <a href="#">#12b</a> | Describe any methods used to examine subgroups and            | 5   |
| 21 | methods        |                      | interactions                                                  |     |
| 22 |                |                      |                                                               |     |
| 23 |                |                      |                                                               |     |
| 24 |                |                      |                                                               |     |
| 25 |                |                      |                                                               |     |
| 26 | Statistical    | <a href="#">#12c</a> | Explain how missing data were addressed                       | 5   |
| 27 | methods        |                      |                                                               |     |
| 28 |                |                      |                                                               |     |
| 29 |                |                      |                                                               |     |
| 30 |                |                      |                                                               |     |
| 31 | Statistical    | <a href="#">#12d</a> | If applicable, describe analytical methods taking account of  | n/a |
| 32 | methods        |                      | sampling strategy                                             |     |
| 33 |                |                      |                                                               |     |
| 34 |                |                      |                                                               |     |
| 35 |                |                      |                                                               |     |
| 36 | Statistical    | <a href="#">#12e</a> | Describe any sensitivity analyses                             | n/a |
| 37 | methods        |                      |                                                               |     |
| 38 |                |                      |                                                               |     |
| 39 |                |                      |                                                               |     |
| 40 |                |                      |                                                               |     |
| 41 |                |                      |                                                               |     |
| 42 | <b>Results</b> |                      |                                                               |     |
| 43 |                |                      |                                                               |     |
| 44 |                |                      |                                                               |     |
| 45 | Participants   | <a href="#">#13a</a> | Report numbers of individuals at each stage of study—eg       | 5   |
| 46 |                |                      | numbers potentially eligible, examined for eligibility,       |     |
| 47 |                |                      | confirmed eligible, included in the study, completing follow- |     |
| 48 |                |                      | up, and analysed. Give information separately for for         |     |
| 49 |                |                      | exposed and unexposed groups if applicable.                   |     |
| 50 |                |                      |                                                               |     |
| 51 |                |                      |                                                               |     |
| 52 |                |                      |                                                               |     |
| 53 |                |                      |                                                               |     |
| 54 |                |                      |                                                               |     |
| 55 |                |                      |                                                               |     |
| 56 |                |                      |                                                               |     |
| 57 | Participants   | <a href="#">#13b</a> | Give reasons for non-participation at each stage              | 5   |
| 58 |                |                      |                                                               |     |
| 59 |                |                      |                                                               |     |
| 60 |                |                      |                                                               |     |

|    |                   |                      |                                                                   |     |
|----|-------------------|----------------------|-------------------------------------------------------------------|-----|
| 1  | Participants      | <a href="#">#13c</a> | Consider use of a flow diagram                                    | n/a |
| 2  |                   |                      |                                                                   |     |
| 3  |                   |                      |                                                                   |     |
| 4  | Descriptive data  | <a href="#">#14a</a> | Give characteristics of study participants (eg demographic,       | 5   |
| 5  |                   |                      | clinical, social) and information on exposures and potential      |     |
| 6  |                   |                      | confounders. Give information separately for exposed and          |     |
| 7  |                   |                      | unexposed groups if applicable.                                   |     |
| 8  |                   |                      |                                                                   |     |
| 9  |                   |                      |                                                                   |     |
| 10 |                   |                      |                                                                   |     |
| 11 |                   |                      |                                                                   |     |
| 12 |                   |                      |                                                                   |     |
| 13 |                   |                      |                                                                   |     |
| 14 | Descriptive data  | <a href="#">#14b</a> | Indicate number of participants with missing data for each        | 5   |
| 15 |                   |                      | variable of interest                                              |     |
| 16 |                   |                      |                                                                   |     |
| 17 |                   |                      |                                                                   |     |
| 18 |                   |                      |                                                                   |     |
| 19 | Outcome data      | <a href="#">#15</a>  | Report numbers of outcome events or summary measures.             | 4   |
| 20 |                   |                      | Give information separately for exposed and unexposed             |     |
| 21 |                   |                      | groups if applicable.                                             |     |
| 22 |                   |                      |                                                                   |     |
| 23 |                   |                      |                                                                   |     |
| 24 |                   |                      |                                                                   |     |
| 25 |                   |                      |                                                                   |     |
| 26 |                   |                      |                                                                   |     |
| 27 | Main results      | <a href="#">#16a</a> | Give unadjusted estimates and, if applicable, confounder-         | 6   |
| 28 |                   |                      | adjusted estimates and their precision (eg, 95% confidence        |     |
| 29 |                   |                      | interval). Make clear which confounders were adjusted for         |     |
| 30 |                   |                      | and why they were included                                        |     |
| 31 |                   |                      |                                                                   |     |
| 32 |                   |                      |                                                                   |     |
| 33 |                   |                      |                                                                   |     |
| 34 |                   |                      |                                                                   |     |
| 35 |                   |                      |                                                                   |     |
| 36 |                   |                      |                                                                   |     |
| 37 | Main results      | <a href="#">#16b</a> | Report category boundaries when continuous variables were         | 6   |
| 38 |                   |                      | categorized                                                       |     |
| 39 |                   |                      |                                                                   |     |
| 40 |                   |                      |                                                                   |     |
| 41 |                   |                      |                                                                   |     |
| 42 | Main results      | <a href="#">#16c</a> | If relevant, consider translating estimates of relative risk into | n/a |
| 43 |                   |                      | absolute risk for a meaningful time period                        |     |
| 44 |                   |                      |                                                                   |     |
| 45 |                   |                      |                                                                   |     |
| 46 |                   |                      |                                                                   |     |
| 47 |                   |                      |                                                                   |     |
| 48 | Other analyses    | <a href="#">#17</a>  | Report other analyses done—e.g., analyses of subgroups            | 6   |
| 49 |                   |                      | and interactions, and sensitivity analyses                        |     |
| 50 |                   |                      |                                                                   |     |
| 51 |                   |                      |                                                                   |     |
| 52 |                   |                      |                                                                   |     |
| 53 | <b>Discussion</b> |                      |                                                                   |     |
| 54 |                   |                      |                                                                   |     |
| 55 |                   |                      |                                                                   |     |
| 56 | Key results       | <a href="#">#18</a>  | Summarise key results with reference to study objectives          | 7   |
| 57 |                   |                      |                                                                   |     |
| 58 |                   |                      |                                                                   |     |
| 59 |                   |                      |                                                                   |     |
| 60 |                   |                      |                                                                   |     |

|    |                          |                     |                                                                |     |
|----|--------------------------|---------------------|----------------------------------------------------------------|-----|
| 1  | Limitations              | <a href="#">#19</a> | Discuss limitations of the study, taking into account sources  | 9   |
| 2  |                          |                     | of potential bias or imprecision. Discuss both direction and   |     |
| 3  |                          |                     | magnitude of any potential bias.                               |     |
| 4  |                          |                     |                                                                |     |
| 5  |                          |                     |                                                                |     |
| 6  |                          |                     |                                                                |     |
| 7  |                          |                     |                                                                |     |
| 8  |                          |                     |                                                                |     |
| 9  | Interpretation           | <a href="#">#20</a> | Give a cautious overall interpretation considering objectives, | 7-9 |
| 10 |                          |                     | limitations, multiplicity of analyses, results from similar    |     |
| 11 |                          |                     | studies, and other relevant evidence.                          |     |
| 12 |                          |                     |                                                                |     |
| 13 |                          |                     |                                                                |     |
| 14 |                          |                     |                                                                |     |
| 15 |                          |                     |                                                                |     |
| 16 | Generalisability         | <a href="#">#21</a> | Discuss the generalisability (external validity) of the study  | 9   |
| 17 |                          |                     | results.                                                       |     |
| 18 |                          |                     |                                                                |     |
| 19 |                          |                     |                                                                |     |
| 20 |                          |                     |                                                                |     |
| 21 |                          |                     |                                                                |     |
| 22 | <b>Other Information</b> |                     |                                                                |     |
| 23 |                          |                     |                                                                |     |
| 24 |                          |                     |                                                                |     |
| 25 | Funding                  | <a href="#">#22</a> | Give the source of funding and the role of the funders for the | 10  |
| 26 |                          |                     | present study and, if applicable, for the original study on    |     |
| 27 |                          |                     | which the present article is based                             |     |
| 28 |                          |                     |                                                                |     |
| 29 |                          |                     |                                                                |     |
| 30 |                          |                     |                                                                |     |
| 31 |                          |                     |                                                                |     |
| 32 |                          |                     |                                                                |     |

33 None The STROBE checklist is distributed under the terms of the Creative Commons Attribution  
34 License CC-BY. This checklist can be completed online using <https://www.goodreports.org/>, a tool  
35 made by the [EQUATOR Network](#) in collaboration with [Penelope.ai](#)  
36  
37  
38  
39  
40  
41  
42  
43  
44  
45  
46  
47  
48  
49  
50  
51  
52  
53  
54  
55  
56  
57  
58  
59  
60
