# Supplementary material for: Demographic and social correlates and indicators for behavioural compliance with personal protection among Chinese community-dwellers during COVID-19: a cross-sectional study
Source: PubMed Central journal article supplement — BMJ Open. 2021 Jan 6;11(1):e041453. doi: 10.1136/bmjopen-2020-041453 (PMC7789200; doi:10.1136/bmjopen-2020-041453), 2021-01-06
Supplement: bmjopen-2020-041453supp001.pdf [file bmjopen-2020-041453supp001.pdf]

## Supplemental Material 1

### 中国社区居民在 COVID-19 期间个人保护行为的调查

你好！这里是浙江大学公共卫生学院发起的新冠疫情调研组。新冠肺炎的肆虐给人民健康带来了极大的威胁。但是我们定会众志成城，共同战“疫”！我们在此诚挚邀请您参加本次调研，您的参与将会帮助我们更好地了解民众个人保护行为。

本次调研将会分两次进行。我们会邀请您参与多次答题。本次问卷大约需要 1-2 分钟完成。请仔细阅读清楚问题之后填写。每次提交问卷后，经过系统核查，第一次问卷您将得到 3 元红包，第二次问卷您将得到 5 元红包。感谢您一如既往的支持和参与，让我们上下一心，携手并进，共同抗击新冠病毒！

本问卷不涉及您的任何隐私。您的所有答案将严格保密，仅用于疫情应对的研究。您有权随时退出本次调研。

如您已知晓您的全部权利，乐于自愿参与，并能和我们一起坚持每一次的答题，请点击下面的“下一页”按钮参与调研。

和您一起参与答题的，还有千万个和您一样在意疫情发展，支持疫情防控工作的中国民众。让我们万众一心，赢得这场没有硝烟的战役！

1. [填空题] 请选择省份城市与地区: \_\_\_\_\_
2. [填空题] 您的手机号后 4 位为 \_\_\_\_\_ (仅用于编号)
3. [单选题] 您的性别是  
男  
女
4. [填空题] 请输入您的出生年份: \_\_\_\_\_
5. [单选题] 最近三天，您的出门次数为  
0-1 次 (请跳至第 8 题)  
>1 次
6. [单选题] 您今天是否出门  
是  
否 (请跳至第 8 题)
7. [单选题] 您今天出门的原因是  
购物  
取东西  
工作  
去医院  
其他原因，请说明\_\_\_\_\_
8. [单选题] 您今天是否佩戴口罩  
是  
否
9. [单选题] 您今天是否使用消毒液或 75%酒精消毒  
是  
否
10. [单选题] 您今天是否自测体温  
是  
否



**Survey translated to English:****Investigation of individual protection behaviour of Chinese community residents during COVID-19**

Hello! This is the COVID-19 research group launched by the School of Public Health, Zhejiang University. COVID-19 poses a significant threat to people's health. However, we will come together to fight COVID-19. We sincerely invite you to participate in this survey, and your participation will help us better understand people's personal protection behaviours.

There are two surveys in this study. You will be invited to answer several questions. It will take about 1-2 minutes to complete the questionnaire. Please read the questions carefully and fill them out. After submitting the questionnaire, you will receive 3 yuan for the first survey and 5 yuan for the second survey. Thank you for your continued support and participation. Let us fight COVID-19 hand in hand.

This questionnaire is strictly private and confidential. All your answers will be kept strictly confidential and used only for research in response to the outbreak, and you have the right to withdraw from the survey at any time.

If you fully understand your rights, are willing to volunteer, and can answer every question, please click the "next page" button below to participate in the research.

There are thousands of people who care about the evolution of the epidemic and support epidemic prevention and control efforts like you who are participating in the survey. Let us unite as one to win the battle without smoke!

1. [Completion] Please state your province and city: \_\_\_\_\_
2. [Completion] Please fill in the last 4 digits of your cell phone number: \_\_\_\_\_ (Just for numbering)
3. [Multiple Choice] What is your gender?  
 Male     Female
4. [Completion] Please fill in your year of birth: \_\_\_\_\_
5. [Multiple Choice] The number of times you have gone out in the last three days is  
 0-1 time (Please skip to question 8)     >1
6. [Multiple Choice] Have you been out today?  
 YES     No
7. [Multiple Choice] The reason you went out today is  
 shopping  
 take things  
 work  
 go to the hospital  
 other reasons. Please indicate the reason in detail \_\_\_\_\_

8. [Multiple Choice] Are you wearing a mask today?  
 YES       No
9. [Multiple Choice] Have you used disinfectant or 75% alcohol today?  
 YES       No
10. [Multiple Choice] Have you taken your temperature today?  
 YES       No
