# Supplementary material for: Demographic and social correlates and indicators for behavioural compliance with personal protection among Chinese community-dwellers during COVID-19: a cross-sectional study
Source: PubMed Central journal article supplement — BMJ Open. 2021 Jan 6;11(1):e041453. doi: 10.1136/bmjopen-2020-041453 (PMC7789200; doi:10.1136/bmjopen-2020-041453), 2021-01-06
Supplement: bmjopen-2020-041453supp002.pdf [file bmjopen-2020-041453supp002.pdf]

**Supplemental Material 2**

**Home Quarantine**

|                                  | B      | S.E.  | Wald   | df | Sig.  | Exp(B) | 95% C.I. for EXP(B) |       |
|----------------------------------|--------|-------|--------|----|-------|--------|---------------------|-------|
|                                  |        |       |        |    |       |        | Lower               | Upper |
| Gender                           | 0.489  | 0.092 | 28.482 | 1  | 0     | 1.63   | 1.363               | 1.951 |
| Policy implementation timeliness | 0.001  | 0.008 | 0.025  | 1  | 0.875 | 1.001  | 0.985               | 1.018 |
| Risk Exposure                    | -0.019 | 0.044 | 0.193  | 1  | 0.66  | 0.981  | 0.899               | 1.07  |
| Age ≤20                          |        |       | 7.138  | 4  | 0.129 |        |                     |       |
| Age 21-30                        | -0.208 | 0.127 | 2.712  | 1  | 0.1   | 0.812  | 0.633               | 1.04  |
| Age 31-40                        | -0.342 | 0.139 | 6.035  | 1  | 0.014 | 0.71   | 0.54                | 0.933 |
| Age 41-50                        | -0.382 | 0.192 | 3.955  | 1  | 0.047 | 0.683  | 0.469               | 0.995 |
| Age >50                          | -0.165 | 0.28  | 0.349  | 1  | 0.555 | 0.848  | 0.49                | 1.467 |
| Constant                         | 0.723  | 0.249 | 8.407  | 1  | 0.004 | 2.061  |                     |       |

**Mask-Wearing**

|                                  | B      | S.E.  | Wald   | df | Sig.  | Exp(B) | 95% C.I. for EXP(B) |       |
|----------------------------------|--------|-------|--------|----|-------|--------|---------------------|-------|
|                                  |        |       |        |    |       |        | Lower               | Upper |
| Gender                           | -0.575 | 0.095 | 36.715 | 1  | 0     | 0.563  | 0.468               | 0.678 |
| Policy implementation timeliness | -0.005 | 0.009 | 0.271  | 1  | 0.603 | 0.995  | 0.977               | 1.014 |
| Risk Exposure                    | 0.331  | 0.047 | 50.582 | 1  | 0     | 1.393  | 1.271               | 1.526 |
| Age ≤20                          |        |       | 22.317 | 4  | 0     |        |                     |       |
| Age 21-30                        | 0.248  | 0.127 | 3.793  | 1  | 0.051 | 1.281  | 0.998               | 1.643 |
| Age 31-40                        | 0.646  | 0.151 | 18.394 | 1  | 0     | 1.908  | 1.42                | 2.564 |
| Age 41-50                        | 0.616  | 0.212 | 8.428  | 1  | 0.004 | 1.851  | 1.221               | 2.805 |
| Age >50                          | 0.367  | 0.303 | 1.471  | 1  | 0.225 | 1.444  | 0.797               | 2.614 |
| Constant                         | 0.891  | 0.26  | 11.762 | 1  | 0.001 | 2.439  |                     |       |

**Hand-Sanitising**

|                                  | B      | S.E.  | Wald   | df | Sig.  | Exp(B) | 95% C.I. for EXP(B) |       |
|----------------------------------|--------|-------|--------|----|-------|--------|---------------------|-------|
|                                  |        |       |        |    |       |        | Lower               | Upper |
| Gender                           | -0.152 | 0.091 | 2.804  | 1  | 0.094 | 0.859  | 0.719               | 1.026 |
| Policy implementation timeliness | 0.013  | 0.009 | 2.263  | 1  | 0.133 | 1.013  | 0.996               | 1.03  |
| Risk Exposure                    | 0.317  | 0.044 | 51.548 | 1  | 0     | 1.373  | 1.259               | 1.497 |
| Age ≤20                          |        |       | 31.556 | 4  | 0     |        |                     |       |
| Age 21-30                        | 0.342  | 0.118 | 8.395  | 1  | 0.004 | 1.408  | 1.117               | 1.775 |
| Age 31-40                        | 0.785  | 0.142 | 30.698 | 1  | 0     | 2.193  | 1.661               | 2.895 |
| Age 41-50                        | 0.411  | 0.19  | 4.662  | 1  | 0.031 | 1.508  | 1.039               | 2.188 |
| Age >50                          | 0.206  | 0.27  | 0.58   | 1  | 0.446 | 1.228  | 0.723               | 2.086 |
| Constant                         | -0.19  | 0.246 | 0.596  | 1  | 0.44  | 0.827  |                     |       |

**Temperature-Taking**

|                                  | B      | S.E.  | Wald   | df | Sig.  | Exp(B) | 95% C.I. for EXP(B) |       |
|----------------------------------|--------|-------|--------|----|-------|--------|---------------------|-------|
|                                  |        |       |        |    |       |        | Lower               | Upper |
| Gender                           | -0.266 | 0.095 | 7.886  | 1  | 0.005 | 0.767  | 0.637               | 0.923 |
| Policy implementation timeliness | 0.016  | 0.009 | 3.165  | 1  | 0.075 | 1.016  | 0.998               | 1.035 |
| Risk Exposure                    | 0.328  | 0.046 | 50.121 | 1  | 0     | 1.388  | 1.267               | 1.519 |
| Age ≤20                          |        |       | 15.457 | 4  | 0.004 |        |                     |       |
| Age 21-30                        | 0.241  | 0.128 | 3.578  | 1  | 0.059 | 1.273  | 0.991               | 1.634 |
| Age 31-40                        | 0.502  | 0.149 | 11.303 | 1  | 0.001 | 1.651  | 1.233               | 2.212 |

|           |        |       |       |   |       |       |       |       |
|-----------|--------|-------|-------|---|-------|-------|-------|-------|
| Age 41-50 | -0.035 | 0.191 | 0.033 | 1 | 0.856 | 0.966 | 0.664 | 1.405 |
| Age >50   | -0.006 | 0.281 | 0     | 1 | 0.984 | 0.994 | 0.573 | 1.725 |
| Constant  | 0.234  | 0.257 | 0.826 | 1 | 0.364 | 1.264 |       |       |
